# Supplementary material for: Microwave spectra of dinitrotoluene isomers: a new step towards the detection of explosive vapors
Source: Royal Society of Chemistry journal article supplement (doi:10.1039/d3cp01577g), 2023-01-01
Supplement: d3cp01577g1.pdf [file d3cp01577g1.pdf]

Supporting Information for

# Microwave spectra of dinitrotoluene isomers: a new step towards the detection of explosive vapors

Mhamad Chrayteh,<sup>\*a</sup> Pascal Dréan,<sup>b</sup> Manuel Goubet,<sup>b</sup> Laurent H. Coudert,<sup>c</sup> Anthony Roucou,<sup>a</sup> and Arnaud Cuisset<sup>\*a</sup>

<sup>a</sup> Université du Littoral Cote d'Opale, UR 4493, LPCA, Laboratoire de Physico-Chimie de l'Atmosphère, F-59140 Dunkerque, France

<sup>b</sup> Université de Lille, CNRS, UMR8523 - PhLAM - Physique des Lasers Atomes et Molécules, F-59000 Lille, France

<sup>c</sup> Université Paris-Saclay, CNRS, Institut des Sciences Moléculaires d'Orsay, 91405 Orsay, France

# Contents

|    |                                                                               |    |
|----|-------------------------------------------------------------------------------|----|
| S1 | Theoretical determination of $\chi_2, \theta_2, \phi_2$ for 2,4-DNT . . . . . | S4 |
|----|-------------------------------------------------------------------------------|----|

## List of Figures

|    |                                                                                                                                                                                                                                                                                                                                                                                                                                                                                                                                                                                                                                                                                                                                                                                                          |    |
|----|----------------------------------------------------------------------------------------------------------------------------------------------------------------------------------------------------------------------------------------------------------------------------------------------------------------------------------------------------------------------------------------------------------------------------------------------------------------------------------------------------------------------------------------------------------------------------------------------------------------------------------------------------------------------------------------------------------------------------------------------------------------------------------------------------------|----|
| S1 | The molecular model used for 2,4-DNT is illustrated. It consists of a rigid planar $C_6H_3N_2O_4$ frame and a $C_{3v}$ methyl group. Numbers 1, 2, and 3 identify the three hydrogen atoms of this group, the letter $a$ its carbon atom, the letters $b$ and $c$ two carbon atoms of the phenyl ring, $N_1$ and $N_2$ the two nitrogen atoms, and the letter $C$ the molecular center of mass. The methyl group rotates about an axis parallel to the $C_aC_b$ bond. In agreement with the paper, the torsional angle $\alpha$ is the dihedral angle $\angle H_1C_aC_bC_c$ . The molecular fixed $xyz$ axis system coincides with the principal axis system and the $I'$ representation is used. The molecule fixed $xyz$ axis system is not drawn at the molecular center of mass for clarity. . . . . | S5 |
| S2 | The geometry of the 6 minima of the 2,6-DNT isomer 2-dimensional potential energy surface drawn in the upper panel of Fig. 3 and corresponding to methyl group torsion in the weak steric hindrance limit. The numbering of the 6 minima is the same as in this figure. The hydrogen atoms of the methyl group are numbered 1 through 3 and drawn respectively in red, blue, and green. . . . .                                                                                                                                                                                                                                                                                                                                                                                                          | S6 |
| S3 | The geometry of the 6 stationary points of the 2,6-DNT isomer 2-dimensional potential energy surface drawn in the upper panel of Fig. 3 and corresponding to methyl group torsion in the weak steric hindrance limit. The labeling of the 6 stationary points is the same as in this figure. The hydrogen atoms of the methyl group are numbered 1 through 3 and drawn respectively in red, blue, and green. . . . .                                                                                                                                                                                                                                                                                                                                                                                     | S6 |
| S4 | The geometry of the 6 minima of the 2,6-DNT isomer 2-dimensional potential energy surface drawn in the lower panel of Fig. 3 and corresponding to methyl group torsion in the strong steric hindrance limit. The numbering of the 6 minima is the same as in this figure. The hydrogen atoms of the methyl group are numbered 1 through 3 and drawn respectively in red, blue, and green. . . . .                                                                                                                                                                                                                                                                                                                                                                                                        | S6 |
| S5 | The geometry of the 6 maxima of the 2,6-DNT isomer 2-dimensional potential energy surface drawn in the lower panel of Fig. 3 and corresponding to methyl group torsion in the strong steric hindrance limit. The numbering of the 6 maxima is the same as in this figure. The hydrogen atoms of the methyl group are numbered 1 through 3 and are drawn respectively in red, blue, and green. . . . .                                                                                                                                                                                                                                                                                                                                                                                                    | S7 |
| S6 | The geometry of the 6 stationary points of the 2,6-DNT isomer 2-dimensional potential energy surface drawn in the lower panel of Fig. 3 and corresponding to methyl group torsion in the strong steric hindrance limit. The numbering of the 6 stationary points is the same as in this figure. The hydrogen atoms of the methyl group are numbered 1 through 3 and are drawn respectively in red, blue, and green. . . . .                                                                                                                                                                                                                                                                                                                                                                              | S7 |
| S7 | The geometry of the 6 minima of the 2,4-DNT isomer 2-dimensional potential energy surface drawn in Fig. 6. The minima are labeled using the pair identifier with a prime sign (') or double prime sign (''). The hydrogen atoms of the methyl group are numbered 1 through 3 and drawn respectively in red, blue, and green. . . . .                                                                                                                                                                                                                                                                                                                                                                                                                                                                     | S8 |
| S8 | The geometry of the 6 stationary points of the 2,4-DNT isomer 2-dimensional potential energy surface drawn in Fig. 6. The labeling of the stationary points is the same as in this figure. The hydrogen atoms of the methyl group are numbered 1 through 3 and are drawn respectively in red, blue, and green. . . . .                                                                                                                                                                                                                                                                                                                                                                                                                                                                                   | S9 |

|     |                                                                                                                                                                                                                                                                                                                                                                                                                                                                                                                                                                                   |     |
|-----|-----------------------------------------------------------------------------------------------------------------------------------------------------------------------------------------------------------------------------------------------------------------------------------------------------------------------------------------------------------------------------------------------------------------------------------------------------------------------------------------------------------------------------------------------------------------------------------|-----|
| S9  | The geometry of the 3 local minima of the 2,4-DNT isomer 2-dimensional potential energy surface drawn in Fig. 6. The labeling of the local minima is the same as in this figure. The hydrogen atoms of the methyl group are numbered 1 through 3 and are drawn respectively in red, blue, and green. . . . .                                                                                                                                                                                                                                                                      | S9  |
| S10 | The geometry of the 6 minima of the 2,6-DNT isomer 2-dimensional potential energy surface drawn in Fig. 8. The numbering of the 6 minima is the same as in this figure. The hydrogen atoms of the methyl group are numbered 1 through 3 and drawn respectively in red, blue, and green. . . . .                                                                                                                                                                                                                                                                                   | S10 |
| S11 | The geometry of the 6 maxima of the 2,6-DNT isomer 2-dimensional potential energy surface drawn in Fig. 8. The numbering of the 6 maxima is the same as in this figure. The hydrogen atoms of the methyl group are numbered 1 through 3 and drawn respectively in red, blue, and green. . . . .                                                                                                                                                                                                                                                                                   | S10 |
| S12 | The geometry of the 6 stationary points of the 2,6-DNT isomer 2-dimensional potential energy surface drawn in Fig. 8. The numbering of the 6 stationary points is the same as in this figure. The hydrogen atoms of the methyl group are numbered 1 through 3 and drawn respectively in red, blue, and green. . . . .                                                                                                                                                                                                                                                             | S10 |
| S13 | The geometry of the 3 maxima of the 2,6-DNT isomer 2-dimensional potential energy surface drawn in Fig. 10. The numbering of the 3 maxima is the same as in this figure. The hydrogen atoms of the methyl group are numbered 1 through 3 and drawn respectively in red, blue, and green. . . . .                                                                                                                                                                                                                                                                                  | S11 |
| S14 | A cut of the 2-D potential energy surface of 2,4-DNT, as calculated at the B98/cc-pVTZ level of theory in the paper and shown in Fig. 6. The cut corresponds to a tunneling path allowing us to connect the two minima belonging to Pair 1. The potential energy, in $\text{cm}^{-1}$ , blue curve, and the angle $\alpha$ , in degrees, red curve, are plotted as a function of the angle $\tau$ . The $y$ -axes on the left and on the right should be used for the potential energy and the angle $\alpha$ , respectively. . . . .                                             | S11 |
| S15 | A cut of the 2-D potential energy surface of 2,6-DNT, as calculated at the B98/cc-pVTZ level of theory in the paper and shown in Fig. 8. The cut corresponds to the 1 $\rightarrow$ 4 tunneling path allowing us to go from equilibrium configuration 1 to equilibrium configuration 4. The potential energy, in $\text{cm}^{-1}$ , blue curve, and the angle $\alpha$ , in degrees, red curve, are plotted as a function of the angle $\tau$ . The $y$ -axes on the left and on the right should be used for the potential energy and the angle $\alpha$ , respectively. . . . . | S11 |

## List of Tables

|    |                                                                                                                                                                                                                                                                                                                                                                                                                                                                                                                                                                                    |     |
|----|------------------------------------------------------------------------------------------------------------------------------------------------------------------------------------------------------------------------------------------------------------------------------------------------------------------------------------------------------------------------------------------------------------------------------------------------------------------------------------------------------------------------------------------------------------------------------------|-----|
| S1 | Measured frequencies ( $\nu_{\text{obs.}}$ ) and residuals ( $\nu_{\text{obs.}} - \nu_{\text{calc.}}$ ) in MHz of the 2,4 dinitrotoluene isomer . . . . .                                                                                                                                                                                                                                                                                                                                                                                                                          | S13 |
| S2 | Measured frequencies ( $\nu_{\text{obs.}}$ ) and residuals ( $\nu_{\text{obs.}} - \nu_{\text{calc.}}$ ) in MHz of the 2,6 dinitrotoluene isomer . . . . .                                                                                                                                                                                                                                                                                                                                                                                                                          | S18 |
| S3 | Observed minus calculated table for the analysis reported in Section 4.1 for 2,4-DNT. Transitions are assigned with the rotational quantum numbers $J_{K_a K_c}$ and the torsional symmetry species $S$ of the upper and lower levels. For transitions with resolved hyperfine splittings, the total angular momentum $F$ and the total nuclear spin angular momentum $I$ are given. Columns headed obs, $\nu_{\text{obs.}} - \nu_{\text{calc.}}$ , and exp. error list observed frequencies, observed minus calculated residuals, and uncertainties in MHz, respectively. . . . . | S24 |

## S1 Theoretical determination of $\chi_2, \theta_2, \phi_2$ for 2,4-DNT

These three Eulerian-type angles are involved in the rotational dependence of the tunneling splitting. They should be determined using the procedure outlined in Section 5 of Hougen.<sup>1</sup> Atom positions in the  $xyz$  molecule fixed axis system,  $\mathbf{a}_i(\eta)$ , with  $1 \leq i \leq 19$ , are parameterized in terms of a path coordinate  $\eta$ , with  $-1 \leq \eta \leq +1$ , such that  $\eta = -1$  at the beginning of the tunneling path, at Configuration 1, and  $\eta = +1$  at the end of the tunneling path, at Configuration 2. Atom positions can be obtained with the help of Fig. S1. As emphasized by this figure, positions of all atoms, except the three methyl group hydrogen atoms, do not depend on  $\eta$  and satisfy  $a(\eta)_{iy} = 0$ . The methyl group hydrogen atoms position are parameterized by the torsional angle  $\alpha$  introduced in the paper. Taking  $\alpha(\eta) = (1 + \eta)\pi/3$ , ensures that the methyl group is rotated through  $2\pi/3$  when  $\eta$  goes from  $-1$  to  $+1$ .

In agreement with Hougen,<sup>1</sup> the rotational angular momentum  $\mathbf{L}(\eta)$  generated by the large amplitude motion along the tunneling path and the molecule inertia tensor  $\mathbf{I}(\eta)$  need to be evaluated. The former is given by:

$$\mathbf{L}(\eta) = \sum_{i=1}^{19} m_i \mathbf{a}_i(\eta) \times \frac{d\mathbf{a}_i(\eta)}{d\eta} \quad (1)$$

where  $m_i$  is the mass of atom  $i$ . It is found in the case of 2,4-DNT that  $\mathbf{L}(\eta)$  does not depend on  $\eta$  and reduces to:

$$\mathbf{L} = \frac{I\pi}{3} \begin{pmatrix} \sin \delta \\ 0 \\ \cos \delta \end{pmatrix} \quad (2)$$

where  $I$  is the diagonal component of the methyl group inertia tensor along its three fold axis of symmetry and  $\delta$  is the angle between the axis of internal rotation and the molecule fixed  $z$  axis. This equation shows that the tunneling angular momentum is  $\eta$ -independent and lies in the  $xz$  plane. Similarly, it is found that the inertia tensor does not depend on  $\eta$  and that the  $y$  axis is the  $c$  principal axis of inertia.

The next step is solving the three coupled ordinary, nonlinear, differential equations in Eqs. (49) of Hougen.<sup>1</sup> In the present case, In the present case, these equations reduces to:

$$\begin{pmatrix} d\gamma \\ d\beta \\ d\alpha \end{pmatrix} = \begin{pmatrix} +\cos \alpha / \cos \beta & -\sin \alpha / \cos \beta & 0 \\ +\sin \alpha & +\cos \alpha & 0 \\ -\cos \alpha \sin \beta / \cos \beta & +\sin \alpha \sin \beta / \cos \beta & 1 \end{pmatrix} \boldsymbol{\mu} \cdot \mathbf{L} \quad (3)$$

where  $\boldsymbol{\mu}$  is the inverse inertia tensor and  $\alpha, \beta, \gamma$  are shorthand notations for  $\alpha_{Pp}, \beta_{Pp}, \gamma_{Pp}$ . The latter parameterize the  $3 \times 3$  rotation matrix  $T^{-1}(\alpha, \beta, \gamma)$  introduced in Eq. (30) of Hougen.<sup>1</sup> Equation (3) is solved numerically using the DERKF subroutine from the SLATEC library.<sup>2</sup> This yields values for  $\alpha_{Pp}, \beta_{Pp}, \gamma_{Pp}$  at Configuration 2 which are denoted  $\alpha_{P2}, \beta_{P2}, \gamma_{P2}$ . The angles  $\chi_2, \theta_2, \phi_2$  are then obtained solving Eq. (4) of Coudert and Hougen<sup>3</sup> rewritten below:

$$T^{-1}(\alpha_{P2}, \beta_{P2}, \gamma_{P2}) = S^{-1}(\chi_2, \theta_2, \phi_2) \quad (4)$$

where  $S^{-1}$  is the usual  $3 \times 3$  rotation matrix depending on the Eulerian angles. It can be found in many textbooks and in Eq. (18) of Hougen.<sup>1</sup>

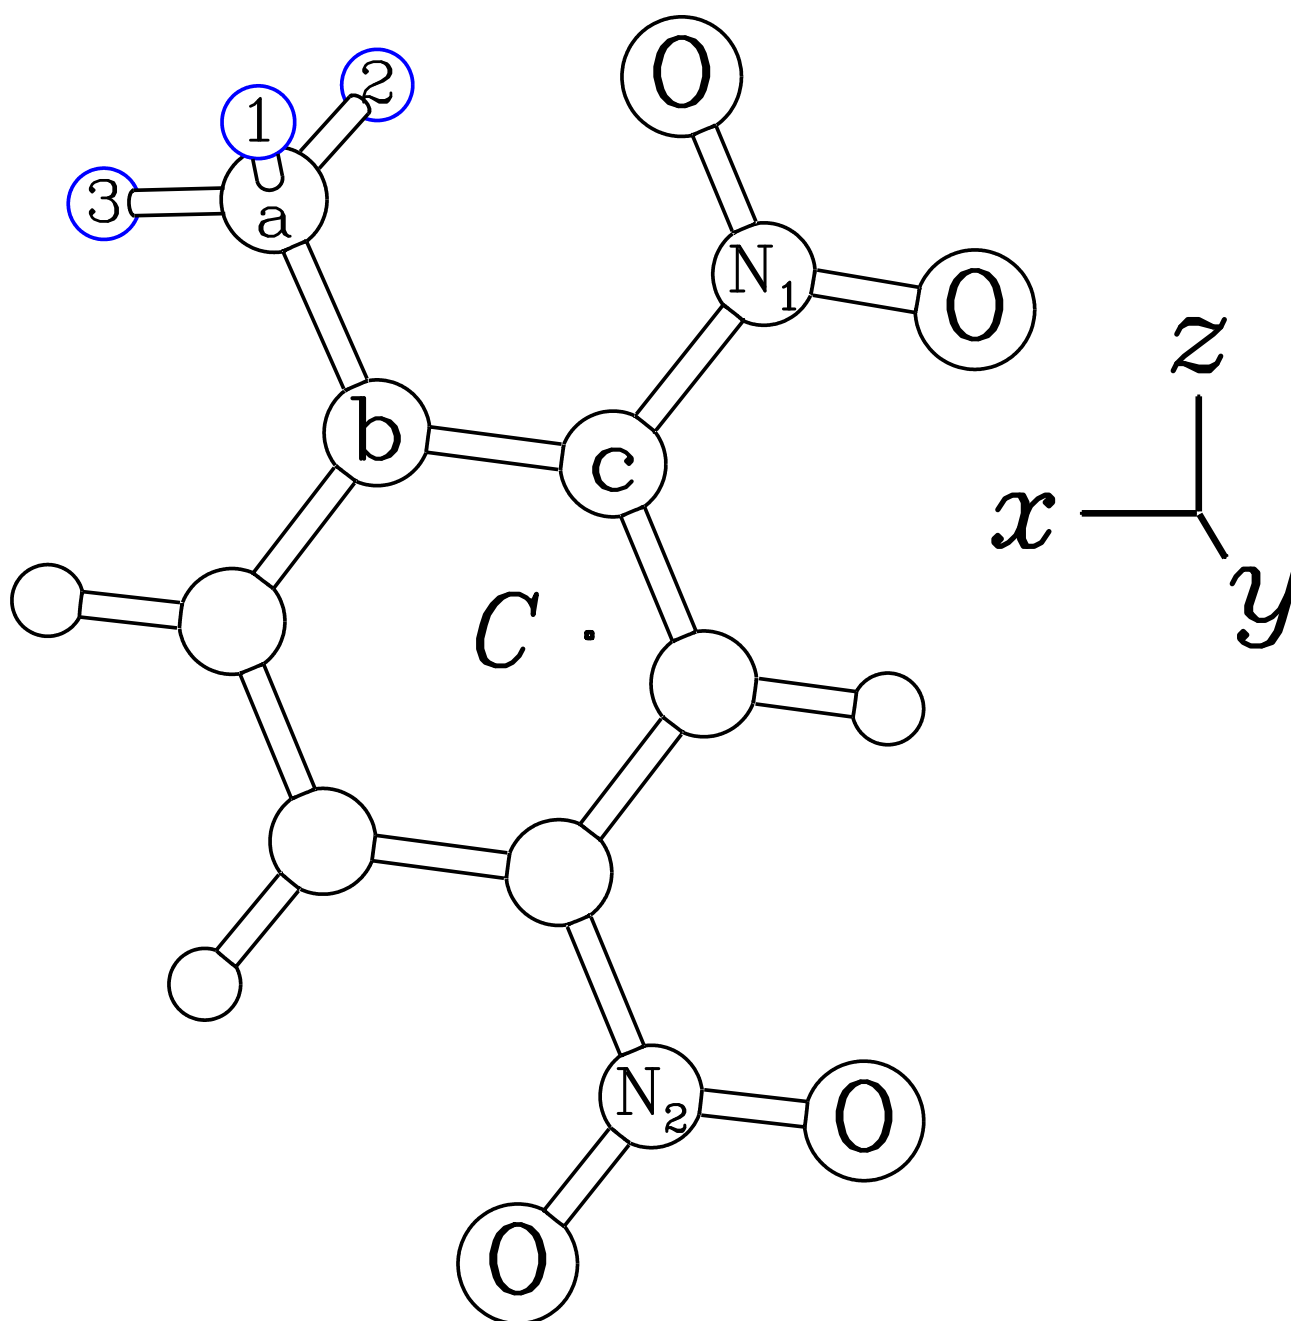

Figure S1: The molecular model used for 2,4-DNT is illustrated. It consists of a rigid planar  $C_6H_3N_2O_4$  frame and a  $C_{3v}$  methyl group. Numbers 1, 2, and 3 identify the three hydrogen atoms of this group, the letter  $a$  its carbon atom, the letters  $b$  and  $c$  two carbon atoms of the phenyl ring,  $N_1$  and  $N_2$  the two nitrogen atoms, and the letter  $C$  the molecular center of mass. The methyl group rotates about an axis parallel to the  $C_aC_b$  bond. In agreement with the paper, the torsional angle  $\alpha$  is the dihedral angle  $\angle H_1C_aC_bC_c$ . The molecular fixed  $xyz$  axis system coincides with the principal axis system and the  $I'$  representation is used. The molecule fixed  $xyz$  axis system is not drawn at the molecular center of mass for clarity.

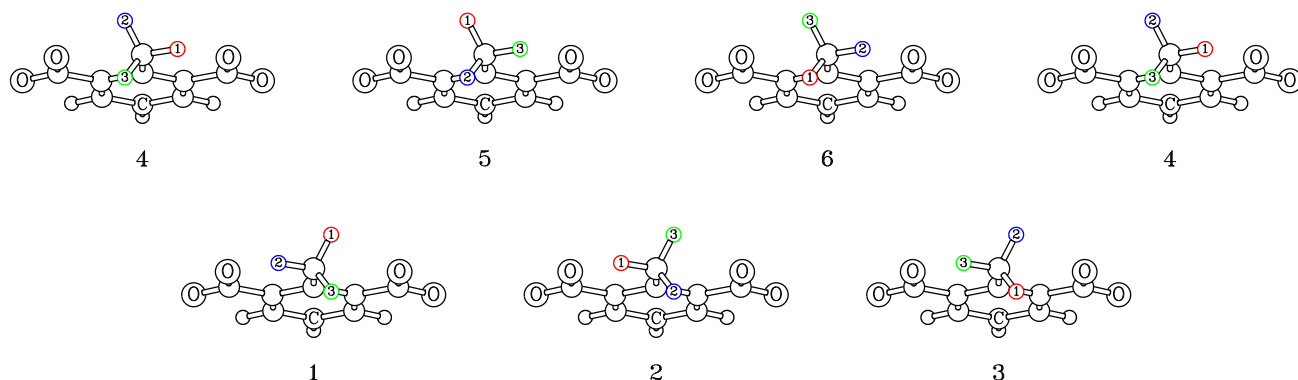

Figure S2: The geometry of the 6 minima of the 2,6-DNT isomer 2-dimensional potential energy surface drawn in the upper panel of Fig. 3 and corresponding to methyl group torsion in the weak steric hindrance limit. The numbering of the 6 minima is the same as in this figure. The hydrogen atoms of the methyl group are numbered 1 through 3 and drawn respectively in red, blue, and green.

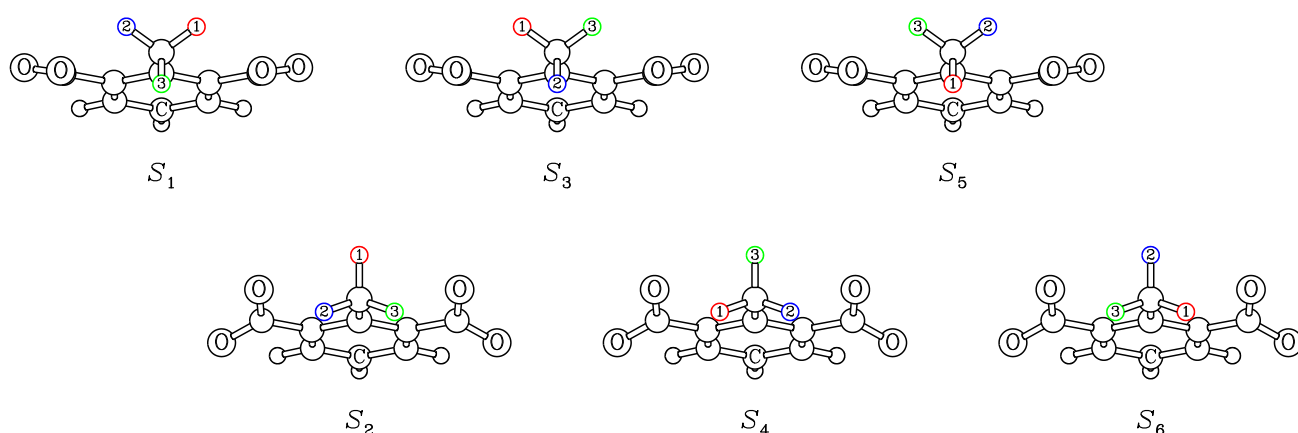

Figure S3: The geometry of the 6 stationary points of the 2,6-DNT isomer 2-dimensional potential energy surface drawn in the upper panel of Fig. 3 and corresponding to methyl group torsion in the weak steric hindrance limit. The labeling of the 6 stationary points is the same as in this figure. The hydrogen atoms of the methyl group are numbered 1 through 3 and drawn respectively in red, blue, and green.

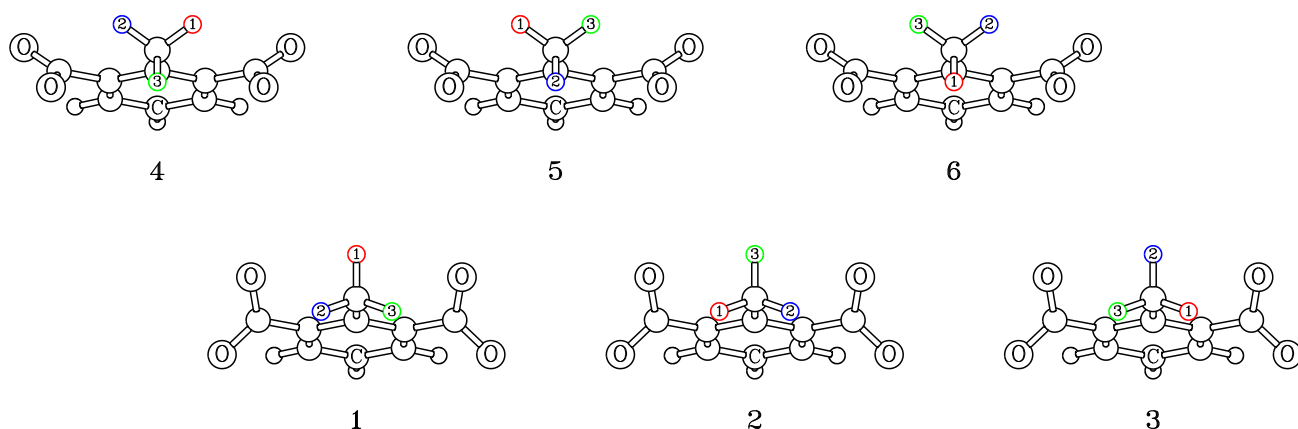

Figure S4: The geometry of the 6 minima of the 2,6-DNT isomer 2-dimensional potential energy surface drawn in the lower panel of Fig. 3 and corresponding to methyl group torsion in the strong steric hindrance limit. The numbering of the 6 minima is the same as in this figure. The hydrogen atoms of the methyl group are numbered 1 through 3 and drawn respectively in red, blue, and green.

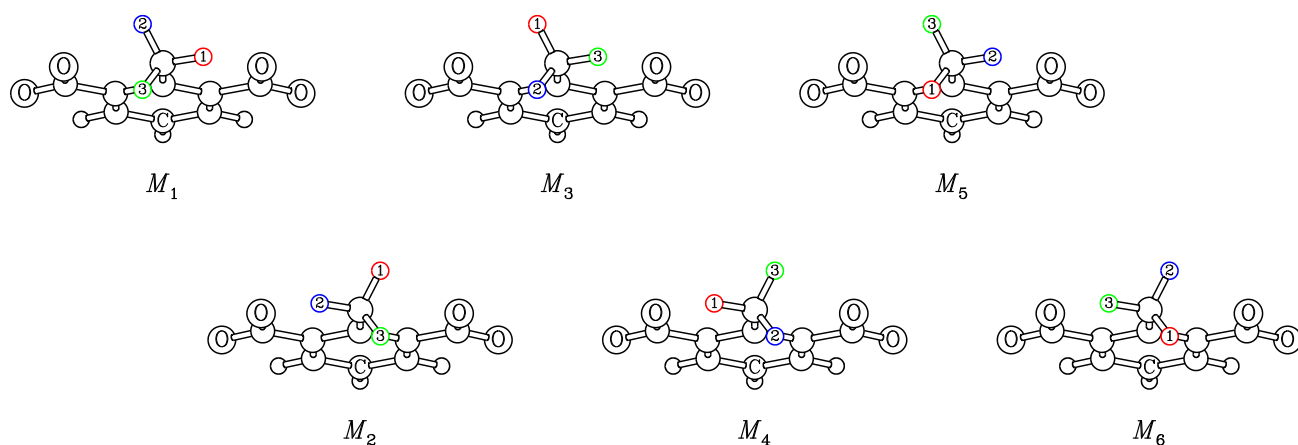

Figure S5: The geometry of the 6 maxima of the 2,6-DNT isomer 2-dimensional potential energy surface drawn in the lower panel of Fig. 3 and corresponding to methyl group torsion in the strong steric hindrance limit. The numbering of the 6 maxima is the same as in this figure. The hydrogen atoms of the methyl group are numbered 1 through 3 and are drawn respectively in red, blue, and green.

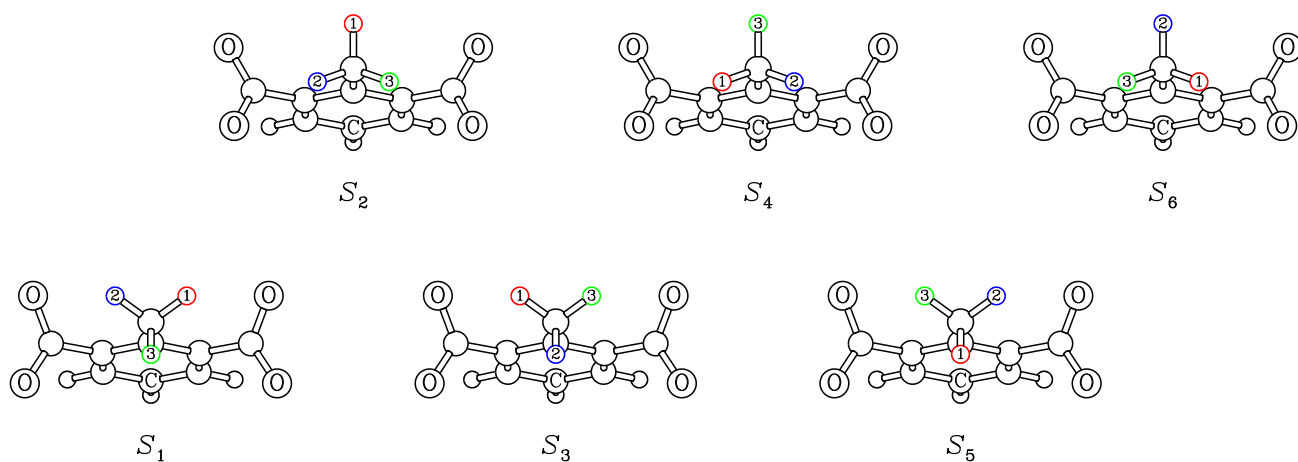

Figure S6: The geometry of the 6 stationary points of the 2,6-DNT isomer 2-dimensional potential energy surface drawn in the lower panel of Fig. 3 and corresponding to methyl group torsion in the strong steric hindrance limit. The numbering of the 6 stationary points is the same as in this figure. The hydrogen atoms of the methyl group are numbered 1 through 3 and are drawn respectively in red, blue, and green.

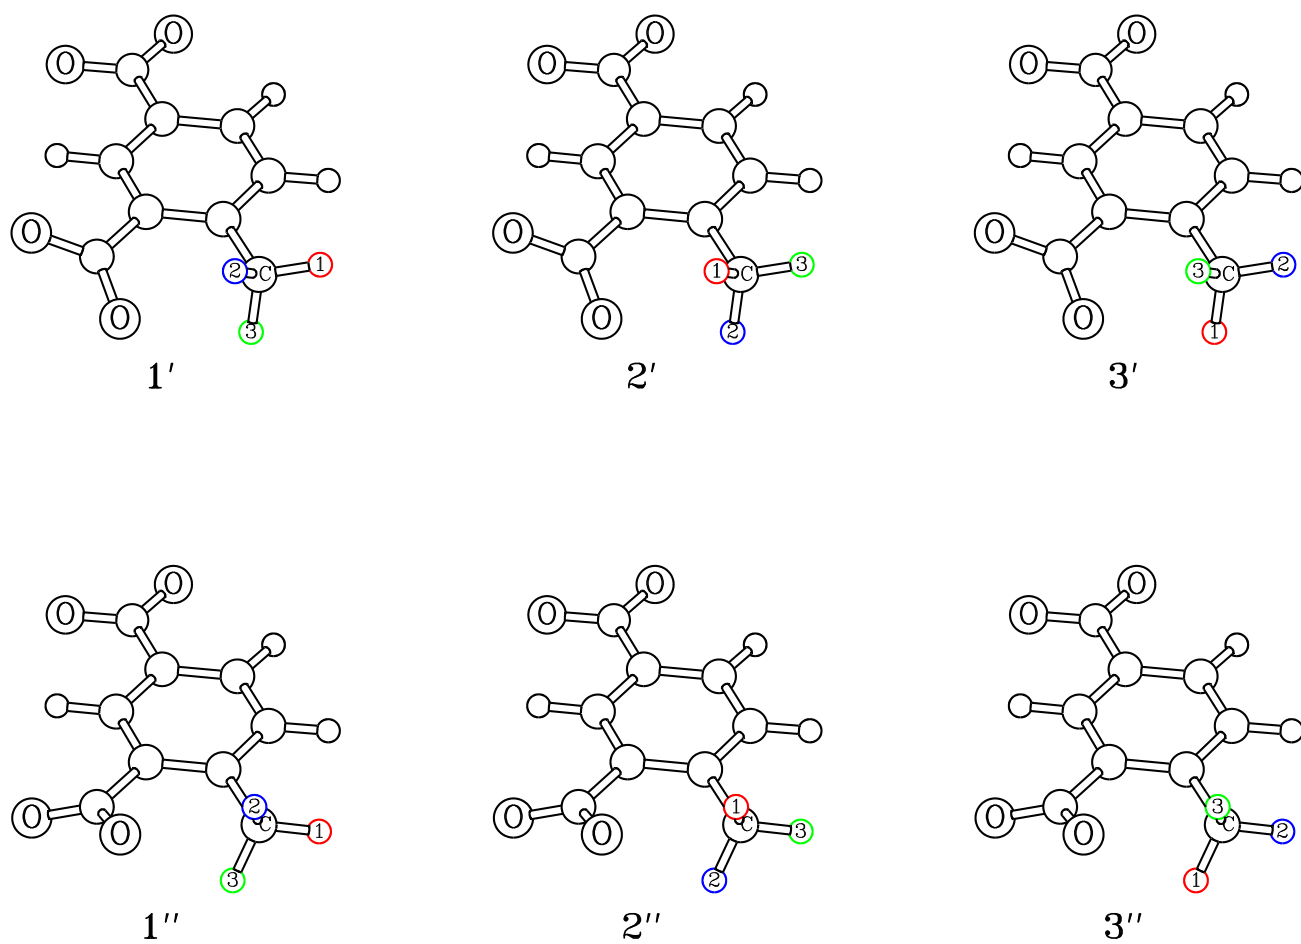

Figure S7: The geometry of the 6 minima of the 2,4-DNT isomer 2-dimensional potential energy surface drawn in Fig. 6. The minima are labeled using the pair identifier with a prime sign (') or double prime sign (''). The hydrogen atoms of the methyl group are numbered 1 through 3 and drawn respectively in red, blue, and green.



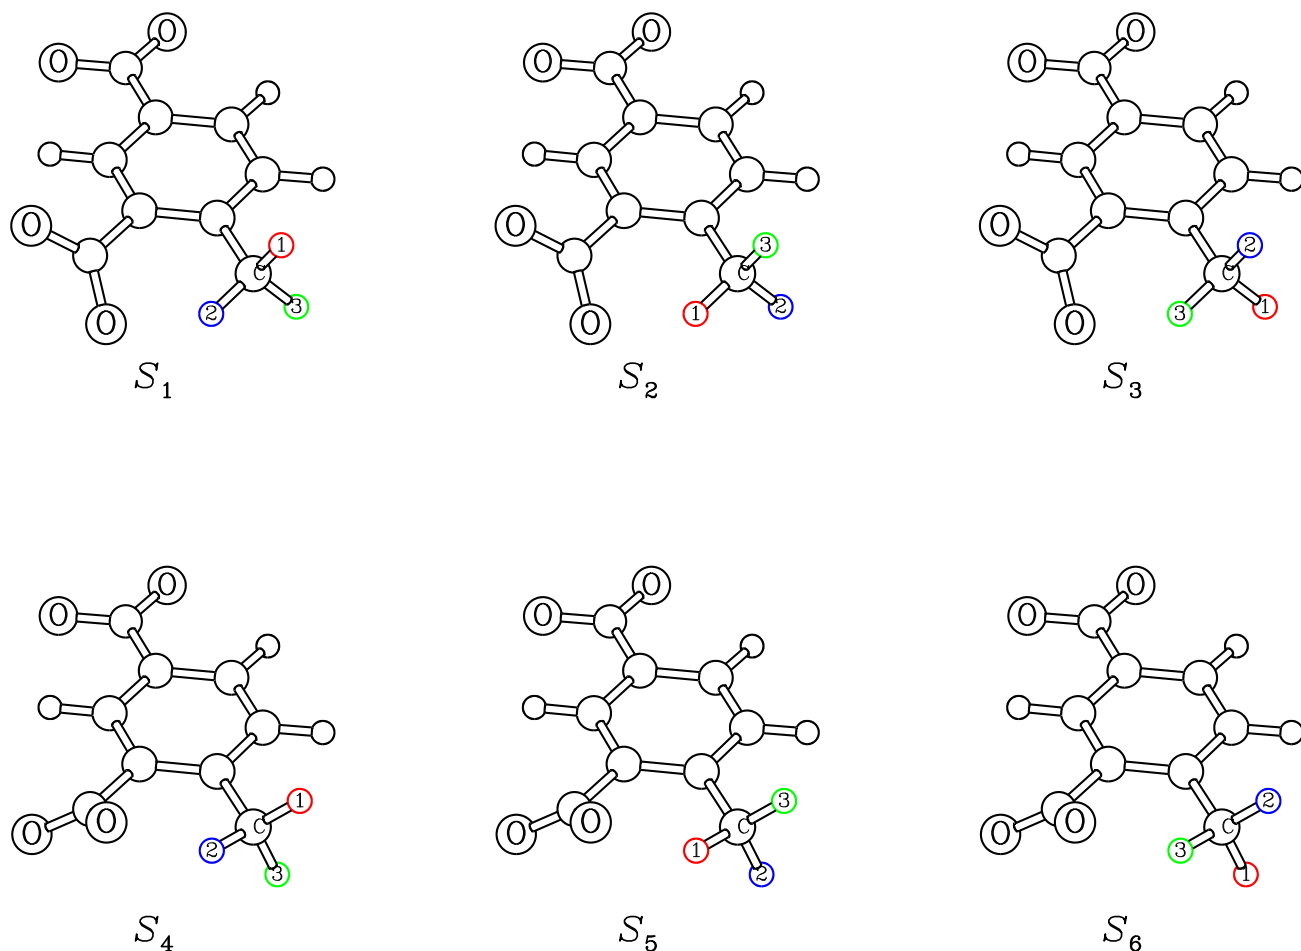

Figure S8: The geometry of the 6 stationary points of the 2,4-DNT isomer 2-dimensional potential energy surface drawn in Fig. 6. The labeling of the stationary points is the same as in this figure. The hydrogen atoms of the methyl group are numbered 1 through 3 and are drawn respectively in red, blue, and green.

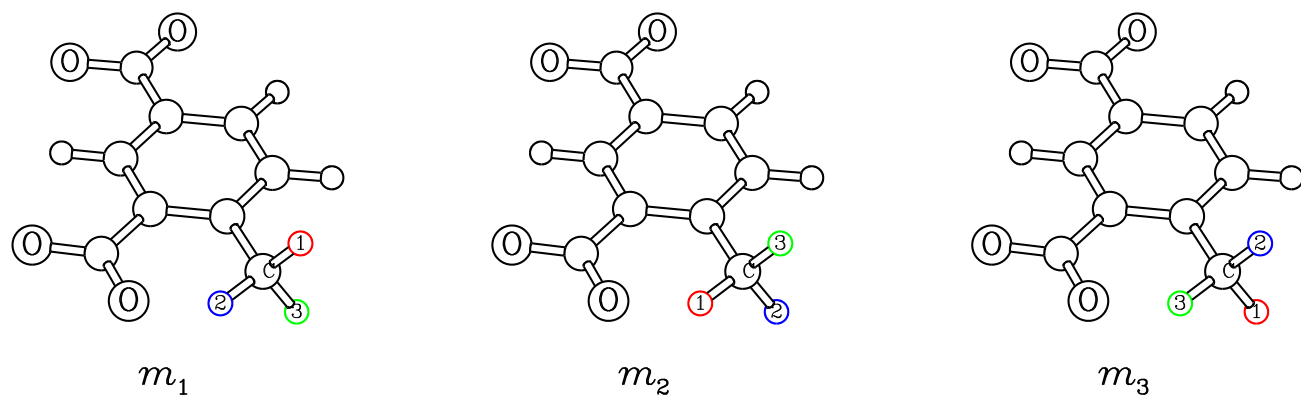

Figure S9: The geometry of the 3 local minima of the 2,4-DNT isomer 2-dimensional potential energy surface drawn in Fig. 6. The labeling of the local minima is the same as in this figure. The hydrogen atoms of the methyl group are numbered 1 through 3 and are drawn respectively in red, blue, and green.

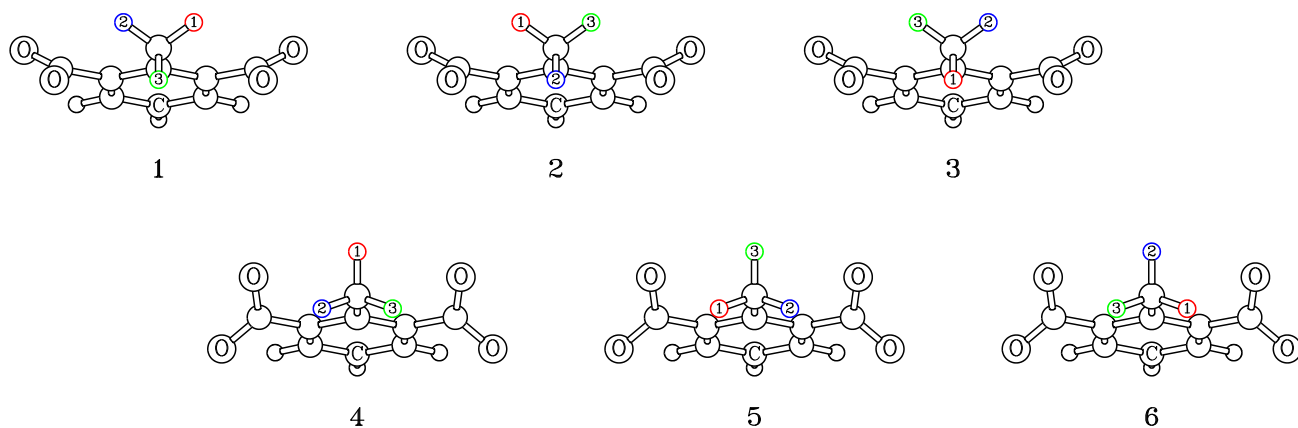

Figure S10: The geometry of the 6 minima of the 2,6-DNT isomer 2-dimensional potential energy surface drawn in Fig. 8. The numbering of the 6 minima is the same as in this figure. The hydrogen atoms of the methyl group are numbered 1 through 3 and drawn respectively in red, blue, and green.

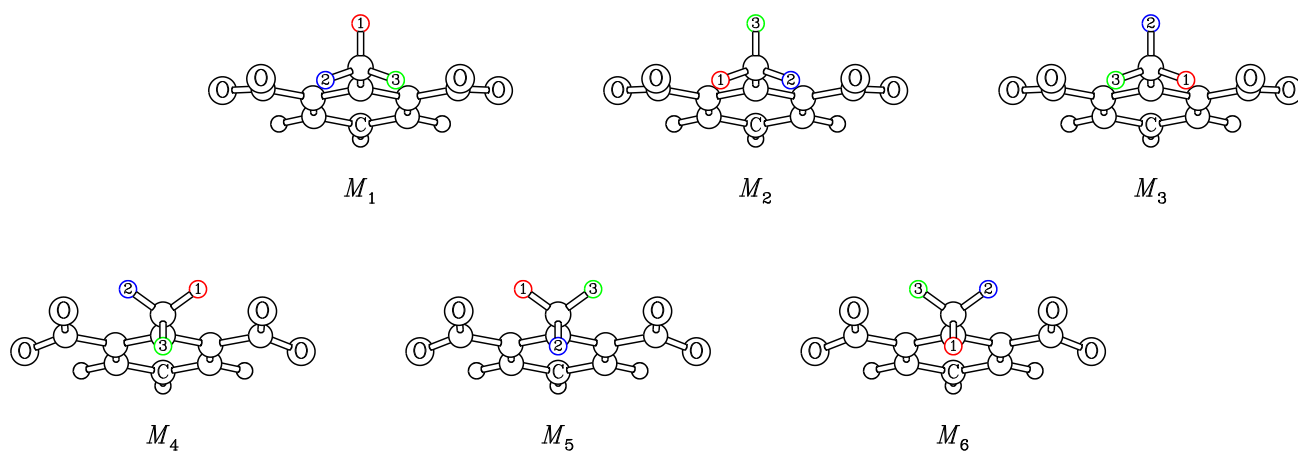

Figure S11: The geometry of the 6 maxima of the 2,6-DNT isomer 2-dimensional potential energy surface drawn in Fig. 8. The numbering of the 6 maxima is the same as in this figure. The hydrogen atoms of the methyl group are numbered 1 through 3 and drawn respectively in red, blue, and green.

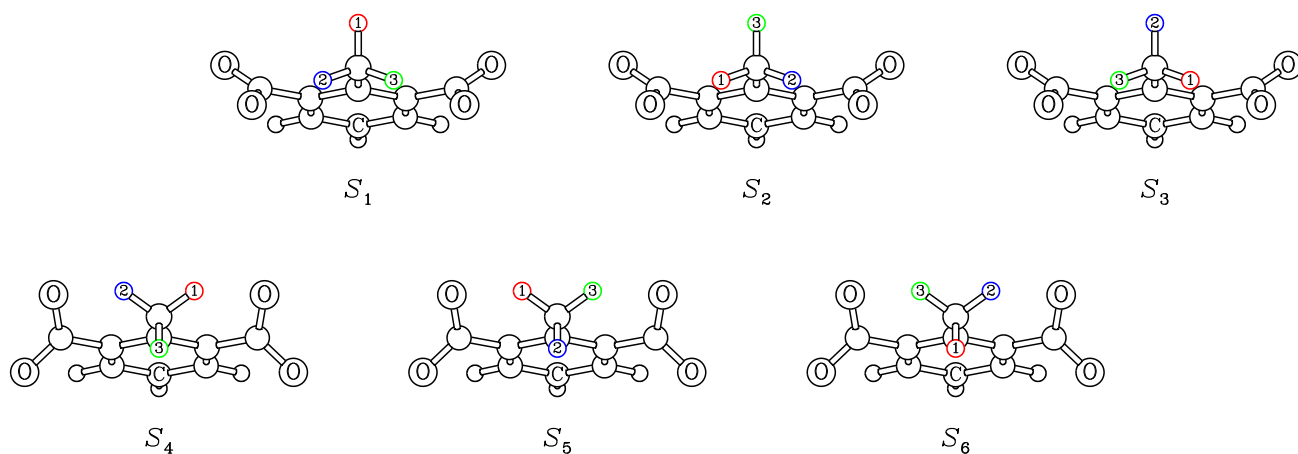

Figure S12: The geometry of the 6 stationary points of the 2,6-DNT isomer 2-dimensional potential energy surface drawn in Fig. 8. The numbering of the 6 stationary points is the same as in this figure. The hydrogen atoms of the methyl group are numbered 1 through 3 and drawn respectively in red, blue, and green.

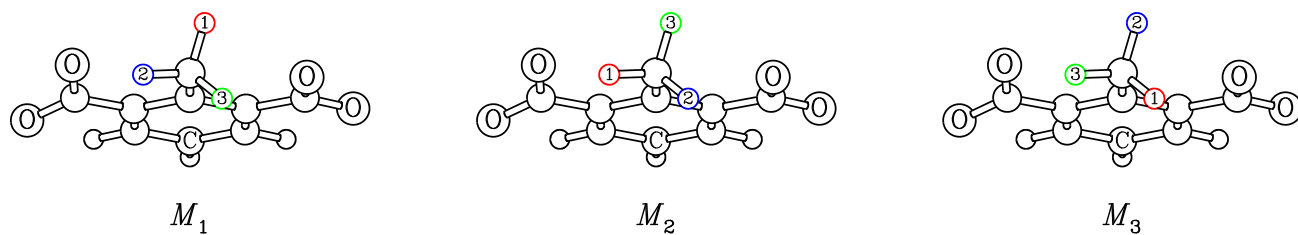

Figure S13: The geometry of the 3 maxima of the 2,6-DNT isomer 2-dimensional potential energy surface drawn in Fig. 10. The numbering of the 3 maxima is the same as in this figure. The hydrogen atoms of the methyl group are numbered 1 through 3 and drawn respectively in red, blue, and green.

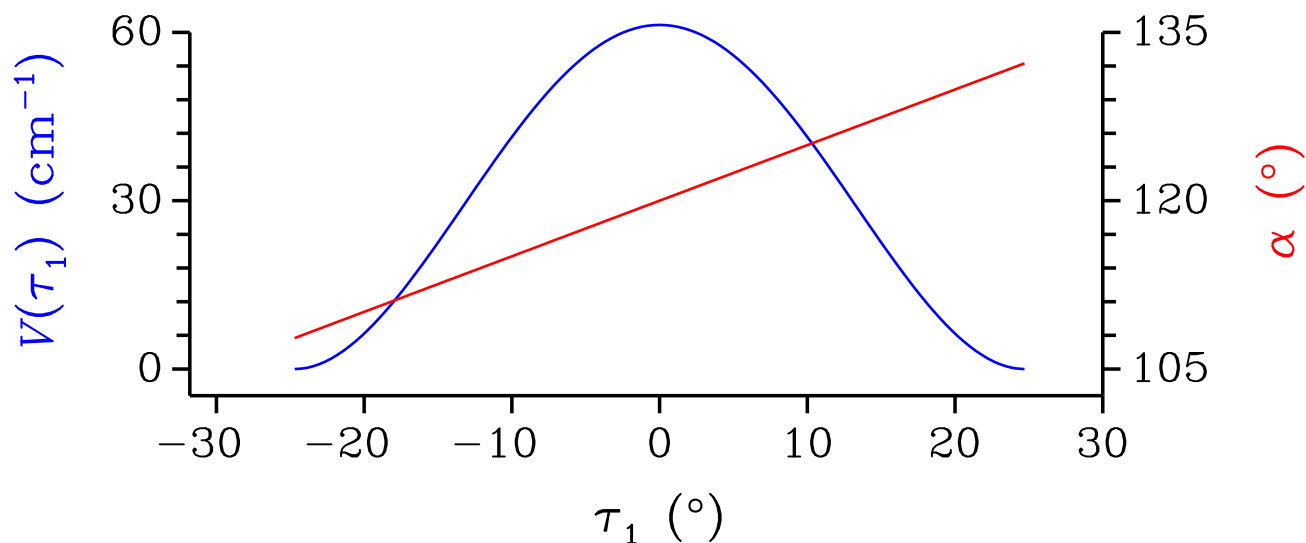

Figure S14: A cut of the 2-D potential energy surface of 2,4-DNT, as calculated at the B98/cc-pVTZ level of theory in the paper and shown in Fig. 6. The cut corresponds to a tunneling path allowing us to connect the two minima belonging to Pair 1. The potential energy, in  $\text{cm}^{-1}$ , blue curve, and the angle  $\alpha$ , in degrees, red curve, are plotted as a function of the angle  $\tau$ . The  $y$ -axes on the left and on the right should be used for the potential energy and the angle  $\alpha$ , respectively.

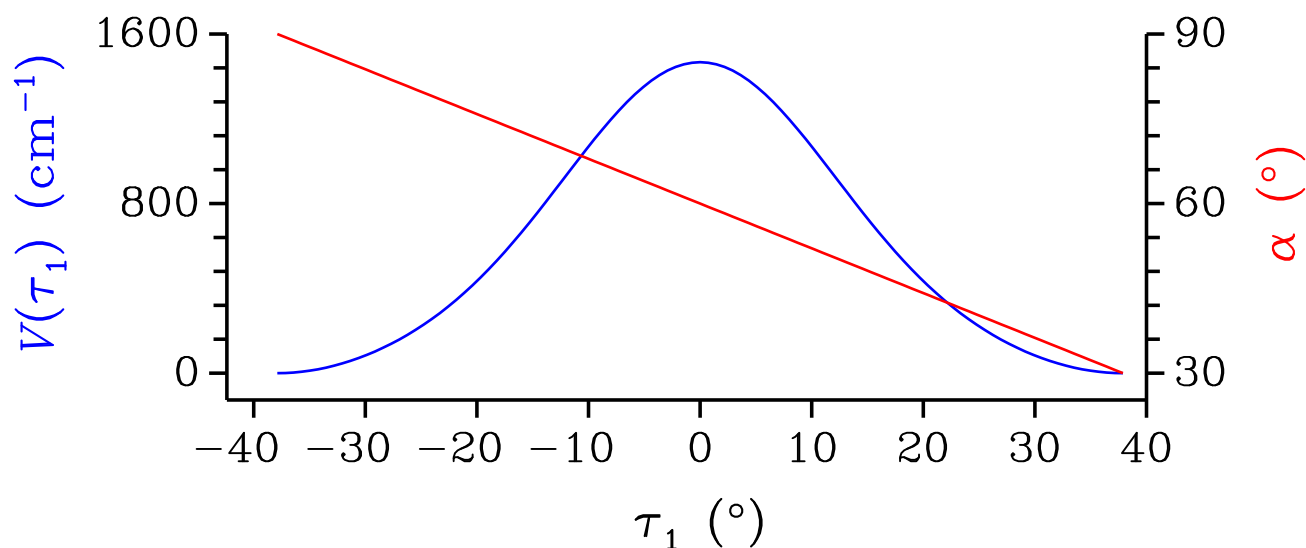

Figure S15: A cut of the 2-D potential energy surface of 2,6-DNT, as calculated at the B98/cc-pVTZ level of theory in the paper and shown in Fig. 8. The cut corresponds to the  $1 \rightarrow 4$  tunneling path allowing us to go from equilibrium configuration 1 to equilibrium configuration 4. The potential energy, in  $\text{cm}^{-1}$ , blue curve, and the angle  $\alpha$ , in degrees, red curve, are plotted as a function of the angle  $\tau$ . The  $y$ -axes on the left and on the right should be used for the potential energy and the angle  $\alpha$ , respectively.

## References

- [1] J. T. Hougen, *J. Mol. Spectrosc.*, 1985, **114**, 395–426.
- [2] R. Brent, *ACM Transactions on Mathematical Software*, 1978, **4**, 71–81.
- [3] L. H. Coudert and J. T. Hougen, *J. Mol. Spectrosc.*, 1988, **130**, 86–119.

Table S1: Measured frequencies ( $\nu_{\text{obs.}}$ ) and residuals ( $\nu_{\text{obs.}} - \nu_{\text{calc.}}$ ) in MHz of the 2,4 dinitrotoluene isomer

| $J'$ | $K'_a$ | $K'_c$ | $I'$ | $F'$ | $\leftarrow$ | $J''$ | $K''_a$ | $K''_c$ | $I''$ | $F''$ | $\nu_{\text{obs.}}$ | $\nu_{\text{obs.}} - \nu_{\text{calc.}}$ | exp. error |
|------|--------|--------|------|------|--------------|-------|---------|---------|-------|-------|---------------------|------------------------------------------|------------|
| 5    | 1      | 5      | 1    | 6    | $\leftarrow$ | 4     | 0       | 4       | 1     | 5     | 4871.7010           | 0.0044                                   | 0.002      |
| 5    | 1      | 5      | 1    | 4    | $\leftarrow$ | 4     | 0       | 4       | 1     | 3     | 4871.7010           | 0.0060                                   | 0.002      |
| 3    | 2      | 1      | 2    | 5    | $\leftarrow$ | 2     | 1       | 2       | 2     | 4     | 6182.3274           | -0.0029                                  | 0.001      |
| 3    | 2      | 1      | 1    | 4    | $\leftarrow$ | 2     | 1       | 2       | 1     | 3     | 6182.4987           | -0.0002                                  | 0.001      |
| 7    | 1      | 7      | 2    | 7    | $\leftarrow$ | 6     | 0       | 6       | 2     | 6     | 6293.7429           | 0.0001                                   | 0.002      |
| 7    | 1      | 7      | 2    | 9    | $\leftarrow$ | 6     | 0       | 6       | 2     | 8     | 6293.8170           | 0.0016                                   | 0.002      |
| 8    | 4      | 4      | 2    | 8    | $\leftarrow$ | 8     | 3       | 5       | 2     | 8     | 6683.1789           | 0.0041                                   | 0.005      |
| 8    | 0      | 8      | 2    | 7    | $\leftarrow$ | 7     | 1       | 7       | 2     | 6     | 6838.8531           | -0.0007                                  | 0.005      |
| 8    | 0      | 8      | 2    | 6    | $\leftarrow$ | 7     | 1       | 7       | 2     | 5     | 6838.8587           | -0.0020                                  | 0.005      |
| 8    | 0      | 8      | 2    | 8    | $\leftarrow$ | 7     | 1       | 7       | 2     | 7     | 6838.8587           | -0.0017                                  | 0.005      |
| 8    | 0      | 8      | 0    | 8    | $\leftarrow$ | 7     | 1       | 7       | 0     | 7     | 6838.8668           | 0.0000                                   | 0.005      |
| 8    | 0      | 8      | 1    | 7    | $\leftarrow$ | 7     | 1       | 7       | 1     | 6     | 6838.8668           | -0.0021                                  | 0.005      |
| 8    | 0      | 8      | 1    | 9    | $\leftarrow$ | 7     | 1       | 7       | 1     | 8     | 6838.8668           | 0.0037                                   | 0.005      |
| 8    | 0      | 8      | 1    | 8    | $\leftarrow$ | 7     | 1       | 7       | 1     | 7     | 6838.8668           | -0.0017                                  | 0.005      |
| 8    | 0      | 8      | 2    | 9    | $\leftarrow$ | 7     | 1       | 7       | 2     | 8     | 6838.8739           | 0.0019                                   | 0.005      |
| 8    | 0      | 8      | 2    | 10   | $\leftarrow$ | 7     | 1       | 7       | 2     | 9     | 6838.8739           | 0.0008                                   | 0.005      |
| 7    | 2      | 5      | 1    | 6    | $\leftarrow$ | 6     | 2       | 4       | 1     | 5     | 7137.5173           | -0.0001                                  | 0.002      |
| 7    | 2      | 5      | 2    | 8    | $\leftarrow$ | 6     | 2       | 4       | 2     | 7     | 7137.5173           | -0.0001                                  | 0.002      |
| 7    | 2      | 5      | 2    | 6    | $\leftarrow$ | 6     | 2       | 4       | 2     | 5     | 7137.5246           | 0.0003                                   | 0.002      |
| 7    | 2      | 5      | 1    | 8    | $\leftarrow$ | 6     | 2       | 4       | 1     | 7     | 7137.5246           | -0.0005                                  | 0.002      |
| 7    | 2      | 5      | 2    | 5    | $\leftarrow$ | 6     | 2       | 4       | 2     | 4     | 7137.5246           | -0.0017                                  | 0.002      |
| 7    | 2      | 5      | 0    | 7    | $\leftarrow$ | 6     | 2       | 4       | 0     | 6     | 7137.5246           | -0.0018                                  | 0.002      |
| 7    | 2      | 5      | 1    | 7    | $\leftarrow$ | 6     | 2       | 4       | 1     | 6     | 7137.5246           | -0.0026                                  | 0.002      |
| 7    | 2      | 5      | 2    | 9    | $\leftarrow$ | 6     | 2       | 4       | 2     | 8     | 7137.5246           | -0.0026                                  | 0.002      |
| 9    | 0      | 9      | 2    | 8    | $\leftarrow$ | 8     | 1       | 8       | 2     | 7     | 7700.3406           | -0.0001                                  | 0.002      |
| 9    | 0      | 9      | 1    | 10   | $\leftarrow$ | 8     | 1       | 8       | 1     | 9     | 7700.3487           | 0.0010                                   | 0.002      |
| 9    | 0      | 9      | 2    | 10   | $\leftarrow$ | 8     | 1       | 8       | 2     | 9     | 7700.3534           | -0.0003                                  | 0.002      |
| 9    | 0      | 9      | 2    | 11   | $\leftarrow$ | 8     | 1       | 8       | 2     | 10    | 7700.3588           | 0.0010                                   | 0.002      |
| 6    | 2      | 5      | 2    | 8    | $\leftarrow$ | 5     | 1       | 4       | 2     | 7     | 7736.6670           | -0.0034                                  | 0.001      |
| 6    | 2      | 5      | 0    | 6    | $\leftarrow$ | 5     | 1       | 4       | 0     | 5     | 7736.6757           | 0.0010                                   | 0.001      |
| 6    | 2      | 5      | 1    | 6    | $\leftarrow$ | 5     | 1       | 4       | 1     | 5     | 7736.6867           | 0.0013                                   | 0.001      |
| 6    | 2      | 5      | 2    | 4    | $\leftarrow$ | 5     | 1       | 4       | 2     | 3     | 7736.6936           | 0.0022                                   | 0.001      |
| 10   | 2      | 9      | 2    | 10   | $\leftarrow$ | 9     | 2       | 8       | 2     | 9     | 9248.9131           | 0.0008                                   | 0.002      |
| 10   | 2      | 9      | 2    | 9    | $\leftarrow$ | 9     | 2       | 8       | 2     | 8     | 9248.9296           | 0.0021                                   | 0.005      |
| 10   | 2      | 9      | 1    | 11   | $\leftarrow$ | 9     | 2       | 8       | 1     | 10    | 9248.9296           | 0.0005                                   | 0.005      |
| 10   | 2      | 9      | 1    | 10   | $\leftarrow$ | 9     | 2       | 8       | 1     | 9     | 9248.9461           | -0.0009                                  | 0.005      |
| 10   | 2      | 9      | 2    | 8    | $\leftarrow$ | 9     | 2       | 8       | 2     | 7     | 9248.9461           | 0.0004                                   | 0.005      |
| 10   | 2      | 9      | 2    | 12   | $\leftarrow$ | 9     | 2       | 8       | 2     | 11    | 9248.9461           | -0.0014                                  | 0.005      |
| 10   | 2      | 9      | 0    | 10   | $\leftarrow$ | 9     | 2       | 8       | 0     | 9     | 9248.9461           | -0.0004                                  | 0.005      |
| 9    | 2      | 8      | 2    | 9    | $\leftarrow$ | 8     | 1       | 7       | 2     | 8     | 9399.8607           | -0.0018                                  | 0.005      |
| 9    | 2      | 8      | 1    | 8    | $\leftarrow$ | 8     | 1       | 7       | 2     | 7     | 9399.8689           | 0.0005                                   | 0.002      |
| 5    | 3      | 2      | 2    | 5    | $\leftarrow$ | 4     | 2       | 3       | 2     | 4     | 9948.9115           | 0.0025                                   | 0.002      |
| 12   | 0      | 12     | 2    | 12   | $\leftarrow$ | 11    | 1       | 11      | 2     | 11    | 10 204.5764         | -0.0038                                  | 0.002      |
| 6    | 2      | 4      | 2    | 4    | $\leftarrow$ | 5     | 1       | 5       | 2     | 3     | 10 654.4884         | -0.0001                                  | 0.001      |
| 6    | 2      | 4      | 2    | 6    | $\leftarrow$ | 5     | 1       | 5       | 2     | 5     | 10 655.1736         | -0.0001                                  | 0.001      |

| $J'$ | $K'_a$ | $K'_c$ | $I'$ | $F'$ | $\leftarrow$ | $J''$ | $K''_a$ | $K''_c$ | $I''$ | $F''$ | $\nu_{\text{obs.}}$ | $\nu_{\text{obs.}} - \nu_{\text{calc.}}$ | exp. error |
|------|--------|--------|------|------|--------------|-------|---------|---------|-------|-------|---------------------|------------------------------------------|------------|
| 11   | 4      | 8      | 2    | 11   | $\leftarrow$ | 10    | 4       | 7       | 2     | 10    | 10 723.8987         | -0.0001                                  | 0.002      |
| 11   | 4      | 8      | 2    | 12   | $\leftarrow$ | 10    | 4       | 7       | 2     | 11    | 10 723.9135         | 0.0022                                   | 0.002      |
| 11   | 4      | 8      | 1    | 10   | $\leftarrow$ | 10    | 4       | 7       | 1     | 9     | 10 723.9135         | 0.0017                                   | 0.002      |
| 11   | 4      | 8      | 2    | 13   | $\leftarrow$ | 10    | 4       | 7       | 2     | 12    | 10 723.9289         | 0.0011                                   | 0.005      |
| 11   | 4      | 8      | 0    | 11   | $\leftarrow$ | 10    | 4       | 7       | 0     | 10    | 10 723.9289         | 0.0006                                   | 0.005      |
| 11   | 4      | 8      | 1    | 11   | $\leftarrow$ | 10    | 4       | 7       | 1     | 10    | 10 723.9289         | 0.0007                                   | 0.005      |
| 11   | 4      | 8      | 2    | 9    | $\leftarrow$ | 10    | 4       | 7       | 2     | 8     | 10 723.9289         | 0.0002                                   | 0.005      |
| 4    | 4      | 1      | 2    | 6    | $\leftarrow$ | 3     | 3       | 0       | 2     | 5     | 10 897.1957         | 0.0004                                   | 0.002      |
| 4    | 4      | 0      | 2    | 6    | $\leftarrow$ | 3     | 3       | 1       | 2     | 5     | 10 898.1865         | 0.0008                                   | 0.005      |
| 4    | 4      | 0      | 1    | 3    | $\leftarrow$ | 3     | 3       | 1       | 1     | 2     | 10 898.2149         | -0.0001                                  | 0.005      |
| 4    | 4      | 0      | 2    | 2    | $\leftarrow$ | 3     | 3       | 1       | 2     | 1     | 10 898.2149         | -0.0005                                  | 0.005      |
| 4    | 4      | 0      | 2    | 5    | $\leftarrow$ | 3     | 3       | 1       | 2     | 4     | 10 898.2149         | -0.0034                                  | 0.005      |
| 4    | 4      | 0      | 2    | 4    | $\leftarrow$ | 3     | 3       | 1       | 2     | 3     | 10 898.2673         | -0.0001                                  | 0.005      |
| 13   | 0      | 13     | 2    | 13   | $\leftarrow$ | 12    | 1       | 12      | 2     | 12    | 11 027.7449         | -0.0003                                  | 0.005      |
| 13   | 0      | 13     | 2    | 12   | $\leftarrow$ | 12    | 1       | 12      | 2     | 11    | 11 027.7449         | -0.0026                                  | 0.005      |
| 13   | 0      | 13     | 1    | 12   | $\leftarrow$ | 12    | 1       | 12      | 1     | 11    | 11 027.7532         | 0.0023                                   | 0.005      |
| 13   | 0      | 13     | 2    | 14   | $\leftarrow$ | 12    | 1       | 12      | 2     | 13    | 11 027.7532         | 0.0008                                   | 0.005      |
| 13   | 0      | 13     | 2    | 11   | $\leftarrow$ | 12    | 1       | 12      | 2     | 10    | 11 027.7532         | 0.0004                                   | 0.005      |
| 13   | 0      | 13     | 1    | 14   | $\leftarrow$ | 12    | 1       | 12      | 1     | 13    | 11 027.7532         | 0.0026                                   | 0.005      |
| 13   | 0      | 13     | 0    | 13   | $\leftarrow$ | 12    | 1       | 12      | 0     | 12    | 11 027.7568         | 0.0017                                   | 0.005      |
| 13   | 0      | 13     | 1    | 13   | $\leftarrow$ | 12    | 1       | 12      | 1     | 12    | 11 027.7568         | 0.0013                                   | 0.005      |
| 13   | 0      | 13     | 2    | 15   | $\leftarrow$ | 12    | 1       | 12      | 2     | 14    | 11 027.7568         | -0.0005                                  | 0.005      |
| 7    | 3      | 5      | 2    | 5    | $\leftarrow$ | 6     | 2       | 4       | 2     | 4     | 11 212.2672         | 0.0047                                   | 0.002      |
| 13   | 1      | 12     | 2    | 13   | $\leftarrow$ | 12    | 2       | 11      | 2     | 12    | 11 669.4783         | -0.0014                                  | 0.002      |
| 13   | 1      | 12     | 1    | 12   | $\leftarrow$ | 12    | 2       | 11      | 1     | 11    | 11 669.4847         | -0.0023                                  | 0.005      |
| 13   | 1      | 12     | 2    | 14   | $\leftarrow$ | 12    | 2       | 11      | 2     | 13    | 11 669.4847         | -0.0032                                  | 0.005      |
| 13   | 1      | 12     | 2    | 12   | $\leftarrow$ | 12    | 2       | 11      | 2     | 11    | 11 669.4847         | 0.0007                                   | 0.005      |
| 13   | 1      | 12     | 1    | 14   | $\leftarrow$ | 12    | 2       | 11      | 1     | 13    | 11 669.4847         | -0.0010                                  | 0.005      |
| 13   | 1      | 12     | 2    | 11   | $\leftarrow$ | 12    | 2       | 11      | 2     | 10    | 11 669.4928         | 0.0018                                   | 0.005      |
| 13   | 1      | 12     | 0    | 13   | $\leftarrow$ | 12    | 2       | 11      | 0     | 12    | 11 669.4928         | 0.0005                                   | 0.005      |
| 13   | 1      | 12     | 1    | 13   | $\leftarrow$ | 12    | 2       | 11      | 1     | 12    | 11 669.4928         | 0.0002                                   | 0.005      |
| 13   | 1      | 12     | 2    | 15   | $\leftarrow$ | 12    | 2       | 11      | 2     | 14    | 11 669.4928         | -0.0008                                  | 0.005      |
| 8    | 3      | 6      | 2    | 8    | $\leftarrow$ | 7     | 2       | 5       | 2     | 7     | 11 819.3374         | -0.0054                                  | 0.005      |
| 14   | 0      | 14     | 2    | 14   | $\leftarrow$ | 13    | 1       | 13      | 2     | 13    | 11 848.8375         | -0.0002                                  | 0.003      |
| 14   | 0      | 14     | 2    | 13   | $\leftarrow$ | 13    | 1       | 13      | 2     | 12    | 11 848.8375         | -0.0024                                  | 0.003      |
| 14   | 0      | 14     | 1    | 15   | $\leftarrow$ | 13    | 1       | 13      | 1     | 14    | 11 848.8434         | 0.0008                                   | 0.003      |
| 14   | 0      | 14     | 1    | 13   | $\leftarrow$ | 13    | 1       | 13      | 1     | 12    | 11 848.8434         | 0.0008                                   | 0.003      |
| 14   | 0      | 14     | 2    | 15   | $\leftarrow$ | 13    | 1       | 13      | 2     | 14    | 11 848.8434         | -0.0005                                  | 0.003      |
| 14   | 0      | 14     | 2    | 12   | $\leftarrow$ | 13    | 1       | 13      | 2     | 11    | 11 848.8434         | -0.0011                                  | 0.003      |
| 14   | 0      | 14     | 0    | 14   | $\leftarrow$ | 13    | 1       | 13      | 0     | 13    | 11 848.8471         | 0.0005                                   | 0.003      |
| 14   | 0      | 14     | 1    | 14   | $\leftarrow$ | 13    | 1       | 13      | 1     | 13    | 11 848.8471         | 0.0002                                   | 0.003      |
| 14   | 0      | 14     | 2    | 16   | $\leftarrow$ | 13    | 1       | 13      | 2     | 15    | 11 848.8480         | -0.0005                                  | 0.003      |
| 13   | 2      | 12     | 2    | 13   | $\leftarrow$ | 12    | 1       | 11      | 2     | 12    | 11 982.1518         | -0.0030                                  | 0.004      |
| 13   | 2      | 12     | 1    | 14   | $\leftarrow$ | 12    | 1       | 11      | 1     | 13    | 11 982.1764         | -0.0038                                  | 0.005      |
| 13   | 2      | 12     | 2    | 12   | $\leftarrow$ | 12    | 1       | 11      | 2     | 11    | 11 982.1764         | -0.0037                                  | 0.005      |
| 13   | 2      | 12     | 2    | 14   | $\leftarrow$ | 12    | 1       | 11      | 2     | 13    | 11 982.1764         | -0.0032                                  | 0.005      |
| 13   | 2      | 12     | 1    | 12   | $\leftarrow$ | 12    | 1       | 11      | 1     | 11    | 11 982.1764         | -0.0036                                  | 0.005      |
| 13   | 2      | 12     | 2    | 15   | $\leftarrow$ | 12    | 1       | 11      | 2     | 14    | 11 982.2055         | 0.0005                                   | 0.002      |
| 13   | 2      | 12     | 0    | 13   | $\leftarrow$ | 12    | 1       | 11      | 0     | 12    | 11 982.2055         | 0.0004                                   | 0.002      |
| 13   | 2      | 12     | 1    | 13   | $\leftarrow$ | 12    | 1       | 11      | 1     | 12    | 11 982.2055         | 0.0002                                   | 0.002      |
| 13   | 2      | 12     | 2    | 11   | $\leftarrow$ | 12    | 1       | 11      | 2     | 10    | 11 982.2055         | 0.0002                                   | 0.002      |

| $J'$ | $K'_a$ | $K'_c$ | $I'$ | $F'$ | $\leftarrow$ | $J''$ | $K''_a$ | $K''_c$ | $I''$ | $F''$ | $\nu_{\text{obs.}}$ | $\nu_{\text{obs.}} - \nu_{\text{calc.}}$ | exp. error |
|------|--------|--------|------|------|--------------|-------|---------|---------|-------|-------|---------------------|------------------------------------------|------------|
| 7    | 2      | 5      | 2    | 9    | $\leftarrow$ | 6     | 1       | 6       | 2     | 8     | 12 552.7794         | 0.0021                                   | 0.001      |
| 7    | 2      | 5      | 2    | 7    | $\leftarrow$ | 6     | 1       | 6       | 2     | 6     | 12 553.3680         | -0.0005                                  | 0.001      |
| 15   | 0      | 15     | 2    | 15   | $\leftarrow$ | 14    | 1       | 14      | 2     | 14    | 12 668.7943         | 0.0001                                   | 0.005      |
| 15   | 0      | 15     | 2    | 14   | $\leftarrow$ | 14    | 1       | 14      | 2     | 13    | 12 668.7943         | -0.0020                                  | 0.005      |
| 15   | 0      | 15     | 1    | 14   | $\leftarrow$ | 14    | 1       | 14      | 1     | 13    | 12 668.8022         | 0.0038                                   | 0.005      |
| 15   | 0      | 15     | 2    | 16   | $\leftarrow$ | 14    | 1       | 14      | 2     | 15    | 12 668.8022         | 0.0025                                   | 0.005      |
| 15   | 0      | 15     | 2    | 13   | $\leftarrow$ | 14    | 1       | 14      | 2     | 12    | 12 668.8022         | 0.0019                                   | 0.005      |
| 15   | 0      | 15     | 0    | 15   | $\leftarrow$ | 14    | 1       | 14      | 0     | 14    | 12 668.8022         | 0.0001                                   | 0.005      |
| 15   | 0      | 15     | 1    | 16   | $\leftarrow$ | 14    | 1       | 14      | 1     | 15    | 12 668.8022         | 0.0036                                   | 0.005      |
| 15   | 0      | 15     | 1    | 15   | $\leftarrow$ | 14    | 1       | 14      | 1     | 14    | 12 668.8022         | -0.0001                                  | 0.005      |
| 15   | 0      | 15     | 2    | 17   | $\leftarrow$ | 14    | 1       | 14      | 2     | 16    | 12 668.8022         | -0.0015                                  | 0.005      |
| 14   | 2      | 13     | 2    | 14   | $\leftarrow$ | 13    | 1       | 12      | 2     | 13    | 12 734.6503         | -0.0043                                  | 0.005      |
| 14   | 2      | 13     | 2    | 13   | $\leftarrow$ | 13    | 1       | 12      | 2     | 12    | 12 734.6706         | -0.0033                                  | 0.005      |
| 14   | 2      | 13     | 2    | 15   | $\leftarrow$ | 13    | 1       | 12      | 2     | 14    | 12 734.6706         | -0.0029                                  | 0.005      |
| 14   | 2      | 13     | 1    | 13   | $\leftarrow$ | 13    | 1       | 12      | 1     | 12    | 12 734.6706         | -0.0029                                  | 0.005      |
| 14   | 2      | 13     | 1    | 15   | $\leftarrow$ | 13    | 1       | 12      | 1     | 14    | 12 734.6706         | -0.0038                                  | 0.005      |
| 14   | 2      | 13     | 0    | 14   | $\leftarrow$ | 13    | 1       | 12      | 0     | 13    | 12 734.6952         | 0.0021                                   | 0.005      |
| 14   | 2      | 13     | 2    | 12   | $\leftarrow$ | 13    | 1       | 12      | 2     | 11    | 12 734.6952         | 0.0025                                   | 0.005      |
| 14   | 2      | 13     | 2    | 16   | $\leftarrow$ | 13    | 1       | 12      | 2     | 15    | 12 734.6952         | 0.0020                                   | 0.005      |
| 14   | 2      | 13     | 1    | 14   | $\leftarrow$ | 13    | 1       | 12      | 1     | 13    | 12 734.6952         | 0.0022                                   | 0.005      |
| 15   | 1      | 14     | 2    | 15   | $\leftarrow$ | 14    | 2       | 13      | 2     | 14    | 13 403.0512         | -0.0018                                  | 0.002      |
| 15   | 1      | 14     | 2    | 14   | $\leftarrow$ | 14    | 2       | 13      | 2     | 13    | 13 403.0609         | 0.0001                                   | 0.002      |
| 15   | 1      | 14     | 1    | 16   | $\leftarrow$ | 14    | 2       | 13      | 1     | 15    | 13 403.0609         | -0.0010                                  | 0.002      |
| 15   | 1      | 14     | 1    | 14   | $\leftarrow$ | 14    | 2       | 13      | 1     | 13    | 13 403.0609         | -0.0012                                  | 0.002      |
| 15   | 1      | 14     | 2    | 16   | $\leftarrow$ | 14    | 2       | 13      | 2     | 15    | 13 403.0609         | -0.0018                                  | 0.002      |
| 15   | 1      | 14     | 2    | 13   | $\leftarrow$ | 14    | 2       | 13      | 2     | 12    | 13 403.0716         | 0.0019                                   | 0.002      |
| 15   | 1      | 14     | 0    | 15   | $\leftarrow$ | 14    | 2       | 13      | 0     | 14    | 13 403.0716         | 0.0010                                   | 0.002      |
| 15   | 1      | 14     | 1    | 15   | $\leftarrow$ | 14    | 2       | 13      | 1     | 14    | 13 403.0716         | 0.0009                                   | 0.002      |
| 16   | 0      | 16     | 2    | 16   | $\leftarrow$ | 15    | 1       | 15      | 2     | 15    | 13 488.1457         | 0.0053                                   | 0.005      |
| 16   | 0      | 16     | 2    | 15   | $\leftarrow$ | 15    | 1       | 15      | 2     | 14    | 13 488.1457         | 0.0033                                   | 0.005      |
| 16   | 0      | 16     | 1    | 15   | $\leftarrow$ | 15    | 1       | 15      | 1     | 14    | 13 488.1457         | 0.0016                                   | 0.005      |
| 16   | 0      | 16     | 2    | 14   | $\leftarrow$ | 15    | 1       | 15      | 2     | 13    | 13 488.1457         | -0.0001                                  | 0.005      |
| 16   | 0      | 16     | 0    | 16   | $\leftarrow$ | 15    | 1       | 15      | 0     | 15    | 13 488.1457         | -0.0016                                  | 0.005      |
| 16   | 0      | 16     | 1    | 16   | $\leftarrow$ | 15    | 1       | 15      | 1     | 15    | 13 488.1457         | -0.0018                                  | 0.005      |
| 16   | 1      | 16     | 2    | 16   | $\leftarrow$ | 15    | 1       | 15      | 2     | 15    | 13 488.6970         | 0.0050                                   | 0.005      |
| 16   | 1      | 16     | 2    | 15   | $\leftarrow$ | 15    | 1       | 15      | 2     | 14    | 13 488.6970         | 0.0030                                   | 0.005      |
| 16   | 1      | 16     | 1    | 15   | $\leftarrow$ | 15    | 1       | 15      | 1     | 14    | 13 488.6970         | 0.0013                                   | 0.005      |
| 16   | 1      | 16     | 2    | 14   | $\leftarrow$ | 15    | 1       | 15      | 2     | 13    | 13 488.6970         | -0.0004                                  | 0.005      |
| 16   | 1      | 16     | 0    | 16   | $\leftarrow$ | 15    | 1       | 15      | 0     | 15    | 13 488.6970         | -0.0019                                  | 0.005      |
| 16   | 1      | 16     | 1    | 16   | $\leftarrow$ | 15    | 1       | 15      | 1     | 15    | 13 488.6970         | -0.0022                                  | 0.005      |
| 16   | 1      | 16     | 2    | 16   | $\leftarrow$ | 15    | 0       | 15      | 2     | 15    | 13 489.7573         | 0.0054                                   | 0.005      |
| 16   | 1      | 16     | 2    | 15   | $\leftarrow$ | 15    | 0       | 15      | 2     | 14    | 13 489.7573         | 0.0033                                   | 0.005      |
| 16   | 1      | 16     | 1    | 15   | $\leftarrow$ | 15    | 0       | 15      | 1     | 14    | 13 489.7573         | 0.0017                                   | 0.005      |
| 16   | 1      | 16     | 2    | 14   | $\leftarrow$ | 15    | 0       | 15      | 2     | 13    | 13 489.7573         | -0.0002                                  | 0.005      |
| 16   | 1      | 16     | 0    | 16   | $\leftarrow$ | 15    | 0       | 15      | 0     | 15    | 13 489.7573         | -0.0017                                  | 0.005      |
| 16   | 1      | 16     | 1    | 16   | $\leftarrow$ | 15    | 0       | 15      | 1     | 15    | 13 489.7573         | -0.0019                                  | 0.005      |

| $J'$ | $K'_a$ | $K'_c$ | $I'$ | $F'$ | $\leftarrow$ | $J''$ | $K''_a$ | $K''_c$ | $I''$ | $F''$ | $\nu_{\text{obs.}}$ | $\nu_{\text{obs.}} - \nu_{\text{calc.}}$ | exp. error |
|------|--------|--------|------|------|--------------|-------|---------|---------|-------|-------|---------------------|------------------------------------------|------------|
| 15   | 2      | 14     | 2    | 15   | $\leftarrow$ | 14    | 1       | 13      | 2     | 14    | 13 511.9023         | -0.0029                                  | 0.002      |
| 15   | 2      | 14     | 2    | 14   | $\leftarrow$ | 14    | 1       | 13      | 2     | 13    | 13 511.9194         | -0.0009                                  | 0.002      |
| 15   | 2      | 14     | 1    | 16   | $\leftarrow$ | 14    | 1       | 13      | 1     | 15    | 13 511.9194         | -0.0016                                  | 0.002      |
| 15   | 2      | 14     | 1    | 14   | $\leftarrow$ | 14    | 1       | 13      | 1     | 13    | 13 511.9194         | -0.0004                                  | 0.002      |
| 15   | 2      | 14     | 2    | 16   | $\leftarrow$ | 14    | 1       | 13      | 2     | 15    | 13 511.9194         | -0.0006                                  | 0.002      |
| 15   | 2      | 14     | 2    | 13   | $\leftarrow$ | 14    | 1       | 13      | 2     | 12    | 13 511.9378         | 0.0030                                   | 0.002      |
| 15   | 2      | 14     | 0    | 15   | $\leftarrow$ | 14    | 1       | 13      | 0     | 14    | 13 511.9378         | 0.0024                                   | 0.002      |
| 15   | 2      | 14     | 1    | 15   | $\leftarrow$ | 14    | 1       | 13      | 1     | 14    | 13 511.9378         | 0.0025                                   | 0.002      |
| 15   | 2      | 14     | 2    | 17   | $\leftarrow$ | 14    | 1       | 13      | 2     | 16    | 13 511.9378         | 0.0020                                   | 0.002      |
| 7    | 4      | 3      | 2    | 9    | $\leftarrow$ | 6     | 3       | 4       | 2     | 8     | 13 809.1542         | 0.0021                                   | 0.002      |
| 16   | 1      | 15     | 2    | 16   | $\leftarrow$ | 15    | 2       | 14      | 2     | 15    | 14 242.9662         | -0.0017                                  | 0.002      |
| 16   | 1      | 15     | 2    | 15   | $\leftarrow$ | 15    | 2       | 14      | 2     | 14    | 14 242.9756         | -0.0004                                  | 0.002      |
| 16   | 1      | 15     | 1    | 15   | $\leftarrow$ | 15    | 2       | 14      | 1     | 14    | 14 242.9756         | -0.0011                                  | 0.002      |
| 16   | 1      | 15     | 2    | 14   | $\leftarrow$ | 15    | 2       | 14      | 2     | 13    | 14 242.9864         | 0.0018                                   | 0.002      |
| 16   | 1      | 15     | 0    | 16   | $\leftarrow$ | 15    | 2       | 14      | 0     | 15    | 14 242.9864         | 0.0009                                   | 0.002      |
| 16   | 1      | 15     | 1    | 16   | $\leftarrow$ | 15    | 2       | 14      | 1     | 15    | 14 242.9864         | 0.0009                                   | 0.002      |
| 16   | 2      | 15     | 2    | 16   | $\leftarrow$ | 15    | 2       | 14      | 2     | 15    | 14 265.5461         | -0.0011                                  | 0.002      |
| 16   | 2      | 15     | 2    | 15   | $\leftarrow$ | 15    | 2       | 14      | 2     | 14    | 14 265.5566         | -0.0001                                  | 0.002      |
| 16   | 2      | 15     | 1    | 17   | $\leftarrow$ | 15    | 2       | 14      | 1     | 16    | 14 265.5566         | -0.0011                                  | 0.002      |
| 16   | 2      | 15     | 1    | 15   | $\leftarrow$ | 15    | 2       | 14      | 1     | 14    | 14 265.5566         | -0.0004                                  | 0.002      |
| 16   | 2      | 15     | 2    | 17   | $\leftarrow$ | 15    | 2       | 14      | 2     | 16    | 14 265.5566         | -0.0009                                  | 0.002      |
| 16   | 2      | 15     | 2    | 14   | $\leftarrow$ | 15    | 2       | 14      | 2     | 13    | 14 265.5680         | 0.0015                                   | 0.002      |
| 16   | 2      | 15     | 0    | 16   | $\leftarrow$ | 15    | 2       | 14      | 0     | 15    | 14 265.5680         | 0.0007                                   | 0.002      |
| 16   | 2      | 15     | 1    | 16   | $\leftarrow$ | 15    | 2       | 14      | 1     | 15    | 14 265.5680         | 0.0007                                   | 0.002      |
| 16   | 2      | 15     | 2    | 18   | $\leftarrow$ | 15    | 2       | 14      | 2     | 17    | 14 265.5680         | 0.0001                                   | 0.002      |
| 16   | 2      | 15     | 2    | 16   | $\leftarrow$ | 15    | 1       | 14      | 2     | 15    | 14 305.3471         | -0.0031                                  | 0.002      |
| 16   | 2      | 15     | 2    | 15   | $\leftarrow$ | 15    | 1       | 14      | 2     | 14    | 14 305.3617         | -0.0007                                  | 0.002      |
| 16   | 2      | 15     | 1    | 17   | $\leftarrow$ | 15    | 1       | 14      | 1     | 16    | 14 305.3617         | -0.0015                                  | 0.002      |
| 16   | 2      | 15     | 1    | 15   | $\leftarrow$ | 15    | 1       | 14      | 1     | 14    | 14 305.3617         | -0.0002                                  | 0.002      |
| 16   | 2      | 15     | 2    | 17   | $\leftarrow$ | 15    | 1       | 14      | 2     | 16    | 14 305.3617         | -0.0006                                  | 0.002      |
| 16   | 2      | 15     | 2    | 14   | $\leftarrow$ | 15    | 1       | 14      | 2     | 13    | 14 305.3773         | 0.0032                                   | 0.002      |
| 16   | 2      | 15     | 0    | 16   | $\leftarrow$ | 15    | 1       | 14      | 0     | 15    | 14 305.3773         | 0.0025                                   | 0.002      |
| 16   | 2      | 15     | 1    | 16   | $\leftarrow$ | 15    | 1       | 14      | 1     | 15    | 14 305.3773         | 0.0026                                   | 0.002      |
| 16   | 2      | 15     | 2    | 18   | $\leftarrow$ | 15    | 1       | 14      | 2     | 17    | 14 305.3773         | 0.0021                                   | 0.002      |
| 17   | 0      | 17     | 2    | 16   | $\leftarrow$ | 16    | 1       | 16      | 2     | 15    | 14 307.1694         | 0.0024                                   | 0.002      |
| 17   | 0      | 17     | 1    | 16   | $\leftarrow$ | 16    | 1       | 16      | 1     | 15    | 14 307.1694         | 0.0011                                   | 0.002      |
| 17   | 0      | 17     | 2    | 15   | $\leftarrow$ | 16    | 1       | 16      | 2     | 14    | 14 307.1694         | -0.0005                                  | 0.002      |
| 17   | 1      | 17     | 2    | 16   | $\leftarrow$ | 16    | 1       | 16      | 2     | 15    | 14 307.4537         | 0.0015                                   | 0.002      |
| 17   | 1      | 17     | 1    | 16   | $\leftarrow$ | 16    | 1       | 16      | 1     | 15    | 14 307.4537         | 0.0001                                   | 0.002      |
| 17   | 1      | 17     | 2    | 15   | $\leftarrow$ | 16    | 1       | 16      | 2     | 14    | 14 307.4537         | -0.0014                                  | 0.002      |
| 17   | 1      | 17     | 2    | 16   | $\leftarrow$ | 16    | 0       | 16      | 2     | 15    | 14 308.0061         | 0.0023                                   | 0.002      |
| 17   | 1      | 17     | 1    | 16   | $\leftarrow$ | 16    | 0       | 16      | 1     | 15    | 14 308.0061         | 0.0010                                   | 0.002      |
| 17   | 1      | 17     | 2    | 15   | $\leftarrow$ | 16    | 0       | 16      | 2     | 14    | 14 308.0061         | -0.0007                                  | 0.002      |
| 8    | 2      | 6      | 2    | 8    | $\leftarrow$ | 7     | 1       | 7       | 2     | 7     | 14 651.5694         | -0.0002                                  | 0.001      |
| 8    | 4      | 4      | 2    | 6    | $\leftarrow$ | 7     | 3       | 5       | 2     | 5     | 14 809.2848         | -0.0015                                  | 0.001      |
| 8    | 4      | 4      | 1    | 8    | $\leftarrow$ | 7     | 3       | 5       | 1     | 7     | 14 809.2953         | 0.0001                                   | 0.001      |
| 8    | 4      | 4      | 2    | 7    | $\leftarrow$ | 7     | 3       | 5       | 2     | 6     | 14 809.3342         | -0.0008                                  | 0.001      |
| 6    | 5      | 2      | 2    | 4    | $\leftarrow$ | 5     | 4       | 1       | 2     | 3     | 14 836.0507         | 0.0015                                   | 0.002      |
| 6    | 5      | 1      | 2    | 6    | $\leftarrow$ | 5     | 4       | 2       | 2     | 5     | 14 836.6131         | -0.0018                                  | 0.002      |



| $J'$ | $K'_a$ | $K'_c$ | $I'$ | $F'$ | $\leftarrow$ | $J''$ | $K''_a$ | $K''_c$ | $I''$ | $F''$ | $\nu_{\text{obs.}}$ | $\nu_{\text{obs.}} - \nu_{\text{calc.}}$ | exp. error |
|------|--------|--------|------|------|--------------|-------|---------|---------|-------|-------|---------------------|------------------------------------------|------------|
| 17   | 1      | 16     | 2    | 16   | $\leftarrow$ | 16    | 2       | 15      | 2     | 15    | 15 073.7179         | -0.0004                                  | 0.002      |
| 17   | 1      | 16     | 1    | 16   | $\leftarrow$ | 16    | 2       | 15      | 1     | 15    | 15 073.7179         | -0.0006                                  | 0.002      |
| 17   | 1      | 16     | 2    | 15   | $\leftarrow$ | 16    | 2       | 15      | 2     | 14    | 15 073.7281         | 0.0017                                   | 0.002      |
| 17   | 2      | 16     | 2    | 17   | $\leftarrow$ | 16    | 1       | 15      | 2     | 16    | 15 108.9249         | -0.0015                                  | 0.002      |
| 17   | 2      | 16     | 2    | 16   | $\leftarrow$ | 16    | 1       | 15      | 2     | 15    | 15 108.9364         | -0.0002                                  | 0.002      |
| 17   | 2      | 16     | 1    | 16   | $\leftarrow$ | 16    | 1       | 15      | 1     | 15    | 15 108.9364         | 0.0002                                   | 0.002      |
| 17   | 2      | 16     | 1    | 18   | $\leftarrow$ | 16    | 1       | 15      | 1     | 17    | 15 108.9364         | -0.0010                                  | 0.002      |
| 17   | 2      | 16     | 2    | 18   | $\leftarrow$ | 16    | 1       | 15      | 2     | 17    | 15 108.9364         | -0.0001                                  | 0.002      |
| 17   | 2      | 16     | 2    | 15   | $\leftarrow$ | 16    | 1       | 15      | 2     | 14    | 15 108.9487         | 0.0024                                   | 0.002      |
| 17   | 2      | 16     | 0    | 17   | $\leftarrow$ | 16    | 1       | 15      | 0     | 16    | 15 108.9487         | 0.0017                                   | 0.002      |
| 17   | 2      | 16     | 1    | 17   | $\leftarrow$ | 16    | 1       | 15      | 1     | 16    | 15 108.9487         | 0.0018                                   | 0.002      |
| 17   | 2      | 16     | 2    | 19   | $\leftarrow$ | 16    | 1       | 15      | 2     | 18    | 15 108.9487         | 0.0012                                   | 0.002      |
| 18   | 0      | 18     | 2    | 16   | $\leftarrow$ | 17    | 1       | 17      | 2     | 15    | 15 126.0276         | -0.0006                                  | 0.002      |
| 18   | 1      | 18     | 2    | 16   | $\leftarrow$ | 17    | 0       | 17      | 2     | 15    | 15 126.4594         | -0.0008                                  | 0.002      |
| 7    | 5      | 3      | 2    | 9    | $\leftarrow$ | 6     | 4       | 2       | 2     | 8     | 15 795.5887         | 0.0012                                   | 0.002      |
| 7    | 5      | 3      | 2    | 7    | $\leftarrow$ | 6     | 4       | 2       | 2     | 6     | 15 795.6666         | -0.0006                                  | 0.002      |
| 7    | 5      | 2      | 2    | 5    | $\leftarrow$ | 6     | 4       | 3       | 2     | 4     | 15 797.9939         | -0.0016                                  | 0.002      |
| 7    | 5      | 2      | 2    | 8    | $\leftarrow$ | 6     | 4       | 3       | 2     | 7     | 15 798.0536         | 0.0028                                   | 0.002      |
| 7    | 5      | 2      | 2    | 7    | $\leftarrow$ | 6     | 4       | 3       | 2     | 6     | 15 798.0865         | 0.0001                                   | 0.002      |
| 18   | 1      | 17     | 1    | 17   | $\leftarrow$ | 17    | 2       | 16      | 1     | 16    | 15 899.0273         | -0.0010                                  | 0.002      |
| 18   | 1      | 17     | 2    | 17   | $\leftarrow$ | 17    | 2       | 16      | 2     | 16    | 15 899.0273         | -0.0011                                  | 0.002      |
| 18   | 1      | 17     | 2    | 19   | $\leftarrow$ | 17    | 2       | 16      | 2     | 18    | 15 899.0273         | -0.0015                                  | 0.002      |
| 18   | 1      | 17     | 1    | 19   | $\leftarrow$ | 17    | 2       | 16      | 1     | 18    | 15 899.0273         | -0.0019                                  | 0.002      |
| 18   | 1      | 17     | 2    | 16   | $\leftarrow$ | 17    | 2       | 16      | 2     | 15    | 15 899.0369         | 0.0011                                   | 0.002      |
| 18   | 1      | 17     | 0    | 18   | $\leftarrow$ | 17    | 2       | 16      | 0     | 17    | 15 899.0369         | 0.0004                                   | 0.002      |
| 18   | 1      | 17     | 1    | 18   | $\leftarrow$ | 17    | 2       | 16      | 1     | 17    | 15 899.0369         | 0.0004                                   | 0.002      |
| 18   | 1      | 17     | 2    | 20   | $\leftarrow$ | 17    | 2       | 16      | 2     | 19    | 15 899.0369         | -0.0002                                  | 0.002      |
| 18   | 2      | 17     | 2    | 18   | $\leftarrow$ | 17    | 1       | 16      | 2     | 17    | 15 918.6462         | -0.0020                                  | 0.002      |
| 18   | 2      | 17     | 2    | 17   | $\leftarrow$ | 17    | 1       | 16      | 2     | 16    | 15 918.6568         | -0.0002                                  | 0.002      |
| 18   | 2      | 17     | 1    | 17   | $\leftarrow$ | 17    | 1       | 16      | 1     | 16    | 15 918.6568         | 0.0002                                   | 0.002      |
| 18   | 2      | 17     | 1    | 19   | $\leftarrow$ | 17    | 1       | 16      | 1     | 18    | 15 918.6568         | -0.0010                                  | 0.002      |
| 18   | 2      | 17     | 2    | 19   | $\leftarrow$ | 17    | 1       | 16      | 2     | 18    | 15 918.6568         | -0.0002                                  | 0.002      |
| 18   | 2      | 17     | 2    | 16   | $\leftarrow$ | 17    | 1       | 16      | 2     | 15    | 15 918.6682         | 0.0029                                   | 0.002      |
| 18   | 2      | 17     | 0    | 18   | $\leftarrow$ | 17    | 1       | 16      | 0     | 17    | 15 918.6682         | 0.0022                                   | 0.002      |
| 18   | 2      | 17     | 1    | 18   | $\leftarrow$ | 17    | 1       | 16      | 1     | 17    | 15 918.6682         | 0.0023                                   | 0.002      |
| 18   | 2      | 17     | 2    | 20   | $\leftarrow$ | 17    | 1       | 16      | 2     | 19    | 15 918.6692         | 0.0027                                   | 0.002      |
| 19   | 2      | 18     | 2    | 19   | $\leftarrow$ | 18    | 1       | 17      | 2     | 18    | 16 732.0200         | -0.0002                                  | 0.100      |
| 19   | 2      | 18     | 2    | 18   | $\leftarrow$ | 18    | 1       | 17      | 2     | 17    | 16 732.0288         | 0.0009                                   | 0.005      |
| 19   | 2      | 18     | 1    | 18   | $\leftarrow$ | 18    | 1       | 17      | 1     | 17    | 16 732.0288         | 0.0013                                   | 0.005      |
| 19   | 2      | 18     | 1    | 20   | $\leftarrow$ | 18    | 1       | 17      | 1     | 19    | 16 732.0288         | 0.0001                                   | 0.005      |
| 19   | 2      | 18     | 2    | 20   | $\leftarrow$ | 18    | 1       | 17      | 2     | 19    | 16 732.0288         | 0.0009                                   | 0.005      |
| 19   | 2      | 18     | 2    | 17   | $\leftarrow$ | 18    | 1       | 17      | 2     | 16    | 16 732.0375         | 0.0024                                   | 0.002      |
| 19   | 2      | 18     | 0    | 19   | $\leftarrow$ | 18    | 1       | 17      | 0     | 18    | 16 732.0375         | 0.0018                                   | 0.002      |
| 19   | 2      | 18     | 1    | 19   | $\leftarrow$ | 18    | 1       | 17      | 1     | 18    | 16 732.0375         | 0.0018                                   | 0.002      |
| 19   | 2      | 18     | 2    | 21   | $\leftarrow$ | 18    | 1       | 17      | 2     | 20    | 16 732.0375         | 0.0012                                   | 0.002      |

Table S2: Measured frequencies ( $\nu_{\text{obs.}}$ ) and residuals ( $\nu_{\text{obs.}} - \nu_{\text{calc.}}$ ) in MHz of the 2,6 dinitrotoluene isomer

| $J'$ | $K'_a$ | $K'_c$ | $I'$ | $F'$ | $\leftarrow$ | $J''$ | $K''_a$ | $K''_c$ | $I''$ | $F''$ | $\nu_{\text{obs.}}$ | $\nu_{\text{obs.}} - \nu_{\text{calc.}}$ | exp. error |
|------|--------|--------|------|------|--------------|-------|---------|---------|-------|-------|---------------------|------------------------------------------|------------|
| 4    | 0      | 4      | 1    | 5    | $\leftarrow$ | 3     | 1       | 3       | 1     | 4     | 3310.7904           | -0.0020                                  | 0.002      |
| 4    | 0      | 4      | 2    | 6    | $\leftarrow$ | 3     | 1       | 3       | 2     | 5     | 3310.8243           | 0.0019                                   | 0.002      |
| 7    | 2      | 6      | 2    | 9    | $\leftarrow$ | 7     | 1       | 7       | 2     | 9     | 5111.5202           | -0.0021                                  | 0.002      |
| 7    | 1      | 6      | 2    | 9    | $\leftarrow$ | 6     | 2       | 5       | 2     | 8     | 5633.4364           | 0.0016                                   | 0.002      |
| 3    | 2      | 2      | 1    | 2    | $\leftarrow$ | 2     | 1       | 1       | 1     | 1     | 6022.9959           | -0.0017                                  | 0.002      |
| 4    | 2      | 3      | 1    | 4    | $\leftarrow$ | 3     | 1       | 2       | 1     | 3     | 6851.4975           | -0.0009                                  | 0.002      |
| 7    | 1      | 7      | 2    | 7    | $\leftarrow$ | 6     | 0       | 6       | 2     | 6     | 6870.0577           | 0.0008                                   | 0.005      |
| 7    | 1      | 7      | 2    | 6    | $\leftarrow$ | 6     | 0       | 6       | 2     | 5     | 6870.0700           | 0.0000                                   | 0.005      |
| 7    | 1      | 7      | 0    | 7    | $\leftarrow$ | 6     | 0       | 6       | 0     | 6     | 6870.0988           | -0.0001                                  | 0.000      |
| 7    | 4      | 3      | 2    | 8    | $\leftarrow$ | 7     | 3       | 4       | 2     | 8     | 7110.6056           | 0.0014                                   | 0.001      |
| 7    | 4      | 3      | 2    | 7    | $\leftarrow$ | 7     | 3       | 4       | 2     | 7     | 7110.6715           | -0.0002                                  | 0.001      |
| 6    | 4      | 2      | 2    | 6    | $\leftarrow$ | 6     | 3       | 3       | 2     | 6     | 7199.4768           | -0.0003                                  | 0.005      |
| 9    | 4      | 6      | 2    | 9    | $\leftarrow$ | 9     | 3       | 7       | 2     | 9     | 7309.1867           | -0.0004                                  | 0.002      |
| 8    | 1      | 8      | 2    | 8    | $\leftarrow$ | 7     | 0       | 7       | 2     | 7     | 7693.2749           | -0.0002                                  | 0.002      |
| 8    | 1      | 8      | 2    | 10   | $\leftarrow$ | 7     | 0       | 7       | 2     | 9     | 7693.3115           | 0.0016                                   | 0.005      |
| 3    | 3      | 1      | 2    | 5    | $\leftarrow$ | 2     | 2       | 0       | 2     | 4     | 8305.3468           | -0.0020                                  | 0.002      |
| 4    | 3      | 1      | 2    | 2    | $\leftarrow$ | 3     | 2       | 2       | 2     | 1     | 9379.9997           | -0.0011                                  | 0.002      |
| 4    | 3      | 1      | 0    | 4    | $\leftarrow$ | 3     | 2       | 2       | 0     | 3     | 9380.0237           | -0.0011                                  | 0.002      |
| 4    | 3      | 1      | 1    | 4    | $\leftarrow$ | 3     | 2       | 2       | 1     | 3     | 9380.0313           | 0.0009                                   | 0.002      |
| 4    | 3      | 1      | 2    | 6    | $\leftarrow$ | 3     | 2       | 2       | 2     | 5     | 9380.0485           | -0.0007                                  | 0.002      |
| 4    | 3      | 1      | 1    | 5    | $\leftarrow$ | 3     | 2       | 2       | 1     | 4     | 9380.1235           | -0.0009                                  | 0.002      |
| 4    | 3      | 1      | 1    | 3    | $\leftarrow$ | 3     | 2       | 2       | 1     | 2     | 9380.1482           | -0.0004                                  | 0.002      |
| 4    | 3      | 1      | 2    | 4    | $\leftarrow$ | 3     | 2       | 2       | 2     | 3     | 9380.2311           | -0.0010                                  | 0.002      |
| 11   | 0      | 11     | 2    | 11   | $\leftarrow$ | 10    | 1       | 10      | 2     | 10    | 10 237.6080         | -0.0006                                  | 0.002      |
| 11   | 1      | 11     | 2    | 11   | $\leftarrow$ | 10    | 0       | 10      | 2     | 10    | 10 285.9167         | -0.0011                                  | 0.002      |
| 11   | 1      | 11     | 2    | 11   | $\leftarrow$ | 10    | 0       | 10      | 2     | 10    | 10 285.9169         | -0.0009                                  | 0.002      |
| 5    | 3      | 2      | 2    | 3    | $\leftarrow$ | 4     | 2       | 3       | 2     | 2     | 10 475.8484         | -0.0017                                  | 0.001      |
| 5    | 3      | 2      | 2    | 7    | $\leftarrow$ | 4     | 2       | 3       | 2     | 6     | 10 475.8958         | -0.0013                                  | 0.002      |
| 5    | 3      | 2      | 1    | 4    | $\leftarrow$ | 4     | 2       | 3       | 1     | 3     | 10 475.9905         | -0.0007                                  | 0.001      |
| 5    | 3      | 2      | 2    | 5    | $\leftarrow$ | 4     | 2       | 3       | 2     | 4     | 10 476.0700         | 0.0003                                   | 0.002      |
| 11   | 1      | 10     | 2    | 9    | $\leftarrow$ | 10    | 2       | 9       | 2     | 8     | 10 568.2988         | 0.0032                                   | 0.002      |
| 11   | 1      | 10     | 0    | 11   | $\leftarrow$ | 10    | 2       | 9       | 0     | 10    | 10 568.2988         | 0.0009                                   | 0.002      |
| 11   | 1      | 10     | 1    | 11   | $\leftarrow$ | 10    | 2       | 9       | 1     | 10    | 10 568.2988         | 0.0005                                   | 0.002      |
| 11   | 1      | 10     | 2    | 10   | $\leftarrow$ | 10    | 2       | 9       | 2     | 9     | 10 568.2988         | 0.0050                                   | 0.002      |
| 11   | 1      | 10     | 2    | 13   | $\leftarrow$ | 10    | 2       | 9       | 2     | 12    | 10 568.2988         | -0.0013                                  | 0.002      |
| 11   | 1      | 10     | 1    | 10   | $\leftarrow$ | 10    | 2       | 9       | 1     | 9     | 10 568.2988         | -0.0004                                  | 0.002      |
| 11   | 1      | 10     | 1    | 12   | $\leftarrow$ | 10    | 2       | 9       | 1     | 11    | 10 568.2988         | 0.0018                                   | 0.002      |
| 11   | 1      | 10     | 2    | 12   | $\leftarrow$ | 10    | 2       | 9       | 2     | 11    | 10 568.2988         | -0.0019                                  | 0.002      |
| 11   | 1      | 10     | 2    | 11   | $\leftarrow$ | 10    | 2       | 9       | 2     | 10    | 10 568.2988         | 0.0017                                   | 0.002      |
| 10   | 2      | 9      | 1    | 11   | $\leftarrow$ | 9     | 1       | 8       | 1     | 10    | 10 857.9832         | -0.0007                                  | 0.005      |
| 10   | 2      | 9      | 2    | 9    | $\leftarrow$ | 9     | 1       | 8       | 2     | 8     | 10 857.9832         | -0.0011                                  | 0.005      |
| 10   | 2      | 9      | 2    | 11   | $\leftarrow$ | 9     | 1       | 8       | 2     | 10    | 10 857.9832         | 0.0011                                   | 0.005      |
| 10   | 2      | 9      | 1    | 9    | $\leftarrow$ | 9     | 1       | 8       | 1     | 8     | 10 857.9832         | 0.0001                                   | 0.005      |
| 10   | 2      | 9      | 2    | 12   | $\leftarrow$ | 9     | 1       | 8       | 2     | 11    | 10 858.0166         | 0.0001                                   | 0.005      |
| 10   | 2      | 9      | 0    | 10   | $\leftarrow$ | 9     | 1       | 8       | 0     | 9     | 10 858.0166         | -0.0007                                  | 0.005      |
| 10   | 2      | 9      | 1    | 10   | $\leftarrow$ | 9     | 1       | 8       | 1     | 9     | 10 858.0166         | -0.0009                                  | 0.005      |
| 10   | 2      | 9      | 2    | 8    | $\leftarrow$ | 9     | 1       | 8       | 2     | 7     | 10 858.0166         | -0.0015                                  | 0.005      |
| 12   | 0      | 12     | 2    | 12   | $\leftarrow$ | 11    | 1       | 11      | 2     | 11    | 11 145.2931         | -0.0002                                  | 0.002      |
| 12   | 1      | 12     | 2    | 12   | $\leftarrow$ | 11    | 0       | 11      | 2     | 11    | 11 172.3284         | -0.0001                                  | 0.002      |

| $J'$ | $K'_a$ | $K'_c$ | $I'$ | $F'$ | $\leftarrow$ | $J''$ | $K''_a$ | $K''_c$ | $I''$ | $F''$ | $\nu_{\text{obs.}}$ | $\nu_{\text{obs.}} - \nu_{\text{calc.}}$ | exp. error |
|------|--------|--------|------|------|--------------|-------|---------|---------|-------|-------|---------------------|------------------------------------------|------------|
| 9    | 6      | 4      | 2    | 7    | $\leftarrow$ | 9     | 5       | 5       | 2     | 7     | 11 394.5838         | -0.0033                                  | 0.002      |
| 9    | 6      | 4      | 0    | 9    | $\leftarrow$ | 9     | 5       | 5       | 0     | 9     | 11 394.5975         | 0.0002                                   | 0.002      |
| 9    | 6      | 4      | 1    | 9    | $\leftarrow$ | 9     | 5       | 5       | 1     | 9     | 11 394.5975         | -0.0008                                  | 0.002      |
| 9    | 6      | 4      | 2    | 11   | $\leftarrow$ | 9     | 5       | 5       | 2     | 11    | 11 394.6094         | 0.0019                                   | 0.002      |
| 9    | 6      | 4      | 2    | 9    | $\leftarrow$ | 9     | 5       | 5       | 2     | 9     | 11 394.7885         | 0.0001                                   | 0.002      |
| 8    | 6      | 2      | 0    | 8    | $\leftarrow$ | 8     | 5       | 3       | 0     | 8     | 11 414.5720         | 0.0001                                   | 0.002      |
| 4    | 4      | 1      | 2    | 6    | $\leftarrow$ | 3     | 3       | 0       | 2     | 5     | 11 429.9707         | -0.0001                                  | 0.005      |
| 4    | 4      | 1      | 1    | 4    | $\leftarrow$ | 3     | 3       | 0       | 1     | 3     | 11 429.9787         | 0.0013                                   | 0.005      |
| 4    | 4      | 1      | 1    | 3    | $\leftarrow$ | 3     | 3       | 0       | 1     | 2     | 11 430.0062         | 0.0030                                   | 0.005      |
| 4    | 4      | 1      | 2    | 4    | $\leftarrow$ | 3     | 3       | 0       | 2     | 3     | 11 430.0658         | -0.0005                                  | 0.001      |
| 4    | 4      | 0      | 2    | 6    | $\leftarrow$ | 3     | 3       | 1       | 2     | 5     | 11 430.8027         | 0.0007                                   | 0.002      |
| 4    | 4      | 0      | 1    | 4    | $\leftarrow$ | 3     | 3       | 1       | 1     | 3     | 11 430.8103         | 0.0018                                   | 0.002      |
| 4    | 4      | 0      | 1    | 5    | $\leftarrow$ | 3     | 3       | 1       | 1     | 4     | 11 430.8527         | 0.0009                                   | 0.002      |
| 4    | 4      | 0      | 2    | 3    | $\leftarrow$ | 3     | 3       | 1       | 2     | 2     | 11 430.8860         | -0.0038                                  | 0.002      |
| 4    | 4      | 0      | 2    | 4    | $\leftarrow$ | 3     | 3       | 1       | 2     | 3     | 11 430.8979         | -0.0003                                  | 0.002      |
| 11   | 2      | 10     | 2    | 11   | $\leftarrow$ | 10    | 1       | 9       | 2     | 10    | 11 539.0618         | 0.0022                                   | 0.002      |
| 11   | 2      | 10     | 2    | 12   | $\leftarrow$ | 10    | 1       | 9       | 2     | 11    | 11 539.0882         | 0.0012                                   | 0.002      |
| 11   | 2      | 10     | 1    | 10   | $\leftarrow$ | 10    | 1       | 9       | 1     | 9     | 11 539.0882         | 0.0006                                   | 0.002      |
| 11   | 2      | 10     | 2    | 10   | $\leftarrow$ | 10    | 1       | 9       | 2     | 9     | 11 539.0882         | 0.0005                                   | 0.002      |
| 11   | 2      | 10     | 1    | 12   | $\leftarrow$ | 10    | 1       | 9       | 1     | 11    | 11 539.0882         | 0.0004                                   | 0.002      |
| 11   | 2      | 10     | 2    | 13   | $\leftarrow$ | 10    | 1       | 9       | 2     | 12    | 11 539.1152         | 0.0002                                   | 0.002      |
| 11   | 2      | 10     | 0    | 11   | $\leftarrow$ | 10    | 1       | 9       | 0     | 10    | 11 539.1152         | 0.0001                                   | 0.002      |
| 11   | 2      | 10     | 1    | 11   | $\leftarrow$ | 10    | 1       | 9       | 1     | 10    | 11 539.1152         | -0.0001                                  | 0.002      |
| 11   | 2      | 10     | 2    | 9    | $\leftarrow$ | 10    | 1       | 9       | 2     | 8     | 11 539.1152         | -0.0001                                  | 0.002      |
| 6    | 3      | 3      | 2    | 4    | $\leftarrow$ | 5     | 2       | 4       | 2     | 3     | 11 631.1382         | 0.0010                                   | 0.002      |
| 6    | 3      | 3      | 0    | 6    | $\leftarrow$ | 5     | 2       | 4       | 0     | 5     | 11 631.1571         | 0.0004                                   | 0.002      |
| 6    | 3      | 3      | 1    | 6    | $\leftarrow$ | 5     | 2       | 4       | 1     | 5     | 11 631.1571         | -0.0036                                  | 0.002      |
| 6    | 3      | 3      | 2    | 8    | $\leftarrow$ | 5     | 2       | 4       | 2     | 7     | 11 631.1765         | 0.0001                                   | 0.002      |
| 6    | 3      | 3      | 2    | 7    | $\leftarrow$ | 5     | 2       | 4       | 2     | 6     | 11 631.2771         | -0.0002                                  | 0.002      |
| 6    | 3      | 3      | 2    | 6    | $\leftarrow$ | 5     | 2       | 4       | 2     | 5     | 11 631.3436         | 0.0007                                   | 0.002      |
| 13   | 0      | 13     | 2    | 13   | $\leftarrow$ | 12    | 1       | 12      | 2     | 12    | 12 048.5090         | -0.0011                                  | 0.005      |
| 13   | 0      | 13     | 2    | 12   | $\leftarrow$ | 12    | 1       | 12      | 2     | 11    | 12 048.5090         | -0.0012                                  | 0.005      |
| 13   | 0      | 13     | 2    | 15   | $\leftarrow$ | 12    | 1       | 12      | 2     | 14    | 12 048.5179         | -0.0013                                  | 0.005      |
| 12   | 2      | 11     | 2    | 12   | $\leftarrow$ | 11    | 1       | 10      | 2     | 11    | 12 269.6952         | 0.0017                                   | 0.005      |
| 12   | 2      | 11     | 2    | 13   | $\leftarrow$ | 11    | 1       | 10      | 2     | 12    | 12 269.7158         | 0.0003                                   | 0.005      |
| 12   | 2      | 11     | 1    | 11   | $\leftarrow$ | 11    | 1       | 10      | 1     | 10    | 12 269.7158         | 0.0001                                   | 0.005      |
| 12   | 2      | 11     | 1    | 13   | $\leftarrow$ | 11    | 1       | 10      | 1     | 12    | 12 269.7158         | 0.0003                                   | 0.005      |
| 12   | 2      | 11     | 2    | 11   | $\leftarrow$ | 11    | 1       | 10      | 2     | 10    | 12 269.7158         | 0.0009                                   | 0.005      |
| 12   | 2      | 11     | 2    | 14   | $\leftarrow$ | 11    | 1       | 10      | 2     | 13    | 12 269.7371         | -0.0001                                  | 0.005      |
| 12   | 2      | 11     | 0    | 12   | $\leftarrow$ | 11    | 1       | 10      | 0     | 11    | 12 269.7371         | 0.0001                                   | 0.005      |
| 12   | 2      | 11     | 1    | 12   | $\leftarrow$ | 11    | 1       | 10      | 1     | 11    | 12 269.7371         | -0.0001                                  | 0.005      |
| 12   | 2      | 11     | 2    | 10   | $\leftarrow$ | 11    | 1       | 10      | 2     | 9     | 12 269.7371         | 0.0002                                   | 0.005      |
| 5    | 4      | 2      | 2    | 3    | $\leftarrow$ | 4     | 3       | 1       | 2     | 2     | 12 462.6350         | 0.0053                                   | 0.005      |
| 5    | 4      | 2      | 1    | 6    | $\leftarrow$ | 4     | 3       | 1       | 1     | 5     | 12 462.7023         | 0.0033                                   | 0.002      |
| 5    | 4      | 2      | 2    | 6    | $\leftarrow$ | 4     | 3       | 1       | 2     | 5     | 12 462.7132         | 0.0001                                   | 0.005      |
| 5    | 4      | 2      | 2    | 5    | $\leftarrow$ | 4     | 3       | 1       | 2     | 4     | 12 462.7665         | -0.0004                                  | 0.002      |
| 13   | 1      | 12     | 2    | 11   | $\leftarrow$ | 12    | 2       | 11      | 2     | 10    | 12 646.9768         | 0.0025                                   | 0.005      |
| 13   | 1      | 12     | 0    | 13   | $\leftarrow$ | 12    | 2       | 11      | 0     | 12    | 12 646.9768         | 0.0011                                   | 0.005      |
| 13   | 1      | 12     | 1    | 13   | $\leftarrow$ | 12    | 2       | 11      | 1     | 12    | 12 646.9768         | 0.0008                                   | 0.005      |
| 13   | 1      | 12     | 2    | 15   | $\leftarrow$ | 12    | 2       | 11      | 2     | 14    | 12 646.9768         | -0.0003                                  | 0.005      |

| $J'$ | $K'_a$ | $K'_c$ | $I'$ | $F'$ | $\leftarrow$ | $J''$ | $K''_a$ | $K''_c$ | $I''$ | $F''$ | $\nu_{\text{obs.}}$ | $\nu_{\text{obs.}} - \nu_{\text{calc.}}$ | exp. error |
|------|--------|--------|------|------|--------------|-------|---------|---------|-------|-------|---------------------|------------------------------------------|------------|
| 7    | 3      | 4      | 2    | 8    | $\leftarrow$ | 6     | 2       | 5       | 2     | 7     | 12 878.3608         | 0.0007                                   | 0.002      |
| 13   | 2      | 12     | 2    | 13   | $\leftarrow$ | 12    | 1       | 11      | 2     | 12    | 13 047.8113         | -0.0068                                  | 0.005      |
| 13   | 2      | 12     | 2    | 12   | $\leftarrow$ | 12    | 1       | 11      | 2     | 11    | 13 047.8345         | 0.0003                                   | 0.005      |
| 13   | 2      | 12     | 1    | 14   | $\leftarrow$ | 12    | 1       | 11      | 1     | 13    | 13 047.8345         | -0.0005                                  | 0.005      |
| 13   | 2      | 12     | 2    | 14   | $\leftarrow$ | 12    | 1       | 11      | 2     | 13    | 13 047.8345         | -0.0012                                  | 0.005      |
| 13   | 2      | 12     | 1    | 12   | $\leftarrow$ | 12    | 1       | 11      | 1     | 11    | 13 047.8345         | -0.0010                                  | 0.005      |
| 13   | 2      | 12     | 0    | 13   | $\leftarrow$ | 12    | 1       | 11      | 0     | 12    | 13 047.8532         | 0.0012                                   | 0.005      |
| 13   | 2      | 12     | 2    | 11   | $\leftarrow$ | 12    | 1       | 11      | 2     | 10    | 13 047.8532         | 0.0017                                   | 0.005      |
| 13   | 2      | 12     | 2    | 15   | $\leftarrow$ | 12    | 1       | 11      | 2     | 14    | 13 047.8532         | 0.0007                                   | 0.005      |
| 13   | 2      | 12     | 1    | 13   | $\leftarrow$ | 12    | 1       | 11      | 1     | 12    | 13 047.8578         | 0.0057                                   | 0.005      |
| 6    | 4      | 3      | 2    | 4    | $\leftarrow$ | 5     | 3       | 2       | 2     | 3     | 13 485.4292         | 0.0018                                   | 0.005      |
| 6    | 4      | 3      | 1    | 7    | $\leftarrow$ | 5     | 3       | 2       | 1     | 6     | 13 485.5000         | 0.0061                                   | 0.002      |
| 6    | 4      | 3      | 2    | 7    | $\leftarrow$ | 5     | 3       | 2       | 2     | 6     | 13 485.5107         | -0.0002                                  | 0.005      |
| 6    | 4      | 3      | 2    | 6    | $\leftarrow$ | 5     | 3       | 2       | 2     | 5     | 13 485.5571         | -0.0001                                  | 0.002      |
| 6    | 4      | 2      | 0    | 6    | $\leftarrow$ | 5     | 3       | 3       | 0     | 5     | 13 509.0249         | -0.0003                                  | 0.002      |
| 6    | 4      | 2      | 1    | 6    | $\leftarrow$ | 5     | 3       | 3       | 1     | 5     | 13 509.0387         | 0.0116                                   | 0.005      |
| 6    | 4      | 2      | 2    | 5    | $\leftarrow$ | 5     | 3       | 3       | 2     | 4     | 13 509.0737         | 0.0002                                   | 0.002      |
| 6    | 4      | 2      | 1    | 5    | $\leftarrow$ | 5     | 3       | 3       | 1     | 4     | 13 509.0936         | -0.0047                                  | 0.005      |
| 6    | 4      | 2      | 2    | 7    | $\leftarrow$ | 5     | 3       | 3       | 2     | 6     | 13 509.1060         | 0.0002                                   | 0.002      |
| 6    | 4      | 2      | 2    | 6    | $\leftarrow$ | 5     | 3       | 3       | 2     | 5     | 13 509.1559         | 0.0002                                   | 0.002      |
| 8    | 7      | 2      | 1    | 7    | $\leftarrow$ | 8     | 6       | 3       | 1     | 7     | 13 512.4050         | -0.0026                                  | 0.002      |
| 8    | 7      | 1      | 2    | 9    | $\leftarrow$ | 8     | 6       | 2       | 2     | 9     | 13 512.4133         | -0.0005                                  | 0.002      |
| 8    | 7      | 2      | 2    | 9    | $\leftarrow$ | 8     | 6       | 3       | 2     | 9     | 13 512.4215         | 0.0007                                   | 0.002      |
| 8    | 7      | 1      | 2    | 8    | $\leftarrow$ | 8     | 6       | 2       | 2     | 8     | 13 512.5314         | -0.0016                                  | 0.002      |
| 8    | 7      | 2      | 2    | 8    | $\leftarrow$ | 8     | 6       | 3       | 2     | 8     | 13 512.5410         | 0.0010                                   | 0.002      |
| 14   | 1      | 13     | 2    | 14   | $\leftarrow$ | 13    | 2       | 12      | 2     | 13    | 13 618.6712         | -0.0013                                  | 0.002      |
| 14   | 1      | 13     | 2    | 13   | $\leftarrow$ | 13    | 2       | 12      | 2     | 12    | 13 618.6780         | 0.0014                                   | 0.002      |
| 14   | 1      | 13     | 1    | 15   | $\leftarrow$ | 13    | 2       | 12      | 1     | 14    | 13 618.6780         | -0.0001                                  | 0.002      |
| 14   | 1      | 13     | 1    | 13   | $\leftarrow$ | 13    | 2       | 12      | 1     | 12    | 13 618.6780         | -0.0012                                  | 0.002      |
| 14   | 1      | 13     | 2    | 15   | $\leftarrow$ | 13    | 2       | 12      | 2     | 14    | 13 618.6780         | -0.0020                                  | 0.002      |
| 14   | 1      | 13     | 2    | 12   | $\leftarrow$ | 13    | 2       | 12      | 2     | 11    | 13 618.6851         | 0.0020                                   | 0.002      |
| 14   | 1      | 13     | 0    | 14   | $\leftarrow$ | 13    | 2       | 12      | 0     | 13    | 13 618.6851         | 0.0008                                   | 0.002      |
| 14   | 1      | 13     | 1    | 14   | $\leftarrow$ | 13    | 2       | 12      | 1     | 13    | 13 618.6851         | 0.0006                                   | 0.002      |
| 14   | 1      | 13     | 2    | 16   | $\leftarrow$ | 13    | 2       | 12      | 2     | 15    | 13 618.6851         | -0.0003                                  | 0.002      |
| 10   | 3      | 8      | 2    | 8    | $\leftarrow$ | 9     | 2       | 7       | 2     | 7     | 13 811.8180         | -0.0026                                  | 0.002      |
| 14   | 2      | 13     | 2    | 14   | $\leftarrow$ | 13    | 1       | 12      | 2     | 13    | 13 864.7702         | -0.0040                                  | 0.005      |
| 14   | 2      | 13     | 2    | 13   | $\leftarrow$ | 13    | 1       | 12      | 2     | 12    | 13 864.7867         | 0.0003                                   | 0.002      |
| 14   | 2      | 13     | 1    | 15   | $\leftarrow$ | 13    | 1       | 12      | 1     | 14    | 13 864.7867         | -0.0006                                  | 0.002      |
| 14   | 2      | 13     | 1    | 13   | $\leftarrow$ | 13    | 1       | 12      | 1     | 12    | 13 864.7867         | -0.0012                                  | 0.002      |
| 14   | 2      | 13     | 2    | 15   | $\leftarrow$ | 13    | 1       | 12      | 2     | 14    | 13 864.7867         | -0.0016                                  | 0.002      |
| 14   | 2      | 13     | 2    | 12   | $\leftarrow$ | 13    | 1       | 12      | 2     | 11    | 13 864.8023         | 0.0023                                   | 0.002      |
| 14   | 2      | 13     | 0    | 14   | $\leftarrow$ | 13    | 1       | 12      | 0     | 13    | 13 864.8023         | 0.0017                                   | 0.002      |
| 14   | 2      | 13     | 1    | 14   | $\leftarrow$ | 13    | 1       | 12      | 1     | 13    | 13 864.8023         | 0.0015                                   | 0.002      |
| 14   | 2      | 13     | 2    | 16   | $\leftarrow$ | 13    | 1       | 12      | 2     | 15    | 13 864.8023         | 0.0010                                   | 0.002      |
| 11   | 3      | 9      | 2    | 9    | $\leftarrow$ | 10    | 2       | 8       | 2     | 8     | 14 310.4236         | -0.0022                                  | 0.002      |
| 7    | 4      | 4      | 2    | 6    | $\leftarrow$ | 6     | 3       | 3       | 2     | 5     | 14 486.8579         | 0.0006                                   | 0.002      |
| 7    | 4      | 4      | 2    | 8    | $\leftarrow$ | 6     | 3       | 3       | 2     | 7     | 14 486.8821         | 0.0001                                   | 0.002      |
| 7    | 4      | 4      | 2    | 7    | $\leftarrow$ | 6     | 3       | 3       | 2     | 6     | 14 486.9197         | 0.0010                                   | 0.005      |

| $J'$ | $K'_a$ | $K'_c$ | $I'$ | $F'$ | $\leftarrow$ | $J''$ | $K''_a$ | $K''_c$ | $I''$ | $F''$ | $\nu_{\text{obs.}}$ | $\nu_{\text{obs.}} - \nu_{\text{calc.}}$ | exp. error |
|------|--------|--------|------|------|--------------|-------|---------|---------|-------|-------|---------------------|------------------------------------------|------------|
| 5    | 5      | 1      | 2    | 7    | $\leftarrow$ | 4     | 4       | 0       | 2     | 6     | 14 548.2413         | -0.0005                                  | 0.002      |
| 5    | 5      | 1      | 1    | 5    | $\leftarrow$ | 4     | 4       | 0       | 1     | 4     | 14 548.2492         | 0.0008                                   | 0.002      |
| 5    | 5      | 1      | 1    | 6    | $\leftarrow$ | 4     | 4       | 0       | 1     | 5     | 14 548.2840         | 0.0057                                   | 0.002      |
| 5    | 5      | 0      | 2    | 7    | $\leftarrow$ | 4     | 4       | 1       | 2     | 6     | 14 548.2916         | 0.0081                                   | 0.002      |
| 5    | 5      | 0      | 1    | 6    | $\leftarrow$ | 4     | 4       | 1       | 1     | 5     | 14 548.3172         | -0.0027                                  | 0.002      |
| 5    | 5      | 0      | 2    | 4    | $\leftarrow$ | 4     | 4       | 1       | 2     | 3     | 14 548.3421         | -0.0020                                  | 0.002      |
| 5    | 5      | 0      | 2    | 5    | $\leftarrow$ | 4     | 4       | 1       | 2     | 4     | 14 548.3495         | 0.0006                                   | 0.002      |
| 7    | 4      | 3      | 2    | 5    | $\leftarrow$ | 6     | 3       | 4       | 2     | 4     | 14 557.4945         | 0.0033                                   | 0.001      |
| 7    | 4      | 3      | 0    | 7    | $\leftarrow$ | 6     | 3       | 4       | 0     | 6     | 14 557.5002         | -0.0007                                  | 0.002      |
| 7    | 4      | 3      | 1    | 7    | $\leftarrow$ | 6     | 3       | 4       | 1     | 6     | 14 557.5002         | -0.0024                                  | 0.002      |
| 7    | 4      | 3      | 2    | 9    | $\leftarrow$ | 6     | 3       | 4       | 2     | 8     | 14 557.5124         | 0.0015                                   | 0.002      |
| 7    | 4      | 3      | 2    | 6    | $\leftarrow$ | 6     | 3       | 4       | 2     | 5     | 14 557.5449         | 0.0005                                   | 0.002      |
| 7    | 4      | 3      | 1    | 6    | $\leftarrow$ | 6     | 3       | 4       | 1     | 5     | 14 557.5642         | -0.0030                                  | 0.002      |
| 7    | 4      | 3      | 2    | 8    | $\leftarrow$ | 6     | 3       | 4       | 2     | 7     | 14 557.5746         | 0.0007                                   | 0.002      |
| 7    | 4      | 3      | 2    | 7    | $\leftarrow$ | 6     | 3       | 4       | 2     | 6     | 14 557.6184         | -0.0003                                  | 0.001      |
| 15   | 2      | 14     | 2    | 15   | $\leftarrow$ | 14    | 1       | 13      | 2     | 14    | 14 710.2163         | -0.0033                                  | 0.002      |
| 15   | 2      | 14     | 2    | 14   | $\leftarrow$ | 14    | 1       | 13      | 2     | 13    | 14 710.2300         | 0.0010                                   | 0.002      |
| 15   | 2      | 14     | 1    | 16   | $\leftarrow$ | 14    | 1       | 13      | 1     | 15    | 14 710.2300         | -0.0001                                  | 0.002      |
| 15   | 2      | 14     | 1    | 14   | $\leftarrow$ | 14    | 1       | 13      | 1     | 13    | 14 710.2300         | -0.0007                                  | 0.002      |
| 15   | 2      | 14     | 2    | 16   | $\leftarrow$ | 14    | 1       | 13      | 2     | 15    | 14 710.2300         | -0.0011                                  | 0.002      |
| 15   | 2      | 14     | 2    | 13   | $\leftarrow$ | 14    | 1       | 13      | 2     | 12    | 14 710.2437         | 0.0037                                   | 0.002      |
| 15   | 2      | 14     | 0    | 15   | $\leftarrow$ | 14    | 1       | 13      | 0     | 14    | 14 710.2437         | 0.0030                                   | 0.002      |
| 15   | 2      | 14     | 1    | 15   | $\leftarrow$ | 14    | 1       | 13      | 1     | 14    | 14 710.2437         | 0.0029                                   | 0.002      |
| 15   | 2      | 14     | 2    | 17   | $\leftarrow$ | 14    | 1       | 13      | 2     | 16    | 14 710.2437         | 0.0023                                   | 0.002      |
| 16   | 1      | 16     | 2    | 16   | $\leftarrow$ | 15    | 0       | 15      | 2     | 15    | 14 749.0651         | 0.0057                                   | 0.005      |
| 16   | 1      | 16     | 2    | 15   | $\leftarrow$ | 15    | 0       | 15      | 2     | 14    | 14 749.0651         | 0.0054                                   | 0.005      |
| 16   | 1      | 16     | 1    | 15   | $\leftarrow$ | 15    | 0       | 15      | 1     | 14    | 14 749.0651         | 0.0021                                   | 0.005      |
| 16   | 1      | 16     | 2    | 17   | $\leftarrow$ | 15    | 0       | 15      | 2     | 16    | 14 749.0651         | 0.0010                                   | 0.005      |
| 16   | 1      | 16     | 1    | 17   | $\leftarrow$ | 15    | 0       | 15      | 1     | 16    | 14 749.0651         | 0.0036                                   | 0.005      |
| 16   | 1      | 16     | 2    | 14   | $\leftarrow$ | 15    | 0       | 15      | 2     | 13    | 14 749.0651         | 0.0020                                   | 0.005      |
| 16   | 1      | 16     | 0    | 16   | $\leftarrow$ | 15    | 0       | 15      | 0     | 15    | 14 749.0651         | 0.0005                                   | 0.005      |
| 16   | 1      | 16     | 1    | 16   | $\leftarrow$ | 15    | 0       | 15      | 1     | 15    | 14 749.0651         | 0.0004                                   | 0.005      |
| 16   | 1      | 16     | 2    | 18   | $\leftarrow$ | 15    | 0       | 15      | 2     | 17    | 14 749.0651         | -0.0008                                  | 0.005      |
| 12   | 3      | 10     | 2    | 14   | $\leftarrow$ | 11    | 2       | 9       | 2     | 13    | 14 782.2136         | 0.0035                                   | 0.002      |
| 8    | 4      | 5      | 2    | 6    | $\leftarrow$ | 7     | 3       | 4       | 2     | 5     | 15 449.0900         | -0.0022                                  | 0.001      |
| 8    | 4      | 5      | 0    | 8    | $\leftarrow$ | 7     | 3       | 4       | 0     | 7     | 15 449.0983         | 0.0001                                   | 0.002      |
| 8    | 4      | 5      | 1    | 8    | $\leftarrow$ | 7     | 3       | 4       | 1     | 7     | 15 449.0983         | -0.0008                                  | 0.002      |
| 8    | 4      | 5      | 1    | 9    | $\leftarrow$ | 7     | 3       | 4       | 1     | 8     | 15 449.1303         | -0.0005                                  | 0.002      |
| 8    | 4      | 5      | 1    | 7    | $\leftarrow$ | 7     | 3       | 4       | 1     | 6     | 15 449.1367         | 0.0000                                   | 0.002      |
| 8    | 4      | 5      | 2    | 9    | $\leftarrow$ | 7     | 3       | 4       | 2     | 8     | 15 449.1422         | 0.0012                                   | 0.002      |
| 8    | 4      | 5      | 2    | 8    | $\leftarrow$ | 7     | 3       | 4       | 2     | 7     | 15 449.1642         | -0.0024                                  | 0.002      |
| 6    | 5      | 2      | 2    | 6    | $\leftarrow$ | 5     | 4       | 1       | 2     | 5     | 15 584.1038         | -0.0008                                  | 0.002      |
| 6    | 5      | 1      | 2    | 7    | $\leftarrow$ | 5     | 4       | 2       | 2     | 6     | 15 584.4373         | 0.0002                                   | 0.002      |
| 6    | 5      | 1      | 2    | 6    | $\leftarrow$ | 5     | 4       | 2       | 2     | 5     | 15 584.4818         | -0.0002                                  | 0.002      |
| 8    | 4      | 4      | 0    | 8    | $\leftarrow$ | 7     | 3       | 5       | 0     | 7     | 15 623.8881         | -0.0005                                  | 0.005      |
| 8    | 4      | 4      | 1    | 8    | $\leftarrow$ | 7     | 3       | 5       | 1     | 7     | 15 623.8881         | -0.0016                                  | 0.005      |
| 8    | 4      | 4      | 2    | 10   | $\leftarrow$ | 7     | 3       | 5       | 2     | 9     | 15 623.8997         | 0.0020                                   | 0.005      |
| 8    | 4      | 4      | 2    | 7    | $\leftarrow$ | 7     | 3       | 5       | 2     | 6     | 15 623.9276         | -0.0015                                  | 0.002      |
| 8    | 4      | 4      | 1    | 7    | $\leftarrow$ | 7     | 3       | 5       | 1     | 6     | 15 623.9404         | -0.0072                                  | 0.005      |
| 8    | 4      | 4      | 2    | 9    | $\leftarrow$ | 7     | 3       | 5       | 2     | 8     | 15 623.9486         | -0.0061                                  | 0.004      |
| 8    | 4      | 4      | 2    | 8    | $\leftarrow$ | 7     | 3       | 5       | 2     | 7     | 15 623.9972         | 0.0018                                   | 0.002      |

| $J'$ | $K'_a$ | $K'_c$ | $I'$ | $F'$ | $\leftarrow$ | $J''$ | $K''_a$ | $K''_c$ | $I''$ | $F''$ | $\nu_{\text{obs.}}$ | $\nu_{\text{obs.}} - \nu_{\text{calc.}}$ | exp. error |
|------|--------|--------|------|------|--------------|-------|---------|---------|-------|-------|---------------------|------------------------------------------|------------|
| 17   | 1      | 16     | 2    | 17   | $\leftarrow$ | 16    | 2       | 15      | 2     | 16    | 16 402.0520         | -0.0006                                  | 0.005      |
| 17   | 1      | 16     | 1    | 16   | $\leftarrow$ | 16    | 2       | 15      | 1     | 15    | 16 402.0584         | -0.0006                                  | 0.005      |
| 17   | 1      | 16     | 2    | 18   | $\leftarrow$ | 16    | 2       | 15      | 2     | 17    | 16 402.0584         | -0.0012                                  | 0.005      |
| 17   | 1      | 16     | 2    | 16   | $\leftarrow$ | 16    | 2       | 15      | 2     | 15    | 16 402.0584         | 0.0012                                   | 0.005      |
| 17   | 1      | 16     | 1    | 18   | $\leftarrow$ | 16    | 2       | 15      | 1     | 17    | 16 402.0584         | 0.0001                                   | 0.005      |
| 17   | 1      | 16     | 2    | 15   | $\leftarrow$ | 16    | 2       | 15      | 2     | 14    | 16 402.0648         | 0.0013                                   | 0.005      |
| 17   | 1      | 16     | 0    | 17   | $\leftarrow$ | 16    | 2       | 15      | 0     | 16    | 16 402.0648         | 0.0004                                   | 0.005      |
| 17   | 1      | 16     | 1    | 17   | $\leftarrow$ | 16    | 2       | 15      | 1     | 16    | 16 402.0648         | 0.0003                                   | 0.005      |
| 17   | 1      | 16     | 2    | 19   | $\leftarrow$ | 16    | 2       | 15      | 2     | 18    | 16 402.0648         | -0.0003                                  | 0.005      |
| 18   | 0      | 18     | 2    | 18   | $\leftarrow$ | 17    | 1       | 17      | 2     | 17    | 16 542.3129         | 0.0010                                   | 0.005      |
| 18   | 0      | 18     | 2    | 17   | $\leftarrow$ | 17    | 1       | 17      | 2     | 16    | 16 542.3129         | 0.0008                                   | 0.005      |
| 18   | 0      | 18     | 1    | 17   | $\leftarrow$ | 17    | 1       | 17      | 1     | 16    | 16 542.3129         | -0.0017                                  | 0.005      |
| 18   | 0      | 18     | 2    | 19   | $\leftarrow$ | 17    | 1       | 17      | 2     | 18    | 16 542.3129         | -0.0026                                  | 0.005      |
| 18   | 0      | 18     | 1    | 19   | $\leftarrow$ | 17    | 1       | 17      | 1     | 18    | 16 542.3129         | -0.0005                                  | 0.005      |
| 18   | 0      | 18     | 2    | 16   | $\leftarrow$ | 17    | 1       | 17      | 2     | 15    | 16 542.3129         | -0.0017                                  | 0.005      |
| 18   | 0      | 18     | 0    | 18   | $\leftarrow$ | 17    | 1       | 17      | 0     | 17    | 16 542.3129         | -0.0029                                  | 0.005      |
| 18   | 0      | 18     | 1    | 18   | $\leftarrow$ | 17    | 1       | 17      | 1     | 17    | 16 542.3129         | -0.0030                                  | 0.005      |
| 18   | 0      | 18     | 2    | 20   | $\leftarrow$ | 17    | 1       | 17      | 2     | 19    | 16 542.3129         | -0.0041                                  | 0.005      |
| 18   | 1      | 18     | 2    | 18   | $\leftarrow$ | 17    | 0       | 17      | 2     | 17    | 16 542.9855         | 0.0052                                   | 0.005      |
| 18   | 1      | 18     | 2    | 17   | $\leftarrow$ | 17    | 0       | 17      | 2     | 16    | 16 542.9855         | 0.0051                                   | 0.005      |
| 18   | 1      | 18     | 1    | 17   | $\leftarrow$ | 17    | 0       | 17      | 1     | 16    | 16 542.9855         | 0.0024                                   | 0.005      |
| 18   | 1      | 18     | 2    | 19   | $\leftarrow$ | 17    | 0       | 17      | 2     | 18    | 16 542.9855         | 0.0015                                   | 0.005      |
| 18   | 1      | 18     | 1    | 19   | $\leftarrow$ | 17    | 0       | 17      | 1     | 18    | 16 542.9855         | 0.0036                                   | 0.005      |
| 18   | 1      | 18     | 2    | 16   | $\leftarrow$ | 17    | 0       | 17      | 2     | 15    | 16 542.9855         | 0.0024                                   | 0.005      |
| 18   | 1      | 18     | 0    | 18   | $\leftarrow$ | 17    | 0       | 17      | 0     | 17    | 16 542.9855         | 0.0012                                   | 0.005      |
| 18   | 1      | 18     | 1    | 18   | $\leftarrow$ | 17    | 0       | 17      | 1     | 17    | 16 542.9855         | 0.0011                                   | 0.005      |
| 18   | 1      | 18     | 2    | 20   | $\leftarrow$ | 17    | 0       | 17      | 2     | 19    | 16 542.9855         | 0.0000                                   | 0.005      |
| 7    | 5      | 3      | 2    | 5    | $\leftarrow$ | 6     | 4       | 2       | 2     | 4     | 16 617.4494         | -0.0019                                  | 0.002      |
| 7    | 5      | 3      | 0    | 7    | $\leftarrow$ | 6     | 4       | 2       | 0     | 6     | 16 617.4572         | -0.0001                                  | 0.002      |
| 7    | 5      | 3      | 1    | 7    | $\leftarrow$ | 6     | 4       | 2       | 1     | 6     | 16 617.4572         | -0.0007                                  | 0.002      |
| 7    | 5      | 3      | 2    | 9    | $\leftarrow$ | 6     | 4       | 2       | 2     | 8     | 16 617.4650         | 0.0016                                   | 0.002      |
| 7    | 5      | 3      | 2    | 6    | $\leftarrow$ | 6     | 4       | 2       | 2     | 5     | 16 617.4975         | -0.0019                                  | 0.002      |
| 7    | 5      | 3      | 1    | 8    | $\leftarrow$ | 6     | 4       | 2       | 1     | 7     | 16 617.5067         | -0.0003                                  | 0.002      |
| 7    | 5      | 3      | 1    | 6    | $\leftarrow$ | 6     | 4       | 2       | 1     | 5     | 16 617.5122         | -0.0007                                  | 0.002      |
| 7    | 5      | 3      | 2    | 8    | $\leftarrow$ | 6     | 4       | 2       | 2     | 7     | 16 617.5192         | 0.0018                                   | 0.002      |
| 7    | 5      | 3      | 2    | 7    | $\leftarrow$ | 6     | 4       | 2       | 2     | 6     | 16 617.5595         | -0.0007                                  | 0.002      |
| 7    | 5      | 2      | 2    | 5    | $\leftarrow$ | 6     | 4       | 3       | 2     | 4     | 16 619.3431         | -0.0029                                  | 0.002      |
| 7    | 5      | 2      | 0    | 7    | $\leftarrow$ | 6     | 4       | 3       | 0     | 6     | 16 619.3518         | -0.0005                                  | 0.002      |
| 7    | 5      | 2      | 1    | 7    | $\leftarrow$ | 6     | 4       | 3       | 1     | 6     | 16 619.3518         | -0.0009                                  | 0.002      |
| 7    | 5      | 2      | 2    | 9    | $\leftarrow$ | 6     | 4       | 3       | 2     | 8     | 16 619.3600         | 0.0015                                   | 0.002      |
| 7    | 5      | 2      | 2    | 6    | $\leftarrow$ | 6     | 4       | 3       | 2     | 5     | 16 619.3921         | -0.0023                                  | 0.002      |
| 7    | 5      | 2      | 1    | 8    | $\leftarrow$ | 6     | 4       | 3       | 1     | 7     | 16 619.4031         | 0.0002                                   | 0.002      |
| 7    | 5      | 2      | 1    | 6    | $\leftarrow$ | 6     | 4       | 3       | 1     | 5     | 16 619.4085         | -0.0002                                  | 0.002      |
| 7    | 5      | 2      | 2    | 8    | $\leftarrow$ | 6     | 4       | 3       | 2     | 7     | 16 619.4150         | 0.0020                                   | 0.002      |
| 7    | 5      | 2      | 2    | 7    | $\leftarrow$ | 6     | 4       | 3       | 2     | 6     | 16 619.4562         | 0.0001                                   | 0.002      |
| 9    | 4      | 5      | 2    | 10   | $\leftarrow$ | 8     | 3       | 6       | 2     | 9     | 16 724.6097         | 0.0024                                   | 0.002      |
| 9    | 4      | 5      | 2    | 9    | $\leftarrow$ | 8     | 3       | 6       | 2     | 8     | 16 724.6481         | 0.0005                                   | 0.002      |
| 6    | 6      | 1      | 2    | 8    | $\leftarrow$ | 5     | 5       | 0       | 2     | 7     | 17 666.0686         | -0.0007                                  | 0.002      |

| $J'$ | $K'_a$ | $K'_c$ | $I'$ | $F'$ | $\leftarrow$ | $J''$ | $K''_a$ | $K''_c$ | $I''$ | $F''$ | $\nu_{\text{obs.}}$ | $\nu_{\text{obs.}} - \nu_{\text{calc.}}$ | exp. error |
|------|--------|--------|------|------|--------------|-------|---------|---------|-------|-------|---------------------|------------------------------------------|------------|
| 7    | 6      | 2      | 1    | 7    | $\leftarrow$ | 6     | 5       | 1       | 1     | 6     | 18 702.2867         | 0.0008                                   | 0.002      |
| 7    | 6      | 2      | 2    | 5    | $\leftarrow$ | 6     | 5       | 1       | 2     | 4     | 18 702.2867         | 0.0005                                   | 0.002      |
| 7    | 6      | 2      | 0    | 7    | $\leftarrow$ | 6     | 5       | 1       | 0     | 6     | 18 702.2867         | 0.0001                                   | 0.002      |
| 7    | 6      | 2      | 2    | 9    | $\leftarrow$ | 6     | 5       | 1       | 2     | 8     | 18 702.2867         | -0.0002                                  | 0.002      |
| 7    | 6      | 1      | 1    | 7    | $\leftarrow$ | 6     | 5       | 2       | 1     | 6     | 18 702.3092         | 0.0024                                   | 0.002      |
| 7    | 6      | 1      | 2    | 5    | $\leftarrow$ | 6     | 5       | 2       | 2     | 4     | 18 702.3092         | 0.0021                                   | 0.002      |
| 7    | 6      | 1      | 0    | 7    | $\leftarrow$ | 6     | 5       | 2       | 0     | 6     | 18 702.3092         | 0.0017                                   | 0.002      |
| 7    | 6      | 1      | 2    | 9    | $\leftarrow$ | 6     | 5       | 2       | 2     | 8     | 18 702.3092         | 0.0013                                   | 0.002      |
| 7    | 6      | 1      | 2    | 7    | $\leftarrow$ | 6     | 5       | 2       | 2     | 6     | 18 702.3840         | 0.0006                                   | 0.002      |

Table S3: Observed minus calculated table for the analysis reported in Section 4.1 for 2,4-DNT. Transitions are assigned with the rotational quantum numbers  $J_{K_a K_c}$  and the torsional symmetry species  $S$  of the upper and lower levels. For transitions with resolved hyperfine splittings, the total angular momentum  $F$  and the total nuclear spin angular momentum  $I$  are given. Columns headed obs,  $\nu_{\text{obs.}} - \nu_{\text{calc.}}$  and exp. error list observed frequencies, observed minus calculated residuals, and uncertainties in MHz, respectively.

| $J'$ | $K'_a$ | $K'_c$ | $S$ | $I'$ | $F'$ | $\leftarrow$ | $J''$ | $K''_a$ | $K''_c$ | $S$ | $I''$ | $F''$ | $\nu_{\text{obs.}}$ | $\nu_{\text{obs.}} - \nu_{\text{calc.}}$ | exp. error |
|------|--------|--------|-----|------|------|--------------|-------|---------|---------|-----|-------|-------|---------------------|------------------------------------------|------------|
| 2    | 2      | 1      | A2  | 2    | 4    | $\leftarrow$ | 2     | 1       | 2       | A1  | 2     | 4     | 3235.8047           | -0.0093                                  | 0.0020     |
| 2    | 2      | 1      | A2  | 1    | 3    | $\leftarrow$ | 2     | 1       | 2       | A1  | 1     | 3     | 3236.0600           | -0.0260                                  | 0.1000     |
| 5    | 1      | 5      | A2  | 2    | 5    | $\leftarrow$ | 4     | 0       | 4       | A1  | 2     | 4     | 4871.6228           | -0.0046                                  | 0.0050     |
| 5    | 1      | 5      | A2  | 1    | 4    | $\leftarrow$ | 4     | 0       | 4       | A1  | 1     | 3     | 4871.7010           | 0.0081                                   | 0.0020     |
| 5    | 1      | 5      | A2  | 1    | 6    | $\leftarrow$ | 4     | 0       | 4       | A1  | 1     | 5     | 4871.7010           | 0.0023                                   | 0.0020     |
| 5    | 1      | 5      | A2  | 1    | 5    | $\leftarrow$ | 4     | 0       | 4       | A1  | 1     | 4     | 4871.7626           | 0.0074                                   | 0.0020     |
| 3    | 2      | 1      | A2  | 2    | 5    | $\leftarrow$ | 2     | 1       | 2       | A1  | 2     | 4     | 6182.3274           | -0.0028                                  | 0.0010     |
| 3    | 2      | 1      | A2  | 1    | 4    | $\leftarrow$ | 2     | 1       | 2       | A1  | 1     | 3     | 6182.4987           | -0.0009                                  | 0.0010     |
| 7    | 1      | 7      | A2  | 2    | 7    | $\leftarrow$ | 6     | 0       | 6       | A1  | 2     | 6     | 6293.7429           | 0.0005                                   | 0.0020     |
| 7    | 1      | 7      | A2  | 2    | 9    | $\leftarrow$ | 6     | 0       | 6       | A1  | 2     | 8     | 6293.8170           | 0.0022                                   | 0.0020     |
| 8    | 4      | 4      | A1  | 2    | 8    | $\leftarrow$ | 8     | 3       | 5       | A2  | 2     | 8     | 6683.1789           | 0.0049                                   | 0.0050     |
| 8    | 0      | 8      | A1  | 2    | 7    | $\leftarrow$ | 7     | 1       | 7       | A2  | 2     | 6     | 6838.8531           | -0.0010                                  | 0.0050     |
| 8    | 0      | 8      | A1  | 2    | 6    | $\leftarrow$ | 7     | 1       | 7       | A2  | 2     | 5     | 6838.8587           | -0.0008                                  | 0.0050     |
| 8    | 0      | 8      | A1  | 2    | 8    | $\leftarrow$ | 7     | 1       | 7       | A2  | 2     | 7     | 6838.8587           | -0.0005                                  | 0.0050     |
| 8    | 0      | 8      | A1  | 0    | 8    | $\leftarrow$ | 7     | 1       | 7       | A2  | 0     | 7     | 6838.8668           | -0.0006                                  | 0.0050     |
| 8    | 0      | 8      | A1  | 1    | 7    | $\leftarrow$ | 7     | 1       | 7       | A2  | 1     | 6     | 6838.8668           | 0.0007                                   | 0.0050     |
| 8    | 0      | 8      | A1  | 1    | 9    | $\leftarrow$ | 7     | 1       | 7       | A2  | 1     | 8     | 6838.8668           | 0.0035                                   | 0.0050     |
| 8    | 0      | 8      | A1  | 1    | 8    | $\leftarrow$ | 7     | 1       | 7       | A2  | 1     | 7     | 6838.8668           | 0.0014                                   | 0.0050     |
| 8    | 0      | 8      | A1  | 2    | 9    | $\leftarrow$ | 7     | 1       | 7       | A2  | 2     | 8     | 6838.8739           | 0.0047                                   | 0.0050     |
| 8    | 0      | 8      | A1  | 2    | 10   | $\leftarrow$ | 7     | 1       | 7       | A2  | 2     | 9     | 6838.8739           | 0.0022                                   | 0.0050     |
| 5    | 4      | 1      | A2  |      |      | $\leftarrow$ | 5     | 3       | 2       | A1  |       |       | 7004.3910           | -0.0010                                  | 0.0100     |
| 5    | 4      | 1      | E   |      |      | $\leftarrow$ | 5     | 3       | 2       | E   |       |       | 7004.7260           | 0.0160                                   | 0.0100     |
| 7    | 2      | 5      | A2  | 1    | 6    | $\leftarrow$ | 6     | 2       | 4       | A1  | 1     | 5     | 7137.5173           | -0.0042                                  | 0.0020     |
| 7    | 2      | 5      | A2  | 2    | 8    | $\leftarrow$ | 6     | 2       | 4       | A1  | 2     | 7     | 7137.5173           | -0.0042                                  | 0.0020     |
| 7    | 2      | 5      | A2  | 2    | 5    | $\leftarrow$ | 6     | 2       | 4       | A1  | 2     | 4     | 7137.5246           | -0.0019                                  | 0.0020     |
| 7    | 2      | 5      | A2  | 2    | 6    | $\leftarrow$ | 6     | 2       | 4       | A1  | 2     | 5     | 7137.5246           | 0.0041                                   | 0.0020     |
| 7    | 2      | 5      | A2  | 0    | 7    | $\leftarrow$ | 6     | 2       | 4       | A1  | 0     | 6     | 7137.5246           | -0.0025                                  | 0.0020     |
| 7    | 2      | 5      | A2  | 1    | 7    | $\leftarrow$ | 6     | 2       | 4       | A1  | 1     | 6     | 7137.5246           | -0.0023                                  | 0.0020     |
| 7    | 2      | 5      | A2  | 1    | 8    | $\leftarrow$ | 6     | 2       | 4       | A1  | 1     | 7     | 7137.5246           | 0.0032                                   | 0.0020     |
| 7    | 2      | 5      | A2  | 2    | 9    | $\leftarrow$ | 6     | 2       | 4       | A1  | 2     | 8     | 7137.5246           | -0.0027                                  | 0.0020     |
| 9    | 0      | 9      | A2  | 2    | 8    | $\leftarrow$ | 8     | 1       | 8       | A1  | 2     | 7     | 7700.3406           | -0.0003                                  | 0.0020     |
| 9    | 0      | 9      | A2  | 1    | 10   | $\leftarrow$ | 8     | 1       | 8       | A1  | 1     | 9     | 7700.3487           | 0.0011                                   | 0.0020     |
| 9    | 0      | 9      | A2  | 2    | 10   | $\leftarrow$ | 8     | 1       | 8       | A1  | 2     | 9     | 7700.3534           | 0.0019                                   | 0.0020     |
| 9    | 0      | 9      | A2  | 2    | 11   | $\leftarrow$ | 8     | 1       | 8       | A1  | 2     | 10    | 7700.3588           | 0.0023                                   | 0.0020     |
| 6    | 2      | 5      | A2  | 2    | 8    | $\leftarrow$ | 5     | 1       | 4       | A1  | 2     | 7     | 7736.6670           | -0.0041                                  | 0.0010     |
| 6    | 2      | 5      | A2  | 0    | 6    | $\leftarrow$ | 5     | 1       | 4       | A1  | 0     | 5     | 7736.6757           | -0.0038                                  | 0.0010     |
| 6    | 2      | 5      | A2  | 1    | 6    | $\leftarrow$ | 5     | 1       | 4       | A1  | 1     | 5     | 7736.6867           | 0.0042                                   | 0.0010     |
| 6    | 2      | 5      | A2  | 2    | 4    | $\leftarrow$ | 5     | 1       | 4       | A1  | 2     | 3     | 7736.6931           | 0.0012                                   | 0.0010     |
| 3    | 3      | 0      | A1  | 2    | 3    | $\leftarrow$ | 2     | 2       | 1       | A2  | 2     | 2     | 7929.0556           | -0.0123                                  | 0.0020     |



| $J'$ | $K'_a$ | $K'_c$ | $S$ | $I'$ | $F'$ | $\leftarrow$ | $J''$ | $K''_a$ | $K''_c$ | $S$ | $I''$ | $F''$ | $\nu_{\text{obs.}}$ | $\nu_{\text{obs.}} - \nu_{\text{calc.}}$ | exp. error |
|------|--------|--------|-----|------|------|--------------|-------|---------|---------|-----|-------|-------|---------------------|------------------------------------------|------------|
| 10   | 2      | 9      | A2  | 2    | 10   | $\leftarrow$ | 9     | 2       | 8       | A1  | 2     | 9     | 9248.9131           | 0.0010                                   | 0.0020     |
| 10   | 2      | 9      | A2  | 2    | 9    | $\leftarrow$ | 9     | 2       | 8       | A1  | 2     | 8     | 9248.9300           | 0.0007                                   | 0.0050     |
| 10   | 2      | 9      | A2  | 1    | 11   | $\leftarrow$ | 9     | 2       | 8       | A1  | 1     | 10    | 9248.9300           | -0.0009                                  | 0.0050     |
| 10   | 2      | 9      | A2  | 1    | 10   | $\leftarrow$ | 9     | 2       | 8       | A1  | 1     | 9     | 9248.9456           | -0.0007                                  | 0.0050     |
| 10   | 2      | 9      | A2  | 2    | 8    | $\leftarrow$ | 9     | 2       | 8       | A1  | 2     | 7     | 9248.9456           | 0.0002                                   | 0.0050     |
| 10   | 2      | 9      | A2  | 2    | 12   | $\leftarrow$ | 9     | 2       | 8       | A1  | 2     | 11    | 9248.9456           | -0.0017                                  | 0.0050     |
| 10   | 2      | 9      | A2  | 0    | 10   | $\leftarrow$ | 9     | 2       | 8       | A1  | 0     | 9     | 9248.9456           | -0.0010                                  | 0.0050     |
| 9    | 2      | 8      | A1  | 2    | 9    | $\leftarrow$ | 8     | 1       | 7       | A2  | 2     | 8     | 9399.8607           | -0.0009                                  | 0.0050     |
| 9    | 2      | 8      | A1  | 1    | 8    | $\leftarrow$ | 8     | 1       | 7       | A2  | 2     | 7     | 9399.8689           | 0.0040                                   | 0.0020     |
| 5    | 3      | 2      | A1  | 2    | 3    | $\leftarrow$ | 4     | 2       | 3       | A2  | 2     | 2     | 9948.6875           | 0.0023                                   | 0.0020     |
| 5    | 3      | 2      | A1  | 0    | 5    | $\leftarrow$ | 4     | 2       | 3       | A2  | 0     | 4     | 9948.7029           | -0.0115                                  | 0.0020     |
| 5    | 3      | 2      | A1  | 2    | 5    | $\leftarrow$ | 4     | 2       | 3       | A2  | 2     | 4     | 9948.9115           | 0.0038                                   | 0.0020     |
| 12   | 0      | 12     | A1  | 2    | 12   | $\leftarrow$ | 11    | 1       | 11      | A2  | 2     | 11    | 10 204.5764         | -0.0028                                  | 0.0020     |
| 6    | 2      | 4      | E   | 2    | 4    | $\leftarrow$ | 5     | 1       | 5       | E   | 2     | 3     | 10 654.4786         | 0.0009                                   | 0.0010     |
| 6    | 2      | 4      | A1  | 2    | 4    | $\leftarrow$ | 5     | 1       | 5       | A2  | 2     | 3     | 10 654.4884         | 0.0022                                   | 0.0010     |
| 6    | 2      | 4      | E   |      |      | $\leftarrow$ | 5     | 1       | 5       | E   |       |       | 10 654.7650         | 0.0080                                   | 0.0020     |
| 6    | 2      | 4      | E   | 2    | 6    | $\leftarrow$ | 5     | 1       | 5       | E   | 2     | 5     | 10 655.1633         | 0.0009                                   | 0.0010     |
| 6    | 2      | 4      | A1  | 2    | 6    | $\leftarrow$ | 5     | 1       | 5       | A2  | 2     | 5     | 10 655.1736         | 0.0026                                   | 0.0010     |
| 11   | 4      | 8      | A1  | 2    | 11   | $\leftarrow$ | 10    | 4       | 7       | A2  | 2     | 10    | 10 723.8987         | -0.0071                                  | 0.0020     |
| 11   | 4      | 8      | A1  | 1    | 12   | $\leftarrow$ | 10    | 4       | 7       | A2  | 1     | 11    | 10 723.9133         | -0.0082                                  | 0.0050     |
| 11   | 4      | 8      | A1  | 2    | 10   | $\leftarrow$ | 10    | 4       | 7       | A2  | 2     | 9     | 10 723.9133         | -0.0086                                  | 0.0050     |
| 11   | 4      | 8      | A1  | 2    | 12   | $\leftarrow$ | 10    | 4       | 7       | A2  | 2     | 11    | 10 723.9187         | -0.0002                                  | 0.0020     |
| 11   | 4      | 8      | A1  | 1    | 10   | $\leftarrow$ | 10    | 4       | 7       | A2  | 1     | 9     | 10 723.9192         | -0.0002                                  | 0.0020     |
| 11   | 4      | 8      | A1  | 2    | 13   | $\leftarrow$ | 10    | 4       | 7       | A2  | 2     | 12    | 10 723.9289         | -0.0057                                  | 0.0050     |
| 11   | 4      | 8      | A1  | 0    | 11   | $\leftarrow$ | 10    | 4       | 7       | A2  | 0     | 10    | 10 723.9289         | -0.0061                                  | 0.0050     |
| 11   | 4      | 8      | A1  | 1    | 11   | $\leftarrow$ | 10    | 4       | 7       | A2  | 1     | 10    | 10 723.9289         | -0.0062                                  | 0.0050     |
| 11   | 4      | 8      | A1  | 2    | 9    | $\leftarrow$ | 10    | 4       | 7       | A2  | 2     | 8     | 10 723.9289         | -0.0066                                  | 0.0050     |
| 4    | 4      | 1      | A2  | 2    | 6    | $\leftarrow$ | 3     | 3       | 0       | A1  | 2     | 5     | 10 897.1957         | 0.0010                                   | 0.0020     |
| 4    | 4      | 0      | A1  | 2    | 6    | $\leftarrow$ | 3     | 3       | 1       | A2  | 2     | 5     | 10 898.1865         | 0.0014                                   | 0.0050     |
| 4    | 4      | 0      | A1  | 1    | 3    | $\leftarrow$ | 3     | 3       | 1       | A2  | 1     | 2     | 10 898.2149         | 0.0002                                   | 0.0050     |
| 4    | 4      | 0      | A1  | 2    | 2    | $\leftarrow$ | 3     | 3       | 1       | A2  | 2     | 1     | 10 898.2149         | 0.0000                                   | 0.0050     |
| 4    | 4      | 0      | A1  | 2    | 5    | $\leftarrow$ | 3     | 3       | 1       | A2  | 2     | 4     | 10 898.2149         | -0.0031                                  | 0.0050     |
| 4    | 4      | 0      | A1  | 2    | 4    | $\leftarrow$ | 3     | 3       | 1       | A2  | 2     | 3     | 10 898.2673         | 0.0006                                   | 0.0050     |
| 13   | 0      | 13     | A2  | 2    | 13   | $\leftarrow$ | 12    | 1       | 12      | A1  | 2     | 12    | 11 027.7449         | 0.0007                                   | 0.0050     |
| 13   | 0      | 13     | A2  | 2    | 12   | $\leftarrow$ | 12    | 1       | 12      | A1  | 2     | 11    | 11 027.7449         | -0.0020                                  | 0.0050     |
| 13   | 0      | 13     | A2  | 1    | 12   | $\leftarrow$ | 12    | 1       | 12      | A1  | 1     | 11    | 11 027.7532         | 0.0039                                   | 0.0050     |
| 13   | 0      | 13     | A2  | 2    | 14   | $\leftarrow$ | 12    | 1       | 12      | A1  | 2     | 13    | 11 027.7532         | 0.0023                                   | 0.0050     |
| 13   | 0      | 13     | A2  | 2    | 11   | $\leftarrow$ | 12    | 1       | 12      | A1  | 2     | 10    | 11 027.7532         | 0.0015                                   | 0.0050     |
| 13   | 0      | 13     | A2  | 1    | 14   | $\leftarrow$ | 12    | 1       | 12      | A1  | 1     | 13    | 11 027.7532         | 0.0033                                   | 0.0050     |

| $J'$ | $K'_a$ | $K'_c$ | $S$ | $I'$ | $F'$ | $\leftarrow$ | $J''$ | $K''_a$ | $K''_c$ | $S$ | $I''$ | $F''$ | $\nu_{\text{obs.}}$ | $\nu_{\text{obs.}} - \nu_{\text{calc.}}$ | exp. error |
|------|--------|--------|-----|------|------|--------------|-------|---------|---------|-----|-------|-------|---------------------|------------------------------------------|------------|
| 13   | 0      | 13     | A2  | 0    | 13   | $\leftarrow$ | 12    | 1       | 12      | A1  | 0     | 12    | 11 027.7568         | 0.0024                                   | 0.0050     |
| 13   | 0      | 13     | A2  | 1    | 13   | $\leftarrow$ | 12    | 1       | 12      | A1  | 1     | 12    | 11 027.7568         | 0.0029                                   | 0.0050     |
| 13   | 0      | 13     | A2  | 2    | 15   | $\leftarrow$ | 12    | 1       | 12      | A1  | 2     | 14    | 11 027.7568         | 0.0006                                   | 0.0050     |
| 7    | 3      | 5      | A2  | 2    | 5    | $\leftarrow$ | 6     | 2       | 4       | A1  | 2     | 4     | 11 212.2672         | 0.0037                                   | 0.0020     |
| 13   | 1      | 12     | A1  | 2    | 13   | $\leftarrow$ | 12    | 2       | 11      | A2  | 2     | 12    | 11 669.4783         | -0.0041                                  | 0.0020     |
| 13   | 1      | 12     | A1  | 1    | 12   | $\leftarrow$ | 12    | 2       | 11      | A2  | 1     | 11    | 11 669.4847         | -0.0039                                  | 0.0050     |
| 13   | 1      | 12     | A1  | 2    | 14   | $\leftarrow$ | 12    | 2       | 11      | A2  | 2     | 13    | 11 669.4847         | -0.0048                                  | 0.0050     |
| 13   | 1      | 12     | A1  | 2    | 12   | $\leftarrow$ | 12    | 2       | 11      | A2  | 2     | 11    | 11 669.4847         | -0.0029                                  | 0.0050     |
| 13   | 1      | 12     | A1  | 1    | 14   | $\leftarrow$ | 12    | 2       | 11      | A2  | 1     | 13    | 11 669.4847         | -0.0047                                  | 0.0050     |
| 13   | 1      | 12     | A1  | 2    | 11   | $\leftarrow$ | 12    | 2       | 11      | A2  | 2     | 10    | 11 669.4928         | -0.0008                                  | 0.0050     |
| 13   | 1      | 12     | A1  | 0    | 13   | $\leftarrow$ | 12    | 2       | 11      | A2  | 0     | 12    | 11 669.4928         | -0.0024                                  | 0.0020     |
| 13   | 1      | 12     | A1  | 1    | 13   | $\leftarrow$ | 12    | 2       | 11      | A2  | 1     | 12    | 11 669.4928         | -0.0020                                  | 0.0020     |
| 13   | 1      | 12     | A1  | 2    | 15   | $\leftarrow$ | 12    | 2       | 11      | A2  | 2     | 14    | 11 669.4928         | -0.0034                                  | 0.0020     |
| 12   | 5      | 8      | A1  | 2    | 12   | $\leftarrow$ | 11    | 5       | 7       | A2  | 2     | 11    | 11 696.2420         | 0.0076                                   | 0.0050     |
| 12   | 5      | 8      | A1  | 2    | 13   | $\leftarrow$ | 11    | 5       | 7       | A2  | 2     | 12    | 11 696.2420         | -0.0066                                  | 0.0050     |
| 12   | 5      | 8      | A1  | 1    | 11   | $\leftarrow$ | 11    | 5       | 7       | A2  | 1     | 10    | 11 696.2420         | -0.0073                                  | 0.0050     |
| 12   | 5      | 8      | A1  | 1    | 13   | $\leftarrow$ | 11    | 5       | 7       | A2  | 1     | 12    | 11 696.2571         | 0.0053                                   | 0.0050     |
| 12   | 5      | 8      | A1  | 2    | 11   | $\leftarrow$ | 11    | 5       | 7       | A2  | 2     | 10    | 11 696.2571         | 0.0044                                   | 0.0050     |
| 12   | 5      | 8      | A1  | 2    | 14   | $\leftarrow$ | 11    | 5       | 7       | A2  | 2     | 13    | 11 696.2713         | 0.0053                                   | 0.0050     |
| 12   | 5      | 8      | A1  | 0    | 12   | $\leftarrow$ | 11    | 5       | 7       | A2  | 0     | 11    | 11 696.2713         | 0.0046                                   | 0.0050     |
| 12   | 5      | 8      | A1  | 1    | 12   | $\leftarrow$ | 11    | 5       | 7       | A2  | 1     | 11    | 11 696.2713         | 0.0044                                   | 0.0050     |
| 12   | 5      | 8      | A1  | 2    | 10   | $\leftarrow$ | 11    | 5       | 7       | A2  | 2     | 9     | 11 696.2713         | 0.0037                                   | 0.0050     |
| 8    | 3      | 6      | A1  | 2    | 8    | $\leftarrow$ | 7     | 2       | 5       | A2  | 2     | 7     | 11 819.3374         | -0.0056                                  | 0.0050     |
| 14   | 0      | 14     | A1  | 2    | 14   | $\leftarrow$ | 13    | 1       | 13      | A2  | 2     | 13    | 11 848.8375         | 0.0008                                   | 0.0030     |
| 14   | 0      | 14     | A1  | 2    | 13   | $\leftarrow$ | 13    | 1       | 13      | A2  | 2     | 12    | 11 848.8375         | -0.0018                                  | 0.0030     |
| 14   | 0      | 14     | A1  | 1    | 15   | $\leftarrow$ | 13    | 1       | 13      | A2  | 1     | 14    | 11 848.8434         | 0.0016                                   | 0.0030     |
| 14   | 0      | 14     | A1  | 1    | 13   | $\leftarrow$ | 13    | 1       | 13      | A2  | 1     | 12    | 11 848.8434         | 0.0022                                   | 0.0030     |
| 14   | 0      | 14     | A1  | 2    | 15   | $\leftarrow$ | 13    | 1       | 13      | A2  | 2     | 14    | 11 848.8434         | 0.0008                                   | 0.0030     |
| 14   | 0      | 14     | A1  | 2    | 12   | $\leftarrow$ | 13    | 1       | 13      | A2  | 2     | 11    | 11 848.8434         | -0.0001                                  | 0.0030     |
| 14   | 0      | 14     | A1  | 0    | 14   | $\leftarrow$ | 13    | 1       | 13      | A2  | 0     | 13    | 11 848.8471         | 0.0013                                   | 0.0030     |
| 14   | 0      | 14     | A1  | 1    | 14   | $\leftarrow$ | 13    | 1       | 13      | A2  | 1     | 13    | 11 848.8471         | 0.0018                                   | 0.0030     |
| 14   | 0      | 14     | A1  | 2    | 16   | $\leftarrow$ | 13    | 1       | 13      | A2  | 2     | 15    | 11 848.8480         | 0.0006                                   | 0.0030     |
| 13   | 2      | 12     | A1  | 2    | 13   | $\leftarrow$ | 12    | 1       | 11      | A2  | 2     | 12    | 11 982.1592         | 0.0066                                   | 0.0100     |
| 13   | 2      | 12     | A1  | 1    | 14   | $\leftarrow$ | 12    | 1       | 11      | A2  | 1     | 13    | 11 982.1764         | -0.0039                                  | 0.0050     |
| 13   | 2      | 12     | A1  | 2    | 12   | $\leftarrow$ | 12    | 1       | 11      | A2  | 2     | 11    | 11 982.1764         | -0.0039                                  | 0.0050     |
| 13   | 2      | 12     | A1  | 2    | 14   | $\leftarrow$ | 12    | 1       | 11      | A2  | 2     | 13    | 11 982.1764         | 0.0014                                   | 0.0050     |
| 13   | 2      | 12     | A1  | 1    | 12   | $\leftarrow$ | 12    | 1       | 11      | A2  | 1     | 11    | 11 982.1764         | 0.0010                                   | 0.0050     |
| 13   | 2      | 12     | A1  | 2    | 15   | $\leftarrow$ | 12    | 1       | 11      | A2  | 2     | 14    | 11 982.2055         | 0.0029                                   | 0.0050     |
| 13   | 2      | 12     | A1  | 0    | 13   | $\leftarrow$ | 12    | 1       | 11      | A2  | 0     | 12    | 11 982.2055         | 0.0027                                   | 0.0050     |

| $J'$ | $K'_a$ | $K'_c$ | $S$ | $I'$ | $F'$ | $\leftarrow$ | $J''$ | $K''_a$ | $K''_c$ | $S$ | $I''$ | $F''$ | $\nu_{\text{obs.}}$ | $\nu_{\text{obs.}} - \nu_{\text{calc.}}$ | exp. error |
|------|--------|--------|-----|------|------|--------------|-------|---------|---------|-----|-------|-------|---------------------|------------------------------------------|------------|
| 13   | 2      | 12     | A1  | 1    | 13   | $\leftarrow$ | 12    | 1       | 11      | A2  | 1     | 12    | 11 982.2055         | 0.0026                                   | 0.0050     |
| 13   | 2      | 12     | A1  | 2    | 11   | $\leftarrow$ | 12    | 1       | 11      | A2  | 2     | 10    | 11 982.2055         | 0.0026                                   | 0.0050     |
| 7    | 2      | 5      | E   | 2    | 9    | $\leftarrow$ | 6     | 1       | 6       | E   | 2     | 8     | 12 552.7668         | 0.0027                                   | 0.0020     |
| 7    | 2      | 5      | A2  | 2    | 9    | $\leftarrow$ | 6     | 1       | 6       | A1  | 2     | 8     | 12 552.7794         | 0.0034                                   | 0.0010     |
| 7    | 2      | 5      | E   |      |      | $\leftarrow$ | 6     | 1       | 6       | E   |       |       | 12 552.9310         | -0.0040                                  | 0.0020     |
| 7    | 2      | 5      | E   | 2    | 7    | $\leftarrow$ | 6     | 1       | 6       | E   | 2     | 6     | 12 553.3552         | 0.0002                                   | 0.0010     |
| 7    | 2      | 5      | A2  | 2    | 7    | $\leftarrow$ | 6     | 1       | 6       | A1  | 2     | 6     | 12 553.3680         | 0.0011                                   | 0.0010     |
| 15   | 0      | 15     | A2  | 2    | 15   | $\leftarrow$ | 14    | 1       | 14      | A1  | 2     | 14    | 12 668.8022         | 0.0090                                   | 0.0050     |
| 15   | 0      | 15     | A2  | 1    | 14   | $\leftarrow$ | 14    | 1       | 14      | A1  | 1     | 13    | 12 668.8022         | 0.0051                                   | 0.0050     |
| 15   | 0      | 15     | A2  | 2    | 16   | $\leftarrow$ | 14    | 1       | 14      | A1  | 2     | 15    | 12 668.8022         | 0.0038                                   | 0.0050     |
| 15   | 0      | 15     | A2  | 2    | 14   | $\leftarrow$ | 14    | 1       | 14      | A1  | 2     | 13    | 12 668.8022         | 0.0066                                   | 0.0050     |
| 15   | 0      | 15     | A2  | 2    | 13   | $\leftarrow$ | 14    | 1       | 14      | A1  | 2     | 12    | 12 668.8022         | 0.0030                                   | 0.0050     |
| 15   | 0      | 15     | A2  | 0    | 15   | $\leftarrow$ | 14    | 1       | 14      | A1  | 0     | 14    | 12 668.8022         | 0.0009                                   | 0.0050     |
| 15   | 0      | 15     | A2  | 1    | 16   | $\leftarrow$ | 14    | 1       | 14      | A1  | 1     | 15    | 12 668.8022         | 0.0044                                   | 0.0050     |
| 15   | 0      | 15     | A2  | 1    | 15   | $\leftarrow$ | 14    | 1       | 14      | A1  | 1     | 14    | 12 668.8022         | 0.0013                                   | 0.0050     |
| 15   | 0      | 15     | A2  | 2    | 17   | $\leftarrow$ | 14    | 1       | 14      | A1  | 2     | 16    | 12 668.8022         | -0.0006                                  | 0.0050     |
| 14   | 2      | 13     | A2  | 2    | 14   | $\leftarrow$ | 13    | 1       | 12      | A1  | 2     | 13    | 12 734.6503         | -0.0025                                  | 0.0050     |
| 14   | 2      | 13     | A2  | 2    | 13   | $\leftarrow$ | 13    | 1       | 12      | A1  | 2     | 12    | 12 734.6706         | -0.0029                                  | 0.0050     |
| 14   | 2      | 13     | A2  | 2    | 15   | $\leftarrow$ | 13    | 1       | 12      | A1  | 2     | 14    | 12 734.6706         | 0.0003                                   | 0.0050     |
| 14   | 2      | 13     | A2  | 1    | 13   | $\leftarrow$ | 13    | 1       | 12      | A1  | 1     | 12    | 12 734.6706         | 0.0004                                   | 0.0050     |
| 14   | 2      | 13     | A2  | 1    | 15   | $\leftarrow$ | 13    | 1       | 12      | A1  | 1     | 14    | 12 734.6706         | -0.0034                                  | 0.0050     |
| 14   | 2      | 13     | A2  | 0    | 14   | $\leftarrow$ | 13    | 1       | 12      | A1  | 0     | 13    | 12 734.6952         | 0.0040                                   | 0.0050     |
| 14   | 2      | 13     | A2  | 2    | 12   | $\leftarrow$ | 13    | 1       | 12      | A1  | 2     | 11    | 12 734.6952         | 0.0044                                   | 0.0050     |
| 14   | 2      | 13     | A2  | 2    | 16   | $\leftarrow$ | 13    | 1       | 12      | A1  | 2     | 15    | 12 734.6952         | 0.0039                                   | 0.0050     |
| 14   | 2      | 13     | A2  | 1    | 14   | $\leftarrow$ | 13    | 1       | 12      | A1  | 1     | 13    | 12 734.6952         | 0.0041                                   | 0.0050     |
| 15   | 1      | 14     | A1  | 2    | 15   | $\leftarrow$ | 14    | 2       | 13      | A2  | 2     | 14    | 13 403.0512         | -0.0037                                  | 0.0020     |
| 15   | 1      | 14     | A1  | 1    | 14   | $\leftarrow$ | 14    | 2       | 13      | A2  | 1     | 13    | 13 403.0609         | -0.0021                                  | 0.0020     |
| 15   | 1      | 14     | A1  | 2    | 14   | $\leftarrow$ | 14    | 2       | 13      | A2  | 2     | 13    | 13 403.0609         | -0.0026                                  | 0.0020     |
| 15   | 1      | 14     | A1  | 1    | 16   | $\leftarrow$ | 14    | 2       | 13      | A2  | 1     | 15    | 13 403.0609         | -0.0037                                  | 0.0020     |
| 15   | 1      | 14     | A1  | 2    | 16   | $\leftarrow$ | 14    | 2       | 13      | A2  | 2     | 15    | 13 403.0609         | -0.0027                                  | 0.0020     |
| 15   | 1      | 14     | A1  | 2    | 13   | $\leftarrow$ | 14    | 2       | 13      | A2  | 2     | 12    | 13 403.0716         | 0.0002                                   | 0.0020     |
| 15   | 1      | 14     | A1  | 0    | 15   | $\leftarrow$ | 14    | 2       | 13      | A2  | 0     | 14    | 13 403.0716         | -0.0009                                  | 0.0020     |
| 15   | 1      | 14     | A1  | 1    | 15   | $\leftarrow$ | 14    | 2       | 13      | A2  | 1     | 14    | 13 403.0716         | -0.0007                                  | 0.0020     |
| 16   | 0      | 16     | A1  | 2    | 14   | $\leftarrow$ | 15    | 1       | 15      | A2  | 2     | 13    | 13 488.1457         | 0.0008                                   | 0.0050     |
| 16   | 0      | 16     | A1  | 1    | 15   | $\leftarrow$ | 15    | 1       | 15      | A2  | 1     | 14    | 13 488.1457         | 0.0028                                   | 0.0050     |
| 16   | 0      | 16     | A1  | 2    | 15   | $\leftarrow$ | 15    | 1       | 15      | A2  | 2     | 14    | 13 488.1457         | 0.0041                                   | 0.0050     |
| 16   | 0      | 16     | A1  | 0    | 16   | $\leftarrow$ | 15    | 1       | 15      | A2  | 0     | 15    | 13 488.1457         | -0.0010                                  | 0.0050     |
| 16   | 0      | 16     | A1  | 1    | 16   | $\leftarrow$ | 15    | 1       | 15      | A2  | 1     | 15    | 13 488.1457         | -0.0007                                  | 0.0050     |
| 16   | 0      | 16     | A1  | 2    | 16   | $\leftarrow$ | 15    | 1       | 15      | A2  | 2     | 15    | 13 488.1457         | 0.0062                                   | 0.0050     |

| $J'$ | $K'_a$ | $K'_c$ | $S$ | $I'$ | $F'$ | $\leftarrow$ | $J''$ | $K''_a$ | $K''_c$ | $S$ | $I''$ | $F''$ | $\nu_{\text{obs.}}$ | $\nu_{\text{obs.}} - \nu_{\text{calc.}}$ | exp. error |
|------|--------|--------|-----|------|------|--------------|-------|---------|---------|-----|-------|-------|---------------------|------------------------------------------|------------|
| 16   | 1      | 16     | A1  | 2    | 14   | $\leftarrow$ | 15    | 1       | 15      | A2  | 2     | 13    | 13 488.6970         | 0.0005                                   | 0.0050     |
| 16   | 1      | 16     | A1  | 1    | 15   | $\leftarrow$ | 15    | 1       | 15      | A2  | 1     | 14    | 13 488.6970         | 0.0025                                   | 0.0050     |
| 16   | 1      | 16     | A1  | 2    | 15   | $\leftarrow$ | 15    | 1       | 15      | A2  | 2     | 14    | 13 488.6970         | 0.0038                                   | 0.0050     |
| 16   | 1      | 16     | A1  | 0    | 16   | $\leftarrow$ | 15    | 1       | 15      | A2  | 0     | 15    | 13 488.6970         | -0.0013                                  | 0.0050     |
| 16   | 1      | 16     | A1  | 1    | 16   | $\leftarrow$ | 15    | 1       | 15      | A2  | 1     | 15    | 13 488.6970         | -0.0010                                  | 0.0050     |
| 16   | 1      | 16     | A1  | 2    | 16   | $\leftarrow$ | 15    | 1       | 15      | A2  | 2     | 15    | 13 488.6970         | 0.0060                                   | 0.0050     |
| 16   | 1      | 16     | A1  | 2    | 14   | $\leftarrow$ | 15    | 0       | 15      | A2  | 2     | 13    | 13 489.7573         | 0.0008                                   | 0.0050     |
| 16   | 1      | 16     | A1  | 1    | 15   | $\leftarrow$ | 15    | 0       | 15      | A2  | 1     | 14    | 13 489.7573         | 0.0029                                   | 0.0050     |
| 16   | 1      | 16     | A1  | 2    | 15   | $\leftarrow$ | 15    | 0       | 15      | A2  | 2     | 14    | 13 489.7573         | 0.0041                                   | 0.0050     |
| 16   | 1      | 16     | A1  | 0    | 16   | $\leftarrow$ | 15    | 0       | 15      | A2  | 0     | 15    | 13 489.7573         | -0.0011                                  | 0.0050     |
| 16   | 1      | 16     | A1  | 1    | 16   | $\leftarrow$ | 15    | 0       | 15      | A2  | 1     | 15    | 13 489.7573         | -0.0007                                  | 0.0050     |
| 16   | 1      | 16     | A1  | 2    | 16   | $\leftarrow$ | 15    | 0       | 15      | A2  | 2     | 15    | 13 489.7573         | 0.0064                                   | 0.0050     |
| 15   | 2      | 14     | A1  | 2    | 15   | $\leftarrow$ | 14    | 1       | 13      | A2  | 2     | 14    | 13 511.9023         | -0.0015                                  | 0.0050     |
| 15   | 2      | 14     | A1  | 2    | 14   | $\leftarrow$ | 14    | 1       | 13      | A2  | 2     | 13    | 13 511.9194         | -0.0004                                  | 0.0050     |
| 15   | 2      | 14     | A1  | 1    | 16   | $\leftarrow$ | 14    | 1       | 13      | A2  | 1     | 15    | 13 511.9194         | -0.0011                                  | 0.0050     |
| 15   | 2      | 14     | A1  | 1    | 14   | $\leftarrow$ | 14    | 1       | 13      | A2  | 1     | 13    | 13 511.9194         | 0.0019                                   | 0.0050     |
| 15   | 2      | 14     | A1  | 2    | 16   | $\leftarrow$ | 14    | 1       | 13      | A2  | 2     | 15    | 13 511.9194         | 0.0016                                   | 0.0050     |
| 15   | 2      | 14     | A1  | 2    | 13   | $\leftarrow$ | 14    | 1       | 13      | A2  | 2     | 12    | 13 511.9378         | 0.0044                                   | 0.0050     |
| 15   | 2      | 14     | A1  | 0    | 15   | $\leftarrow$ | 14    | 1       | 13      | A2  | 0     | 14    | 13 511.9378         | 0.0038                                   | 0.0050     |
| 15   | 2      | 14     | A1  | 1    | 15   | $\leftarrow$ | 14    | 1       | 13      | A2  | 1     | 14    | 13 511.9378         | 0.0039                                   | 0.0050     |
| 15   | 2      | 14     | A1  | 2    | 17   | $\leftarrow$ | 14    | 1       | 13      | A2  | 2     | 16    | 13 511.9378         | 0.0035                                   | 0.0050     |
| 7    | 4      | 3      | A2  | 2    | 9    | $\leftarrow$ | 6     | 3       | 4       | A1  | 2     | 8     | 13 809.1542         | 0.0015                                   | 0.0020     |
| 7    | 4      | 3      | A2  |      |      | $\leftarrow$ | 6     | 3       | 4       | A1  |       |       | 13 809.1790         | -0.0010                                  | 0.0050     |
| 7    | 4      | 3      | E   |      |      | $\leftarrow$ | 6     | 3       | 4       | E   |       |       | 13 809.2200         | 0.0110                                   | 0.0050     |
| 7    | 4      | 3      | E   | 2    | 7    | $\leftarrow$ | 6     | 3       | 4       | E   | 2     | 6     | 13 809.2780         | 0.0010                                   | 0.0020     |
| 16   | 1      | 15     | A2  | 2    | 16   | $\leftarrow$ | 15    | 2       | 14      | A1  | 2     | 15    | 14 242.9662         | -0.0032                                  | 0.0020     |
| 16   | 1      | 15     | A2  | 1    | 15   | $\leftarrow$ | 15    | 2       | 14      | A1  | 1     | 14    | 14 242.9756         | -0.0018                                  | 0.0020     |
| 16   | 1      | 15     | A2  | 2    | 15   | $\leftarrow$ | 15    | 2       | 14      | A1  | 2     | 14    | 14 242.9756         | -0.0025                                  | 0.0020     |
| 16   | 1      | 15     | A2  | 2    | 14   | $\leftarrow$ | 15    | 2       | 14      | A1  | 2     | 13    | 14 242.9864         | 0.0004                                   | 0.0020     |
| 16   | 1      | 15     | A2  | 0    | 16   | $\leftarrow$ | 15    | 2       | 14      | A1  | 0     | 15    | 14 242.9864         | -0.0005                                  | 0.0020     |
| 16   | 1      | 15     | A2  | 1    | 16   | $\leftarrow$ | 15    | 2       | 14      | A1  | 1     | 15    | 14 242.9864         | -0.0004                                  | 0.0020     |
| 16   | 2      | 15     | A2  | 2    | 16   | $\leftarrow$ | 15    | 2       | 14      | A1  | 2     | 15    | 14 265.5461         | -0.0016                                  | 0.0050     |
| 16   | 2      | 15     | A2  | 2    | 15   | $\leftarrow$ | 15    | 2       | 14      | A1  | 2     | 14    | 14 265.5556         | -0.0023                                  | 0.0050     |
| 16   | 2      | 15     | A2  | 1    | 17   | $\leftarrow$ | 15    | 2       | 14      | A1  | 1     | 16    | 14 265.5566         | -0.0022                                  | 0.0050     |
| 16   | 2      | 15     | A2  | 1    | 15   | $\leftarrow$ | 15    | 2       | 14      | A1  | 1     | 14    | 14 265.5566         | -0.0002                                  | 0.0050     |
| 16   | 2      | 15     | A2  | 2    | 17   | $\leftarrow$ | 15    | 2       | 14      | A1  | 2     | 16    | 14 265.5566         | -0.0007                                  | 0.0050     |
| 16   | 2      | 15     | A2  | 2    | 14   | $\leftarrow$ | 15    | 2       | 14      | A1  | 2     | 13    | 14 265.5680         | 0.0011                                   | 0.0050     |
| 16   | 2      | 15     | A2  | 0    | 16   | $\leftarrow$ | 15    | 2       | 14      | A1  | 0     | 15    | 14 265.5680         | 0.0003                                   | 0.0050     |
| 16   | 2      | 15     | A2  | 1    | 16   | $\leftarrow$ | 15    | 2       | 14      | A1  | 1     | 15    | 14 265.5680         | 0.0004                                   | 0.0050     |

| $J'$ | $K'_a$ | $K'_c$ | $S$ | $I'$ | $F'$ | $\leftarrow$ | $J''$ | $K''_a$ | $K''_c$ | $S$ | $I''$ | $F''$ | $\nu_{\text{obs.}}$ | $\nu_{\text{obs.}} - \nu_{\text{calc.}}$ | exp. error |
|------|--------|--------|-----|------|------|--------------|-------|---------|---------|-----|-------|-------|---------------------|------------------------------------------|------------|
| 16   | 2      | 15     | A2  | 2    | 18   | $\leftarrow$ | 15    | 2       | 14      | A1  | 2     | 17    | 14 265.5680         | -0.0003                                  | 0.0050     |
| 16   | 2      | 15     | A2  | 2    | 16   | $\leftarrow$ | 15    | 1       | 14      | A1  | 2     | 15    | 14 305.3471         | -0.0022                                  | 0.0050     |
| 16   | 2      | 15     | A2  | 2    | 15   | $\leftarrow$ | 15    | 1       | 14      | A1  | 2     | 14    | 14 305.3613         | -0.0008                                  | 0.0050     |
| 16   | 2      | 15     | A2  | 1    | 17   | $\leftarrow$ | 15    | 1       | 14      | A1  | 1     | 16    | 14 305.3613         | -0.0016                                  | 0.0050     |
| 16   | 2      | 15     | A2  | 1    | 15   | $\leftarrow$ | 15    | 1       | 14      | A1  | 1     | 14    | 14 305.3613         | 0.0009                                   | 0.0050     |
| 16   | 2      | 15     | A2  | 2    | 17   | $\leftarrow$ | 15    | 1       | 14      | A1  | 2     | 16    | 14 305.3613         | 0.0005                                   | 0.0050     |
| 16   | 2      | 15     | A2  | 2    | 14   | $\leftarrow$ | 15    | 1       | 14      | A1  | 2     | 13    | 14 305.3764         | 0.0033                                   | 0.0050     |
| 16   | 2      | 15     | A2  | 0    | 16   | $\leftarrow$ | 15    | 1       | 14      | A1  | 0     | 15    | 14 305.3764         | 0.0026                                   | 0.0050     |
| 16   | 2      | 15     | A2  | 1    | 16   | $\leftarrow$ | 15    | 1       | 14      | A1  | 1     | 15    | 14 305.3764         | 0.0027                                   | 0.0050     |
| 16   | 2      | 15     | A2  | 2    | 18   | $\leftarrow$ | 15    | 1       | 14      | A1  | 2     | 17    | 14 305.3764         | 0.0021                                   | 0.0050     |
| 17   | 0      | 17     | A2  | 2    | 15   | $\leftarrow$ | 16    | 1       | 16      | A1  | 2     | 14    | 14 307.1694         | 0.0003                                   | 0.0020     |
| 17   | 0      | 17     | A2  | 1    | 16   | $\leftarrow$ | 16    | 1       | 16      | A1  | 1     | 15    | 14 307.1694         | 0.0021                                   | 0.0020     |
| 17   | 0      | 17     | A2  | 2    | 16   | $\leftarrow$ | 16    | 1       | 16      | A1  | 2     | 15    | 14 307.1694         | 0.0031                                   | 0.0020     |
| 17   | 1      | 17     | A2  | 2    | 15   | $\leftarrow$ | 16    | 1       | 16      | A1  | 2     | 14    | 14 307.4537         | -0.0006                                  | 0.0020     |
| 17   | 1      | 17     | A2  | 1    | 16   | $\leftarrow$ | 16    | 1       | 16      | A1  | 1     | 15    | 14 307.4537         | 0.0012                                   | 0.0020     |
| 17   | 1      | 17     | A2  | 2    | 16   | $\leftarrow$ | 16    | 1       | 16      | A1  | 2     | 15    | 14 307.4537         | 0.0022                                   | 0.0020     |
| 17   | 1      | 17     | A2  | 2    | 15   | $\leftarrow$ | 16    | 0       | 16      | A1  | 2     | 14    | 14 308.0061         | 0.0001                                   | 0.0020     |
| 17   | 1      | 17     | A2  | 1    | 16   | $\leftarrow$ | 16    | 0       | 16      | A1  | 1     | 15    | 14 308.0061         | 0.0020                                   | 0.0020     |
| 17   | 1      | 17     | A2  | 2    | 16   | $\leftarrow$ | 16    | 0       | 16      | A1  | 2     | 15    | 14 308.0061         | 0.0030                                   | 0.0020     |
| 8    | 4      | 5      | E   | 2    | 6    | $\leftarrow$ | 7     | 3       | 4       | E   | 2     | 5     | 14 602.0532         | -0.0024                                  | 0.0020     |
| 8    | 2      | 6      | E   |      |      | $\leftarrow$ | 7     | 1       | 7       | E   |       |       | 14 651.1200         | -0.0060                                  | 0.0020     |
| 8    | 2      | 6      | E   | 2    | 8    | $\leftarrow$ | 7     | 1       | 7       | E   | 2     | 7     | 14 651.5548         | -0.0007                                  | 0.0010     |
| 8    | 2      | 6      | A1  | 2    | 8    | $\leftarrow$ | 7     | 1       | 7       | A2  | 2     | 7     | 14 651.5694         | -0.0017                                  | 0.0010     |
| 8    | 4      | 4      | A1  | 2    | 6    | $\leftarrow$ | 7     | 3       | 5       | A2  | 2     | 5     | 14 809.2848         | -0.0036                                  | 0.0010     |
| 8    | 4      | 4      | A1  | 1    | 8    | $\leftarrow$ | 7     | 3       | 5       | A2  | 1     | 7     | 14 809.2953         | -0.0004                                  | 0.0010     |
| 8    | 4      | 4      | A1  | 2    | 7    | $\leftarrow$ | 7     | 3       | 5       | A2  | 2     | 6     | 14 809.3342         | 0.0011                                   | 0.0010     |
| 6    | 5      | 2      | A1  | 2    | 4    | $\leftarrow$ | 5     | 4       | 1       | A2  | 2     | 3     | 14 836.0507         | 0.0037                                   | 0.0020     |
| 6    | 5      | 1      | A2  | 2    | 6    | $\leftarrow$ | 5     | 4       | 2       | A1  | 2     | 5     | 14 836.6131         | 0.0006                                   | 0.0020     |
| 17   | 1      | 16     | A1  | 1    | 16   | $\leftarrow$ | 16    | 2       | 15      | A2  | 1     | 15    | 15 073.7179         | -0.0013                                  | 0.0020     |
| 17   | 1      | 16     | A1  | 2    | 16   | $\leftarrow$ | 16    | 2       | 15      | A2  | 2     | 15    | 15 073.7179         | -0.0021                                  | 0.0020     |
| 17   | 1      | 16     | A1  | 2    | 15   | $\leftarrow$ | 16    | 2       | 15      | A2  | 2     | 14    | 15 073.7281         | 0.0006                                   | 0.0020     |
| 17   | 2      | 16     | A1  | 2    | 17   | $\leftarrow$ | 16    | 1       | 15      | A2  | 2     | 16    | 15 108.9249         | -0.0010                                  | 0.0020     |
| 17   | 2      | 16     | A1  | 2    | 16   | $\leftarrow$ | 16    | 1       | 15      | A2  | 2     | 15    | 15 108.9364         | -0.0001                                  | 0.0050     |
| 17   | 2      | 16     | A1  | 1    | 16   | $\leftarrow$ | 16    | 1       | 15      | A2  | 1     | 15    | 15 108.9364         | 0.0012                                   | 0.0050     |
| 17   | 2      | 16     | A1  | 1    | 18   | $\leftarrow$ | 16    | 1       | 15      | A2  | 1     | 17    | 15 108.9364         | -0.0009                                  | 0.0050     |
| 17   | 2      | 16     | A1  | 2    | 18   | $\leftarrow$ | 16    | 1       | 15      | A2  | 2     | 17    | 15 108.9364         | 0.0008                                   | 0.0050     |
| 17   | 2      | 16     | A1  | 2    | 15   | $\leftarrow$ | 16    | 1       | 15      | A2  | 2     | 14    | 15 108.9487         | 0.0030                                   | 0.0050     |
| 17   | 2      | 16     | A1  | 0    | 17   | $\leftarrow$ | 16    | 1       | 15      | A2  | 0     | 16    | 15 108.9487         | 0.0023                                   | 0.0050     |
| 17   | 2      | 16     | A1  | 1    | 17   | $\leftarrow$ | 16    | 1       | 15      | A2  | 1     | 16    | 15 108.9487         | 0.0024                                   | 0.0050     |

| $J'$ | $K'_a$ | $K'_c$ | $S$ | $I'$ | $F'$ | $\leftarrow$ | $J''$ | $K''_a$ | $K''_c$ | $S$ | $I''$ | $F''$ | $\nu_{\text{obs.}}$ | $\nu_{\text{obs.}} - \nu_{\text{calc.}}$ | exp. error |
|------|--------|--------|-----|------|------|--------------|-------|---------|---------|-----|-------|-------|---------------------|------------------------------------------|------------|
| 17   | 2      | 16     | A1  | 2    | 19   | $\leftarrow$ | 16    | 1       | 15      | A2  | 2     | 18    | 15 108.9487         | 0.0018                                   | 0.0050     |
| 18   | 0      | 18     | A1  | 2    | 16   | $\leftarrow$ | 17    | 1       | 17      | A2  | 2     | 15    | 15 126.0276         | 0.0000                                   | 0.0020     |
| 18   | 1      | 18     | A1  | 2    | 16   | $\leftarrow$ | 17    | 0       | 17      | A2  | 2     | 15    | 15 126.4594         | -0.0001                                  | 0.0020     |
| 9    | 4      | 6      | A1  | 2    | 9    | $\leftarrow$ | 8     | 3       | 5       | A2  | 2     | 8     | 15 408.3349         | -0.0284                                  | 0.0100     |
| 9    | 4      | 6      | A1  | 2    | 8    | $\leftarrow$ | 8     | 3       | 5       | A2  | 2     | 7     | 15 408.3392         | -0.0317                                  | 0.0100     |
| 9    | 4      | 6      | A1  | 1    | 9    | $\leftarrow$ | 8     | 3       | 5       | A2  | 1     | 8     | 15 408.3931         | 0.0159                                   | 0.0020     |
| 7    | 5      | 3      | E   |      |      | $\leftarrow$ | 6     | 4       | 2       | E   |       |       | 15 794.9400         | -0.0090                                  | 0.0050     |
| 7    | 5      | 3      | E   | 2    | 7    | $\leftarrow$ | 6     | 4       | 2       | E   | 2     | 6     | 15 794.9957         | -0.0090                                  | 0.0020     |
| 7    | 5      | 3      | A2  | 2    | 5    | $\leftarrow$ | 6     | 4       | 2       | A1  | 2     | 4     | 15 795.5768         | 0.0001                                   | 0.0020     |
| 7    | 5      | 3      | A2  | 1    | 7    | $\leftarrow$ | 6     | 4       | 2       | A1  | 1     | 6     | 15 795.5795         | -0.0016                                  | 0.0020     |
| 7    | 5      | 3      | A2  | 0    | 7    | $\leftarrow$ | 6     | 4       | 2       | A1  | 0     | 6     | 15 795.5885         | 0.0064                                   | 0.0020     |
| 7    | 5      | 3      | A2  | 2    | 9    | $\leftarrow$ | 6     | 4       | 2       | A1  | 2     | 8     | 15 795.5887         | 0.0027                                   | 0.0020     |
| 7    | 5      | 3      | A2  | 2    | 6    | $\leftarrow$ | 6     | 4       | 2       | A1  | 2     | 5     | 15 795.6036         | -0.0112                                  | 0.0020     |
| 7    | 5      | 3      | A2  | 1    | 8    | $\leftarrow$ | 6     | 4       | 2       | A1  | 1     | 7     | 15 795.6134         | -0.0070                                  | 0.0020     |
| 7    | 5      | 3      | A2  | 1    | 6    | $\leftarrow$ | 6     | 4       | 2       | A1  | 1     | 5     | 15 795.6377         | 0.0097                                   | 0.0020     |
| 7    | 5      | 3      | A2  | 2    | 8    | $\leftarrow$ | 6     | 4       | 2       | A1  | 2     | 7     | 15 795.6428         | 0.0111                                   | 0.0020     |
| 7    | 5      | 3      | A2  | 2    | 7    | $\leftarrow$ | 6     | 4       | 2       | A1  | 2     | 6     | 15 795.6666         | 0.0009                                   | 0.0020     |
| 7    | 5      | 2      | A1  | 2    | 5    | $\leftarrow$ | 6     | 4       | 3       | A2  | 2     | 4     | 15 797.9939         | 0.0000                                   | 0.0020     |
| 7    | 5      | 2      | A1  | 2    | 9    | $\leftarrow$ | 6     | 4       | 3       | A2  | 2     | 8     | 15 798.0030         | -0.0004                                  | 0.0020     |
| 7    | 5      | 2      | A1  | 2    | 8    | $\leftarrow$ | 6     | 4       | 3       | A2  | 2     | 7     | 15 798.0536         | 0.0036                                   | 0.0020     |
| 7    | 5      | 2      | A1  | 2    | 7    | $\leftarrow$ | 6     | 4       | 3       | A2  | 2     | 6     | 15 798.0854         | 0.0009                                   | 0.0020     |
| 7    | 5      | 2      | E   |      |      | $\leftarrow$ | 6     | 4       | 3       | E   |       |       | 15 798.6750         | -0.0070                                  | 0.0050     |
| 7    | 5      | 2      | E   | 2    | 7    | $\leftarrow$ | 6     | 4       | 3       | E   | 2     | 6     | 15 798.7297         | -0.0090                                  | 0.0020     |
| 18   | 1      | 17     | A2  | 1    | 17   | $\leftarrow$ | 17    | 2       | 16      | A1  | 1     | 16    | 15 899.0273         | -0.0016                                  | 0.0020     |
| 18   | 1      | 17     | A2  | 2    | 17   | $\leftarrow$ | 17    | 2       | 16      | A1  | 2     | 16    | 15 899.0273         | -0.0024                                  | 0.0020     |
| 18   | 1      | 17     | A2  | 1    | 19   | $\leftarrow$ | 17    | 2       | 16      | A1  | 1     | 18    | 15 899.0273         | -0.0033                                  | 0.0020     |
| 18   | 1      | 17     | A2  | 2    | 19   | $\leftarrow$ | 17    | 2       | 16      | A1  | 2     | 18    | 15 899.0273         | -0.0021                                  | 0.0020     |
| 18   | 1      | 17     | A2  | 2    | 16   | $\leftarrow$ | 17    | 2       | 16      | A1  | 2     | 15    | 15 899.0369         | 0.0002                                   | 0.0020     |
| 18   | 1      | 17     | A2  | 0    | 18   | $\leftarrow$ | 17    | 2       | 16      | A1  | 0     | 17    | 15 899.0369         | -0.0006                                  | 0.0020     |
| 18   | 1      | 17     | A2  | 1    | 18   | $\leftarrow$ | 17    | 2       | 16      | A1  | 1     | 17    | 15 899.0369         | -0.0004                                  | 0.0020     |
| 18   | 1      | 17     | A2  | 2    | 20   | $\leftarrow$ | 17    | 2       | 16      | A1  | 2     | 19    | 15 899.0369         | -0.0011                                  | 0.0020     |
| 18   | 2      | 17     | A2  | 2    | 18   | $\leftarrow$ | 17    | 1       | 16      | A1  | 2     | 17    | 15 918.6468         | -0.0013                                  | 0.0050     |
| 18   | 2      | 17     | A2  | 2    | 17   | $\leftarrow$ | 17    | 1       | 16      | A1  | 2     | 16    | 15 918.6568         | -0.0003                                  | 0.0050     |
| 18   | 2      | 17     | A2  | 1    | 17   | $\leftarrow$ | 17    | 1       | 16      | A1  | 1     | 16    | 15 918.6568         | 0.0008                                   | 0.0050     |
| 18   | 2      | 17     | A2  | 1    | 19   | $\leftarrow$ | 17    | 1       | 16      | A1  | 1     | 18    | 15 918.6568         | -0.0011                                  | 0.0050     |
| 18   | 2      | 17     | A2  | 2    | 19   | $\leftarrow$ | 17    | 1       | 16      | A1  | 2     | 18    | 15 918.6568         | 0.0003                                   | 0.0050     |
| 18   | 2      | 17     | A2  | 2    | 16   | $\leftarrow$ | 17    | 1       | 16      | A1  | 2     | 15    | 15 918.6687         | 0.0037                                   | 0.0050     |
| 18   | 2      | 17     | A2  | 0    | 18   | $\leftarrow$ | 17    | 1       | 16      | A1  | 0     | 17    | 15 918.6687         | 0.0030                                   | 0.0050     |
| 18   | 2      | 17     | A2  | 1    | 18   | $\leftarrow$ | 17    | 1       | 16      | A1  | 1     | 17    | 15 918.6687         | 0.0031                                   | 0.0050     |

| $J'$ | $K'_a$ | $K'_c$ | $S$ | $I'$ | $F'$ | $\leftarrow$ | $J''$ | $K''_a$ | $K''_c$ | $S$ | $I''$ | $F''$ | $\nu_{\text{obs.}}$ | $\nu_{\text{obs.}} - \nu_{\text{calc.}}$ | exp. error |
|------|--------|--------|-----|------|------|--------------|-------|---------|---------|-----|-------|-------|---------------------|------------------------------------------|------------|
| 18   | 2      | 17     | A2  | 2    | 20   | $\leftarrow$ | 17    | 1       | 16      | A1  | 2     | 19    | 15 918.6687         | 0.0025                                   | 0.0050     |
| 19   | 2      | 18     | A1  | 2    | 19   | $\leftarrow$ | 18    | 1       | 17      | A2  | 2     | 18    | 16 732.0200         | -0.0003                                  | 0.1000     |
| 19   | 2      | 18     | A1  | 2    | 18   | $\leftarrow$ | 18    | 1       | 17      | A2  | 2     | 17    | 16 732.0288         | 0.0006                                   | 0.0050     |
| 19   | 2      | 18     | A1  | 1    | 18   | $\leftarrow$ | 18    | 1       | 17      | A2  | 1     | 17    | 16 732.0288         | 0.0016                                   | 0.0050     |
| 19   | 2      | 18     | A1  | 1    | 20   | $\leftarrow$ | 18    | 1       | 17      | A2  | 1     | 19    | 16 732.0288         | -0.0001                                  | 0.0050     |
| 19   | 2      | 18     | A1  | 2    | 20   | $\leftarrow$ | 18    | 1       | 17      | A2  | 2     | 19    | 16 732.0288         | 0.0011                                   | 0.0050     |
| 19   | 2      | 18     | A1  | 2    | 17   | $\leftarrow$ | 18    | 1       | 17      | A2  | 2     | 16    | 16 732.0375         | 0.0025                                   | 0.0020     |
| 19   | 2      | 18     | A1  | 0    | 19   | $\leftarrow$ | 18    | 1       | 17      | A2  | 0     | 18    | 16 732.0375         | 0.0017                                   | 0.0020     |
| 19   | 2      | 18     | A1  | 1    | 19   | $\leftarrow$ | 18    | 1       | 17      | A2  | 1     | 18    | 16 732.0375         | 0.0019                                   | 0.0020     |
| 19   | 2      | 18     | A1  | 2    | 21   | $\leftarrow$ | 18    | 1       | 17      | A2  | 2     | 20    | 16 732.0375         | 0.0012                                   | 0.0020     |
| 8    | 5      | 4      | E   |      |      | $\leftarrow$ | 7     | 4       | 3       | E   |       |       | 16 748.9000         | 0.0350                                   | 0.0100     |
| 8    | 5      | 4      | A1  |      |      | $\leftarrow$ | 7     | 4       | 3       | A2  |       |       | 16 749.2690         | 0.0020                                   | 0.0050     |
